# Supplementary material for: STOX1 Overexpression in Choriocarcinoma Cells Mimics Transcriptional Alterations Observed in Preeclamptic Placentas
Source: PLoS One. 2008 Dec 11;3(12):e3905. doi: 10.1371/journal.pone.0003905 (PMC2592700; doi:10.1371/journal.pone.0003905)
Supplement: Table S1 — Promoter analysis. Comparison of the promoter content in Transcription factor binding sites betwwen STOX1-modified and STOX-1 unmodified genes (0.21 MB XLS) [file pone.0003905.s001.xls]

## Sheet: Feuil1
				Genes induced by STOX1 overexpression
Family	p-value	#sequences	Sequence:	GXP_207066	GXP_1274733	GXP_1505540	GXP_203196	GXP_203197	GXP_920354	GXP_1269282	GXP_85335	GXP_123769	GXP_490788	GXP_490789	GXP_1271780	GXP_1271782	GXP_1271783	GXP_1271784	GXP_1500426	GXP_1266000	GXP_1486212	GXP_88349	GXP_88350	GXP_204985	GXP_204986	GXP_4253	GXP_88492	GXP_1487094	GXP_218256	GXP_218257	GXP_1274138	GXP_169633	GXP_1255333	GXP_268872	GXP_268873	GXP_268874	GXP_1259171	GXP_1259172	GXP_1259175	GXP_1259176	GXP_1480467	GXP_1496815	GXP_1496816	GXP_1496817	GXP_158280	GXP_158281	GXP_158282	GXP_1267573	GXP_1494107
			Locus Id:	GXL_172581	GXL_172581	GXL_172581	GXL_169670	GXL_169670	GXL_169670	GXL_169670	GXL_70996	GXL_103293	GXL_103293	GXL_103293	GXL_103293	GXL_103293	GXL_103293	GXL_103293	GXL_103293	GXL_122588	GXL_692854	GXL_73722	GXL_73722	GXL_171051	GXL_171051	GXL_3395	GXL_73815	GXL_73815	GXL_182382	GXL_182382	GXL_182382	GXL_141058	GXL_141058	GXL_225411	GXL_225411	GXL_225411	GXL_225411	GXL_225411	GXL_225411	GXL_225411	GXL_225411	GXL_119112	GXL_119112	GXL_119112	GXL_131942	GXL_131942	GXL_131942	GXL_131942	GXL_131942
			Gene symbol:	HEY1	HEY1	HEY1	ZNF654	ZNF654	ZNF654	ZNF654	ZADH2	NR3C1	NR3C1	NR3C1	NR3C1	NR3C1	NR3C1	NR3C1	NR3C1	RBL1	LOC342892	ZNF559	ZNF559	VGLL3	VGLL3	ZNF564	PEG3	PEG3	PARP12	PARP12	PARP12	RNF141	RNF141	RORA	RORA	RORA	RORA	RORA	RORA	RORA	RORA	BBX	BBX	BBX	JMJD1A	JMJD1A	JMJD1A	JMJD1A	JMJD1A
V$PPAR	0.981	9		0	0	0	0	1	0	0	0	0	0	0	0	0	0	0	0	0	0	0	0	0	0	0	0	0	0	0	0	0	0	0	0	0	0	0	0	0	0	0	0	0	0	1	0	2	0
V$CSEN	0.791585	16		0	0	0	0	0	0	0	0	0	0	0	0	0	0	0	0	0	0	0	0	0	0	0	2	0	1	0	0	0	0	0	0	0	0	0	1	0	0	0	0	0	0	0	0	0	0
V$TBPF				0	0	0	0	0	0	0	0	0	0	0	0	0	0	0	0	0	0	0	0	0	0	0	0	0	0	0	0	0	0	0	0	0	0	0	0	0	0	0	0	0	0	0	0	0	0
V$AARF	0.869851	7		0	0	0	0	0	0	0	0	0	0	0	0	0	0	0	0	0	0	0	0	0	0	0	0	0	0	0	1	0	1	0	0	0	0	1	0	0	0	0	0	0	0	0	0	0	0
V$NRLF				0	0	0	0	0	0	0	0	0	0	0	0	0	0	0	0	0	0	0	0	0	0	0	0	0	0	0	0	0	0	0	0	0	0	0	0	0	0	0	0	0	0	0	0	0	0
V$GCNR	0.68014	5		0	0	0	0	0	0	0	0	0	0	0	0	0	0	0	0	0	0	0	0	0	0	0	0	0	0	0	1	0	0	0	0	0	0	0	0	0	0	0	0	0	0	0	0	1	0
V$DMRT	0.911068	58		0	0	1	4	4	2	3	0	0	0	3	4	0	0	0	0	1	0	1	1	0	6	2	0	1	6	2	3	3	3	0	1	0	0	0	5	3	3	1	3	0	0	1	3	1	0
V$SPZ1	0.00960145	43		1	2	1	0	0	0	0	1	2	2	1	1	0	2	0	2	0	0	0	0	0	0	0	2	0	0	0	0	1	1	0	0	0	0	0	0	0	0	3	2	0	1	1	1	0	1
V$TFII				0	0	0	0	0	0	0	0	0	0	0	0	0	0	0	0	0	0	0	0	0	0	0	0	0	0	0	0	0	0	0	0	0	0	0	0	0	0	0	0	0	0	0	0	0	0
V$BRNF	0.703982	72		0	0	3	2	6	22	7	1	0	3	16	6	0	0	3	0	13	0	1	1	0	11	2	4	1	5	8	3	2	7	4	12	1	0	3	4	0	19	0	4	4	2	5	7	5	0
V$YY1F	0.993138	28		0	0	0	0	0	1	0	1	1	0	1	1	0	0	0	0	0	0	1	1	0	0	0	0	0	0	2	0	2	0	0	0	0	0	1	0	0	0	0	0	0	1	0	3	0	0
V$FKHD	0.809554	75		0	1	1	7	3	6	5	0	3	1	2	6	0	0	1	2	3	1	2	1	2	9	1	1	3	2	4	0	2	6	5	9	1	0	3	4	1	5	2	4	3	2	4	2	7	0
V$GCMF	4.8564E-4	49		0	0	1	0	0	1	0	0	1	1	1	0	1	1	1	0	1	2	0	0	1	0	0	2	1	1	0	1	0	0	0	0	1	1	0	0	1	1	2	2	0	1	0	0	1	1
V$NKX6	0.890047	40		0	0	0	2	0	2	4	0	0	0	4	0	0	0	0	0	6	0	0	0	0	3	2	1	0	3	4	0	0	2	4	4	0	0	0	2	0	4	0	0	1	0	0	0	0	0
V$AP4R	0.538139	26		0	0	0	0	0	0	0	0	1	2	0	0	0	2	0	0	0	0	2	2	0	0	0	1	0	0	0	2	0	0	0	2	3	1	0	0	0	0	0	0	1	0	0	1	2	0
V$FXRE	0.711206	16		0	0	0	0	0	0	0	0	0	0	0	0	0	0	0	1	0	0	1	1	0	0	0	0	0	0	0	0	0	1	0	0	0	0	0	1	0	0	1	0	0	0	0	0	1	0
V$HEN1				0	0	0	0	0	0	0	0	0	0	0	0	0	0	0	0	0	0	0	0	0	0	0	0	0	0	0	0	0	0	0	0	0	0	0	0	0	0	0	0	0	0	0	0	0	0
V$E4FF	0.0876531	31		0	0	0	0	1	0	0	0	0	0	1	0	0	0	0	0	0	0	1	0	0	0	0	3	1	0	0	0	0	0	0	0	1	1	1	1	0	0	0	0	0	0	0	0	0	0
V$HOMF	0.899259	57		0	0	0	5	2	6	3	0	0	0	6	4	0	0	0	0	8	1	1	1	0	6	3	2	5	1	2	0	2	7	4	6	0	0	0	0	0	6	0	0	1	0	2	1	0	0
V$OCTP				0	0	0	0	0	0	0	0	0	0	0	0	0	0	0	0	0	0	0	0	0	0	0	0	0	0	0	0	0	0	0	0	0	0	0	0	0	0	0	0	0	0	0	0	0	0
V$ZF35	0.00974351	33		0	0	1	0	0	0	0	0	0	1	1	0	0	1	0	1	1	0	0	0	0	0	0	0	0	1	1	0	1	0	1	0	0	0	0	1	0	0	2	2	0	0	0	1	0	1
V$HOXF	0.932198	82		2	1	6	7	9	6	7	0	1	1	20	7	0	0	1	1	6	0	1	1	1	7	0	3	3	5	5	1	1	6	11	7	1	0	1	4	1	8	3	6	3	3	7	5	5	0
V$MEF3	0.395339	12		0	0	0	0	0	0	0	0	0	0	1	0	0	0	0	1	0	0	0	0	0	0	0	0	0	0	0	0	0	0	0	0	0	0	0	1	0	1	0	0	0	0	0	0	0	0
V$CABL	0.998877	3		0	0	0	0	0	0	0	1	0	0	0	0	0	0	0	0	0	0	0	0	0	0	0	0	0	0	0	0	0	0	0	0	0	0	0	0	0	0	0	0	1	0	0	0	0	0
V$OCT1	0.972547	66		0	0	1	9	2	7	7	0	0	1	3	2	0	0	1	0	1	1	1	1	2	2	1	4	3	5	1	2	3	6	3	2	0	0	0	4	1	7	0	2	1	2	3	2	5	0
V$BNCF	0.378779	20		1	1	0	0	0	0	0	1	0	0	0	0	0	0	0	0	0	0	0	0	1	0	1	1	0	0	0	0	0	0	0	0	0	0	0	0	0	0	0	0	0	0	0	0	0	0
V$GKLF	0.4607	53		0	0	1	1	0	1	2	1	0	1	1	1	0	0	1	0	2	0	1	1	1	1	1	1	1	1	4	2	1	1	0	0	0	1	1	0	0	0	4	4	1	0	2	3	0	0
V$AIRE	0.961013	13		0	0	0	0	0	0	0	0	0	0	0	0	0	0	0	0	2	0	0	0	0	0	0	0	0	0	0	0	0	0	0	1	0	0	0	0	0	0	0	0	0	0	0	0	0	0
V$NEUR	0.208771	47		0	0	1	1	0	1	0	0	0	1	1	0	0	0	1	0	0	1	0	0	0	0	0	1	1	1	0	1	2	0	1	2	0	0	1	1	1	1	0	0	0	1	0	0	0	1
V$LHXF	0.121372	50		1	1	0	2	0	9	3	0	0	1	3	2	0	0	1	0	6	0	0	0	0	4	1	0	0	0	2	0	1	1	2	5	0	0	3	2	0	4	0	0	1	0	1	1	2	0
V$BRAC	0.572099	30		0	1	0	0	0	0	0	0	0	0	2	1	0	0	0	0	0	0	0	0	0	0	0	1	0	1	1	0	1	1	1	1	0	1	0	0	0	0	0	0	0	0	0	0	0	0
V$YBXF	0.0668912	31		4	2	0	1	0	0	0	1	0	0	2	0	1	1	0	0	0	0	1	1	0	0	0	3	0	0	0	1	1	1	0	0	0	0	0	0	0	0	0	0	1	2	0	0	0	0
V$AP1R	0.36136	71		2	0	0	2	1	0	0	0	1	0	6	1	1	1	0	0	2	0	0	0	0	1	0	0	3	1	3	2	3	1	2	0	1	3	4	2	2	1	4	4	2	3	1	1	2	1
V$HICF	0.00629697	30		0	0	0	0	0	0	0	3	1	0	0	0	1	1	1	0	0	0	0	0	2	0	1	1	0	0	0	0	1	0	0	0	0	1	0	0	0	0	0	0	0	0	0	0	0	0
V$RUSH	0.915505	56		0	0	1	0	1	2	4	0	0	2	2	3	0	0	2	0	1	1	0	1	0	2	2	3	2	6	0	1	1	1	0	0	1	1	1	1	2	3	0	0	2	3	3	1	3	0
V$SMAD	0.128986	44		1	1	0	0	0	0	1	0	0	0	1	0	1	1	0	0	1	0	2	2	0	0	2	2	1	1	2	1	1	0	1	0	0	0	0	0	0	1	1	0	0	1	0	0	0	0
V$BPTF	0.881471	15		0	0	0	0	1	1	0	0	0	0	0	1	0	0	0	0	0	0	0	0	0	0	0	1	0	0	0	0	0	0	0	0	0	0	0	0	0	0	1	1	0	0	0	1	0	1
V$MTF1	0.485661	14		0	1	1	0	0	0	0	0	0	0	0	0	0	0	0	1	0	0	0	0	0	0	0	0	0	0	0	0	0	0	0	0	1	1	0	0	0	0	0	0	0	1	0	0	0	0
V$TCFF	0.116818	14		0	0	0	0	0	1	0	0	0	0	0	0	0	0	0	0	0	0	0	0	0	1	0	0	0	0	0	0	0	1	0	0	0	0	0	0	0	1	0	0	0	0	1	0	0	0
V$GATA	0.997935	62		0	0	3	0	2	2	5	1	1	1	8	4	0	0	1	1	1	1	0	0	1	4	0	0	0	4	0	0	1	0	1	2	0	0	0	0	2	3	0	2	0	3	1	3	0	1
V$P53F	0.776393	44		0	0	0	2	3	2	0	3	0	1	1	0	0	1	0	0	3	2	0	0	3	0	0	1	0	4	0	0	1	0	0	2	2	1	0	0	0	0	1	0	0	0	0	1	1	0
V$PURA	0.0445167	18		2	1	0	0	0	0	0	1	2	0	0	0	1	0	0	1	0	0	0	0	2	0	0	0	0	0	0	0	0	0	0	0	0	0	0	0	0	0	1	1	0	0	0	0	0	0
V$FAST	0.949827	36		0	0	1	3	0	0	2	0	0	0	1	1	0	0	0	0	0	0	0	0	1	1	0	2	0	1	0	0	0	2	0	0	0	2	0	1	2	0	0	0	1	0	2	1	0	0
V$AHRR	1.43362E-6	63		3	2	0	0	0	0	0	3	5	2	1	0	5	4	1	1	0	0	3	3	2	0	1	1	1	0	0	0	2	0	0	0	1	1	0	1	0	1	0	0	1	1	0	1	0	3
V$PAX1	0.95231	6		0	1	0	0	0	0	0	0	0	0	0	0	0	0	0	0	0	0	0	0	0	0	0	0	0	1	0	0	2	0	0	0	0	0	0	0	0	0	0	0	0	0	0	0	0	0
V$HNF1	0.0834586	54		1	1	0	0	1	2	5	0	0	0	4	0	0	0	0	0	2	0	0	0	0	4	1	1	0	0	2	0	0	1	3	2	0	0	1	4	1	3	0	0	2	0	0	1	1	1
V$HAND	0.996746	60		0	0	0	0	0	0	0	0	2	5	3	2	0	2	3	0	2	2	1	1	0	1	0	2	2	1	0	3	2	3	0	2	6	0	2	2	1	0	0	0	0	1	2	0	0	0
V$CDEF	7.61046E-7	37		1	0	0	0	0	0	0	1	2	1	0	0	1	1	0	0	0	0	1	1	0	0	0	0	0	0	0	0	0	0	0	0	2	0	0	0	0	0	1	1	0	2	0	0	0	2
V$MYT1	0.718216	68		0	1	1	1	1	4	2	0	0	0	8	1	0	0	0	1	3	0	1	1	3	6	0	0	1	1	0	1	1	4	2	3	1	0	1	5	0	2	3	2	2	2	6	0	3	1
V$THAP	0.18638	18		0	0	0	0	0	0	1	0	0	1	0	0	0	0	1	0	0	0	0	0	0	0	0	1	0	0	0	0	0	0	0	0	1	0	0	0	1	0	0	0	0	0	1	0	2	0
V$RBIT	0.768192	22		0	0	0	1	0	2	2	0	0	0	0	0	0	0	0	0	3	0	0	0	0	2	1	0	0	0	2	0	0	0	2	2	0	0	0	0	0	1	0	0	0	0	0	0	0	0
V$HOXC	0.220915	63		0	0	2	1	3	1	1	0	0	1	1	1	0	0	1	0	2	0	1	0	0	5	2	0	0	3	1	1	4	0	0	3	2	1	0	1	1	3	1	1	3	1	0	1	2	0
V$CREB	0.43062	81		1	0	0	2	2	2	3	0	3	0	6	2	3	1	0	2	3	1	1	1	1	4	1	6	3	1	1	2	3	3	1	1	3	7	6	3	3	3	1	2	2	1	3	0	6	0
V$PAX3	0.888891	24		0	0	0	0	0	0	0	0	0	0	1	1	0	0	0	1	0	1	1	0	0	0	0	0	2	0	1	0	1	0	0	0	0	0	1	0	0	0	1	3	0	0	0	0	1	0
V$MYBL	0.306785	71		1	3	1	2	1	0	1	0	2	0	5	0	3	2	0	1	1	3	2	2	0	1	1	2	0	0	1	0	3	2	1	1	0	2	0	4	0	5	2	3	0	3	1	1	0	1
V$SNAP	0.788049	46		0	0	0	1	1	1	1	0	0	4	5	1	0	0	5	0	0	0	0	0	0	1	1	0	1	1	1	0	3	1	1	1	0	0	1	3	1	0	0	1	0	0	2	0	0	0
V$PAX4	0.00633968	1		0	0	0	0	0	0	0	0	0	0	0	0	0	0	0	0	0	0	0	0	0	0	0	0	0	0	0	0	0	0	0	0	0	0	0	0	0	0	0	0	0	0	0	0	0	0
V$SREB	0.566273	24		0	0	2	0	0	0	0	0	1	0	1	0	0	0	1	0	0	0	0	0	0	0	0	1	1	0	1	0	2	0	0	0	0	0	1	0	0	0	1	0	0	0	0	1	0	0
V$HIFF	0.41735	32		0	0	0	0	0	0	0	0	0	1	0	1	0	0	1	0	0	2	0	0	0	0	0	1	1	0	1	0	0	0	0	0	0	0	2	0	0	0	1	0	0	3	0	0	0	1
V$NF1F	0.200158	44		3	1	1	0	0	0	0	0	0	0	1	0	0	0	0	0	0	3	2	2	0	0	0	1	0	0	2	3	2	0	0	3	0	2	0	2	0	0	0	0	0	0	0	0	0	0
V$SORY	0.969058	70		2	0	4	1	6	5	5	0	0	0	11	4	0	0	0	1	0	0	1	1	1	3	1	2	0	0	1	1	1	4	2	5	0	2	2	2	5	2	0	3	0	3	6	1	4	0
V$CLOX	0.715201	76		3	2	6	1	2	4	5	0	0	0	5	2	0	0	0	0	2	2	3	2	1	5	1	3	0	5	0	4	2	4	3	5	0	0	0	2	2	3	0	0	2	3	1	2	4	1
V$EVI1	0.983203	71		0	1	4	2	3	3	3	0	2	0	3	3	2	2	1	1	0	0	0	0	0	6	0	1	1	1	3	4	3	1	5	4	1	1	3	0	1	1	1	3	0	2	3	1	0	1
V$HAML	0.545917	38		0	0	1	0	1	0	0	0	1	0	0	0	0	0	0	0	0	0	0	0	0	0	1	2	1	1	1	0	1	1	1	0	0	1	1	1	1	1	0	0	0	1	0	1	0	0
V$GRHL	0.0106959	38		1	1	1	1	1	3	3	0	1	0	0	0	0	0	0	0	1	1	0	0	0	0	0	0	0	0	0	0	1	2	1	0	1	0	0	0	1	2	0	0	1	1	1	0	1	0
V$STAT	0.906456	57		1	1	1	1	1	3	1	2	1	0	3	2	3	2	0	0	2	0	1	2	0	4	0	0	1	0	1	0	0	3	2	0	0	2	2	0	0	1	0	0	4	1	4	2	4	0
V$ETSF	0.935548	87		3	1	1	1	2	0	1	9	3	6	8	4	0	1	7	4	3	4	2	3	3	0	5	0	0	2	2	4	2	3	5	1	3	3	1	0	5	2	7	6	3	4	3	2	0	2
V$OCTB	0.583676	25		1	1	1	2	1	0	1	0	0	0	2	0	0	0	0	0	0	0	0	0	0	2	1	0	1	0	0	0	0	0	1	1	0	0	1	1	0	1	0	0	1	0	0	0	0	0
V$LEFF	0.987839	38		0	0	0	2	0	1	0	0	0	0	1	1	0	0	0	0	1	0	3	2	1	2	0	0	0	0	3	3	1	0	1	0	0	1	2	1	1	1	0	0	0	0	2	2	2	0
V$CP2F	0.330702	41		1	1	0	2	0	0	0	0	0	0	4	1	0	0	0	0	0	2	0	0	0	0	0	0	1	0	0	0	1	0	0	0	2	0	1	0	0	0	0	0	1	0	1	0	0	0
V$TALE	0.482115	44		0	1	1	1	0	0	0	0	1	0	0	0	1	1	0	1	1	0	0	0	0	2	2	0	0	0	0	0	1	2	0	1	0	2	0	1	1	0	1	1	2	0	0	0	2	0
V$GLIF	0.00159628	62		2	2	1	0	1	0	0	2	2	1	2	0	2	2	0	1	0	0	3	4	0	0	0	2	2	0	2	1	2	0	0	0	1	0	0	0	0	0	4	1	1	2	0	2	0	2
V$CDXF	0.908979	31		0	0	0	0	1	2	0	0	0	1	2	0	0	0	1	1	3	0	0	0	0	6	1	0	0	1	0	0	0	0	0	3	0	0	0	0	0	3	0	0	0	0	0	0	0	0
V$MOKF	0.41285	51		2	3	2	0	0	0	0	0	1	0	3	0	1	1	1	0	2	1	0	0	2	0	1	0	2	2	1	0	2	0	1	0	0	0	2	0	0	1	0	0	1	0	0	1	1	1
V$SATB	0.888086	20		0	0	0	1	1	0	2	0	0	1	1	0	0	0	1	0	1	0	0	0	0	2	1	0	0	0	0	0	0	2	0	0	0	0	0	0	0	1	0	0	0	0	2	0	1	0
V$NOLF	0.570704	35		4	3	0	0	0	0	0	1	3	2	1	0	4	4	1	4	0	1	0	0	3	0	0	1	0	0	0	0	0	0	0	0	0	0	0	0	0	0	0	0	1	1	0	0	0	0
V$ZNFP	0.510481	24		1	1	0	0	0	0	0	0	0	0	2	0	0	0	0	0	0	0	0	0	0	0	0	0	0	0	0	0	0	0	0	0	0	1	0	0	0	0	0	0	0	1	1	0	0	1
V$NKXH	0.777528	81		0	3	0	7	2	9	4	0	0	0	9	3	1	1	0	3	1	1	1	1	0	12	2	1	1	5	3	0	2	6	8	4	0	1	2	5	1	7	3	3	3	2	1	5	7	1
V$PAX6	0.453814	70		3	3	1	1	1	2	1	0	0	0	5	1	0	0	0	1	2	2	1	1	0	1	1	1	0	2	2	0	0	0	2	0	0	0	0	2	1	1	3	4	1	2	0	1	0	0
V$RBP2	0.477987	18		0	0	0	0	0	0	0	1	0	0	0	0	0	0	0	0	0	0	0	0	1	0	0	0	0	0	0	0	0	0	0	0	0	1	0	0	0	0	0	0	0	0	0	0	0	0
V$MEF2	0.903969	41		0	1	1	1	2	2	2	0	1	1	0	3	0	0	1	0	0	0	0	0	0	4	0	0	0	0	2	0	0	1	0	1	0	0	2	1	0	2	0	0	1	0	0	0	0	0
V$WHNF	0.157581	29		0	1	0	0	0	0	0	4	2	0	0	0	3	1	0	1	0	1	0	0	1	0	1	1	1	0	0	0	1	0	1	1	1	0	0	0	0	0	0	0	0	0	0	0	0	1
V$AP2F	0.0163478	37		2	2	1	0	0	0	0	0	1	0	1	0	0	0	0	1	0	0	0	0	1	0	0	0	2	0	0	0	3	0	0	0	0	0	0	0	0	0	1	1	2	1	0	0	0	0
V$BCL6	0.27849	47		0	0	0	1	1	0	0	2	1	0	0	1	0	0	0	1	0	0	1	1	0	1	0	1	0	0	1	0	0	1	0	0	1	0	1	1	0	0	1	1	0	1	2	0	1	1
V$PDX1	0.617329	46		0	0	1	1	1	2	3	0	0	0	2	1	0	0	0	0	1	0	0	0	0	4	1	1	1	2	0	0	2	2	1	1	0	0	0	2	0	6	0	0	2	0	1	2	1	0
V$INSM	0.010764	46		1	1	0	0	0	0	0	3	2	1	3	0	1	1	1	1	0	0	0	0	1	0	1	0	0	0	1	0	1	0	0	0	0	0	0	1	1	0	0	0	1	0	0	0	0	2
V$EREF	0.814576	32		0	0	0	0	2	1	0	0	1	0	2	0	0	0	0	0	0	0	1	0	0	0	1	0	0	0	1	1	0	0	0	0	0	0	0	2	0	0	0	1	0	0	1	0	2	0
V$CEBP	0.739303	42		0	0	0	0	1	1	1	0	0	1	3	2	0	0	1	0	1	0	2	2	0	1	0	0	1	1	1	2	1	2	0	0	0	0	1	1	0	0	0	0	0	0	0	0	2	0
V$CHRE	0.0229996	24		1	0	0	0	0	0	0	1	1	1	0	0	1	1	1	0	0	0	0	0	0	0	0	0	0	0	0	0	0	0	0	0	0	0	0	0	0	0	0	0	0	0	0	0	0	0
V$IRFF	0.799222	61		0	2	0	1	0	0	3	0	1	1	9	0	1	1	1	0	0	1	4	4	0	4	2	1	0	0	1	1	1	2	0	1	0	0	1	3	4	3	0	1	0	0	3	3	0	1
V$PAX2	0.173941	41		0	0	0	0	1	1	0	0	0	0	1	1	0	0	0	0	0	0	0	0	0	1	0	1	1	0	1	0	1	1	1	1	0	0	1	2	2	0	2	2	1	1	0	1	0	1
V$PAX9	0.0864789	20		0	2	0	1	1	0	0	0	1	0	1	0	1	1	0	0	0	0	1	1	0	0	0	0	0	0	0	0	0	0	0	0	1	0	0	0	0	0	0	0	0	0	0	0	0	1
V$HNF6	0.988818	33		0	0	1	0	2	3	1	0	0	0	3	0	0	0	0	0	1	1	0	0	0	0	0	0	1	0	1	0	0	1	0	3	0	0	1	1	0	0	0	0	0	0	0	2	2	0
V$OAZF	0.0555321	30		0	2	0	0	0	0	0	2	1	0	0	0	1	1	0	1	0	0	0	0	0	0	0	1	1	0	1	0	0	0	0	0	1	0	0	0	0	0	1	0	0	0	1	0	0	0
V$XBBF	0.0386509	61		0	1	0	0	0	0	0	1	3	1	5	0	3	3	0	1	2	2	2	1	1	0	1	3	1	2	4	0	4	0	1	1	1	0	1	2	1	1	1	0	2	0	0	0	2	1
V$PAX8	0.257588	32		0	0	0	1	0	0	0	0	0	1	0	0	0	0	1	0	1	0	0	0	0	0	0	1	0	0	0	0	0	0	1	0	0	2	1	1	1	2	1	1	0	0	0	0	1	0
V$HOXH	0.955245	37		0	0	1	0	1	0	2	0	0	1	0	0	0	0	1	0	0	1	0	0	0	2	2	0	1	1	1	1	0	0	0	0	0	1	0	0	0	3	0	0	2	0	1	2	0	0
V$MITF	0.763963	19		0	0	0	0	0	0	0	0	0	0	1	0	0	0	0	0	1	0	0	0	0	1	0	0	0	1	0	1	1	3	0	0	0	0	0	0	0	0	0	0	0	0	1	0	0	0
V$ZBPF	0.00262844	69		12	10	1	0	0	0	1	18	20	13	0	0	12	11	8	9	0	1	2	2	5	0	1	6	0	0	2	1	5	0	0	0	5	0	0	0	1	0	13	8	6	5	0	2	0	15
V$E2FF	0.0425827	70		11	6	2	3	0	0	0	5	10	2	1	0	8	7	2	7	0	4	0	1	4	0	5	9	0	2	1	0	7	1	0	0	5	0	1	0	1	0	1	0	1	7	3	1	0	4
V$NR2F	0.312046	86		1	1	0	1	2	4	2	0	2	2	8	5	1	2	2	1	2	1	3	3	1	0	3	2	0	5	4	3	5	1	0	1	3	0	5	2	2	3	1	0	3	5	2	3	1	0
V$PLZF	0.991338	22		0	0	1	0	0	0	6	0	0	0	0	0	0	0	0	0	0	0	0	0	0	1	0	0	0	0	0	0	0	0	0	0	0	0	1	1	0	0	0	0	0	0	0	0	1	0
V$GREF	0.99833	47		1	2	0	1	3	1	0	4	0	0	2	1	0	0	0	0	1	1	1	1	0	0	3	0	3	0	0	0	0	1	1	0	0	0	0	1	4	0	0	0	2	0	2	1	0	0
V$EKLF	0.00847753	66		8	5	2	0	0	0	0	8	6	6	0	0	3	4	4	3	1	0	0	0	1	0	2	3	0	0	1	0	2	1	0	0	4	1	2	1	1	1	7	5	2	3	0	2	0	7
V$DICE	0.33678	29		0	0	1	1	0	0	0	0	0	0	0	0	0	0	0	0	0	0	0	0	1	0	0	2	0	0	0	0	0	0	0	0	1	0	0	0	2	1	1	1	0	0	0	1	0	1
V$DMTF	0.764585	17		1	0	0	0	0	1	0	1	0	0	0	0	0	0	0	0	1	0	0	0	0	0	0	0	0	0	1	0	0	0	0	0	0	2	0	0	0	0	0	2	0	0	0	0	0	0
V$NBRE	0.369676	24		0	0	0	0	1	2	1	0	0	1	1	0	0	0	1	0	0	0	1	0	0	0	0	0	0	0	1	0	1	0	0	1	0	0	0	0	1	0	0	0	0	1	1	0	1	0
V$PRDF	0.0264838	52		0	0	1	1	0	0	2	0	2	0	3	2	1	1	0	1	1	0	0	1	0	0	0	0	0	0	1	2	1	2	0	2	0	0	1	0	1	1	1	1	2	3	1	1	0	1
V$GUCE	0.736674	2		0	0	0	0	0	0	0	0	0	0	0	0	0	0	0	0	0	0	0	0	0	0	0	0	0	0	0	0	0	0	0	0	0	0	0	0	0	0	1	1	0	0	0	0	0	0
V$RREB	0.00356615	49		2	3	0	0	0	0	1	1	3	2	0	0	2	1	1	1	0	0	0	0	0	2	0	2	0	1	0	1	1	0	0	1	1	1	0	0	2	0	4	1	0	0	0	1	0	1
V$BARB	0.71109	28		0	1	0	0	0	0	1	0	0	3	1	0	0	0	4	0	1	0	0	0	1	0	0	0	1	1	0	1	0	0	0	0	0	0	0	1	1	0	0	0	0	1	1	0	0	0
V$CHRF	0.554407	33		0	0	0	2	1	1	1	1	0	0	2	0	0	0	0	0	0	0	0	0	0	2	1	0	0	0	1	2	2	1	1	2	0	1	1	0	0	2	0	0	0	0	3	1	1	1
V$RXRF	0.523866	85		4	2	2	2	4	2	1	1	1	4	4	0	1	1	4	4	1	1	0	0	0	1	3	1	3	3	3	2	4	1	3	1	5	3	7	1	1	1	4	2	1	1	0	3	5	2
V$HEAT	0.942878	60		0	0	5	5	1	3	2	2	0	0	0	1	0	0	1	0	1	0	3	3	0	1	3	1	0	2	3	1	0	0	0	0	0	0	1	4	1	1	1	3	2	3	3	0	1	1
V$DEAF	9.04658E-4	36		2	1	1	0	0	0	0	1	0	0	0	0	0	0	1	1	0	0	2	2	1	0	1	0	0	0	1	0	3	0	0	0	0	0	0	0	0	0	0	0	0	1	0	1	0	1
V$STAF	0.159169	46		1	1	0	1	1	0	0	2	2	2	0	0	0	1	1	0	0	0	0	0	2	0	0	0	0	0	1	0	3	0	2	1	1	0	0	0	1	0	1	0	1	0	1	1	2	2
V$CHOP	0.536716	9		0	0	0	1	0	0	0	0	0	0	1	0	0	0	0	0	0	0	0	0	0	0	0	0	0	2	0	0	0	0	0	0	0	0	0	0	0	0	0	0	0	0	0	0	0	0
V$RP58	0.410831	21		0	0	0	1	0	1	0	0	0	2	2	1	0	1	1	0	0	1	0	0	0	0	0	1	1	0	0	0	1	0	0	1	0	0	0	1	0	0	0	0	0	0	1	0	0	0
V$CTCF	1.21858E-5	45		5	1	0	0	0	0	0	10	7	4	0	0	6	6	4	7	0	0	1	1	1	0	1	1	0	0	0	0	3	0	0	0	11	0	0	0	0	0	0	0	1	2	0	0	0	7
V$SF1F	0.487227	35		0	0	1	0	0	0	0	1	0	1	1	0	0	0	1	1	0	1	0	0	0	0	0	0	0	1	0	1	3	0	0	1	0	0	0	1	0	1	0	0	0	0	1	1	1	0
V$CAAT	0.396764	66		4	2	2	1	0	0	0	0	1	1	3	1	1	1	1	0	0	0	4	2	1	0	2	3	0	1	1	0	1	0	2	0	1	0	0	0	0	1	0	0	1	3	0	0	2	1
V$RBPF	0.375897	40		2	2	0	0	0	1	0	0	0	0	2	2	0	0	0	0	2	2	2	2	1	1	0	0	0	1	1	2	0	1	1	1	0	0	0	0	2	0	0	0	1	0	1	0	0	0
V$SP1F	0.0583494	71		15	9	2	0	0	0	1	18	14	9	0	0	11	7	8	3	0	1	2	3	2	0	3	5	1	0	0	0	6	0	0	0	8	2	1	2	2	0	3	0	2	8	1	2	1	17
V$BTBF	0.939293	11		0	0	0	0	0	0	0	0	0	0	0	0	0	0	0	0	1	0	0	0	0	0	0	0	0	0	1	0	0	0	0	0	0	1	0	0	0	0	0	0	1	0	0	1	0	0
V$PARF	0.74831	65		0	0	0	2	3	3	3	0	0	0	2	3	0	0	0	0	3	0	1	1	1	7	1	0	2	1	1	1	0	6	1	1	1	2	2	4	1	7	0	2	2	0	4	2	7	0
V$EBOX	0.00862607	65		2	1	0	1	0	0	0	1	7	2	0	0	3	2	1	1	0	2	2	2	1	1	0	2	0	2	0	0	3	2	0	0	1	0	2	0	2	2	0	1	0	3	1	1	0	2
V$TEAF	0.570704	35		0	0	0	0	0	0	1	0	0	0	2	0	0	0	0	1	0	0	1	0	1	0	1	0	0	0	0	1	1	1	1	1	0	0	0	0	1	0	0	0	0	0	2	0	1	0
V$GABF	0.0136125	27		1	2	0	0	0	0	0	1	1	1	2	0	0	1	0	0	0	0	0	0	1	0	0	0	0	0	1	0	0	0	0	0	0	0	0	0	0	0	25	27	1	0	0	0	0	2
V$SRFF	0.975243	41		0	0	0	2	0	1	2	0	0	2	2	1	0	0	2	1	0	1	0	0	0	2	0	0	0	1	0	0	2	0	0	2	0	2	0	0	0	0	0	1	2	0	0	0	4	1
V$ZFIA	0.233778	19		0	1	0	0	0	0	0	0	1	0	0	0	1	1	0	0	0	0	0	1	0	0	1	0	0	0	1	0	0	0	0	1	0	1	0	0	0	0	0	0	0	0	1	2	0	0
V$RU49	0.868607	19		0	0	0	0	2	0	1	0	0	0	0	2	0	0	0	0	1	0	0	0	0	0	1	0	0	0	1	0	0	0	0	1	0	0	1	1	0	0	0	0	2	1	0	1	0	0
V$NFKB	0.662574	48		2	2	0	0	0	1	0	4	1	4	2	0	0	2	4	1	0	1	0	1	1	0	1	1	0	0	0	2	0	0	0	0	0	1	0	0	0	0	3	0	0	0	0	1	0	0
V$MZF1	0.00925269	67		3	2	3	0	0	1	0	9	4	3	3	0	0	1	2	0	0	1	0	1	3	0	0	0	0	1	2	2	3	0	4	0	1	1	0	0	0	0	5	5	2	3	4	3	0	2
V$AP1F	0.554407	33		0	0	0	0	1	0	0	0	0	0	2	1	0	0	0	0	0	0	0	0	0	0	3	0	2	0	0	2	0	0	0	0	0	0	0	0	0	2	0	1	0	2	1	0	0	0
V$RORA	0.928471	48		0	1	0	1	2	1	0	0	0	1	2	2	1	1	1	0	0	1	1	0	1	2	0	0	0	3	1	0	1	1	0	0	1	0	1	2	0	1	0	0	1	0	0	1	1	0
V$ATBF	0.857162	26		0	0	0	0	0	3	5	0	0	0	1	1	0	0	0	0	3	0	0	0	0	3	0	0	0	1	1	0	1	0	0	3	0	0	1	0	0	2	0	0	0	0	0	0	0	0
V$PERO	0.374553	52		0	0	0	2	1	1	1	1	0	0	3	0	0	0	0	0	0	1	1	0	0	0	1	0	0	1	2	2	3	0	0	0	2	0	1	1	1	0	1	0	0	4	3	1	0	1
V$GFI1	0.665699	35		0	0	2	1	0	1	2	0	0	0	1	1	0	0	0	0	1	0	1	1	0	2	0	0	0	1	0	1	0	0	0	1	0	0	0	1	1	0	0	0	1	0	1	1	0	0
V$HMTB	0.847403	31		0	0	3	0	1	0	0	0	0	0	2	1	0	0	0	0	0	0	1	1	0	1	2	0	0	0	0	2	0	0	0	3	0	0	0	0	1	0	1	1	0	0	2	0	1	0
V$GZF1	0.918905	16		0	0	0	0	0	0	0	0	0	0	1	0	0	0	0	0	0	0	0	0	0	0	0	0	1	1	2	0	1	1	0	0	1	1	0	0	0	0	0	0	0	1	0	0	0	0
V$CIZF	0.184249	32		0	2	1	1	4	0	0	0	1	0	0	1	1	1	0	0	0	0	1	1	0	0	1	0	0	1	0	0	1	2	0	0	0	0	0	0	0	0	0	0	0	0	0	1	2	1
V$MAZF	0.0152614	58		6	5	1	0	0	0	0	9	7	4	0	0	4	1	5	3	0	0	1	1	2	0	1	2	0	0	0	1	3	0	0	0	4	0	0	0	1	0	7	4	1	6	0	0	0	5
V$PBXC	0.847614	40		1	1	0	0	0	0	1	0	0	0	1	0	0	0	0	0	2	0	1	1	0	1	3	1	0	0	0	0	0	1	1	1	0	0	0	2	2	0	1	1	3	0	0	1	1	0
V$PIT1	0.781913	15		0	0	0	0	0	0	0	0	0	0	1	0	0	0	0	0	0	0	0	0	0	1	0	0	0	2	0	0	0	0	0	1	0	0	0	0	0	1	0	0	1	0	0	0	0	0
V$HESF	0.0182926	54		3	1	0	0	0	0	0	4	2	2	0	0	0	2	1	2	1	0	2	3	1	1	0	2	1	0	0	1	0	2	0	0	1	2	1	0	0	0	0	0	0	3	1	0	0	1
V$NFAT	0.18843	60		0	0	2	4	1	0	1	0	0	1	3	4	0	0	1	0	1	2	2	3	0	0	1	3	1	1	2	2	2	0	0	0	1	2	0	0	0	1	0	1	1	2	1	1	1	1
V$NRSF	0.00579269	44		1	1	1	1	0	0	0	6	3	1	0	0	2	2	1	0	0	0	1	1	0	0	0	0	0	0	0	0	5	0	0	0	2	1	0	1	1	0	1	1	0	4	0	0	0	2
V$ZFHX	0.953701	45		1	1	1	1	1	0	1	0	0	0	1	1	1	1	0	0	0	0	1	1	0	1	3	0	0	2	0	0	1	0	0	0	1	3	0	0	0	0	0	0	0	4	0	1	1	0
V$EGRF	0.00167657	71		21	8	0	0	0	0	0	14	16	13	0	0	14	16	6	9	0	1	5	5	6	0	1	3	0	0	0	0	6	2	0	0	16	1	1	1	0	0	5	2	4	11	1	1	0	16
V$PTF1	0.63203	22		0	0	0	0	2	0	1	0	0	0	2	2	0	0	0	0	0	1	0	0	0	0	0	0	0	0	0	0	0	1	0	0	1	0	0	0	0	0	0	0	2	0	0	0	0	1
V$CART	0.546916	27		0	0	0	0	1	2	2	0	0	0	2	0	0	0	0	0	2	0	0	0	0	5	0	2	0	1	1	0	0	1	0	3	0	0	0	2	0	1	0	0	0	0	0	0	0	0
V$MYOD	0.624904	45		0	0	1	0	0	0	0	0	5	3	1	1	2	4	1	0	0	1	3	3	0	0	0	1	0	1	1	1	1	0	0	0	6	3	0	0	0	0	0	0	0	0	0	0	2	0
V$IKRS	0.698245	44		0	1	0	0	1	2	0	0	0	0	3	0	0	0	0	1	2	0	0	0	2	1	1	1	1	2	1	1	1	0	1	0	0	0	0	0	0	1	1	0	0	0	3	0	0	0
V$ARID	0.327843	7		0	0	0	0	0	1	0	0	0	0	0	0	0	0	0	0	0	0	0	0	0	0	0	0	0	0	0	1	0	0	0	1	0	0	0	0	0	0	0	1	0	0	0	0	0	0
V$NRF1	1.52749E-5	37		14	2	0	0	0	0	0	10	10	2	0	0	8	4	0	9	0	0	6	6	2	0	0	0	0	0	0	0	2	0	0	0	8	0	0	0	0	0	0	0	0	8	0	0	0	3
V$PLAG	7.36883E-4	46		3	1	0	0	0	0	0	1	2	1	0	0	1	2	0	1	0	0	0	0	2	0	1	2	0	0	0	1	0	0	0	0	2	0	0	1	0	0	4	4	0	4	0	0	0	5
V$PAX5	0.0740039	52		4	4	0	0	0	0	0	1	5	1	0	0	2	1	0	1	1	3	0	0	0	0	0	0	0	0	0	0	5	0	1	0	1	2	2	1	0	0	1	0	1	2	0	0	0	2
V$ZF5F	0.00144498	35		3	0	0	0	0	0	0	1	5	0	0	0	1	0	0	4	0	0	2	2	1	0	2	1	0	0	0	0	1	0	0	0	2	0	0	0	0	0	0	0	0	1	0	0	0	1
[truncated: 100 more columns]
