# Supplementary material for: STOX1 Overexpression in Choriocarcinoma Cells Mimics Transcriptional Alterations Observed in Preeclamptic Placentas
Source: PLoS One. 2008 Dec 11;3(12):e3905. doi: 10.1371/journal.pone.0003905 (PMC2592700; doi:10.1371/journal.pone.0003905)
Supplement: Table S2 — A and S2B: Data for correlation analysis transcriptomic data from two experiments (effects of preeclampsia, and effect of gestation time) compared with STOX1 effects (0.24 MB XLS) [file pone.0003905.s002.xls]

## Sheet: Suppl Table IIa
GDS2080																Data from Nishizawa, (2007)												Present study
ID_REF	GSM106249	GSM106250	GSM106274	GSM106275	GSM106276	GSM106277	GSM106278	GSM106279	GSM106280	GSM106281	GSM106282	GSM106283	GSM106284	GSM106285		Student t test						ANNOTATION
disease state	normal	normal	normal	normal	early onset preeclampsia	early onset preeclampsia	early onset preeclampsia	early onset preeclampsia	early onset preeclampsia	late onset preeclampsia	late onset preeclampsia	late onset preeclampsia	late onset preeclampsia	late onset preeclampsia	Induction ratio	Normal/all	Normal/early	Normal/late										STOX induced	log(STOX induced	Nishizawa	Nishizawa log
13083	0.184	0.0659	-0.0826	-0.0775	0.423	0.282	0.376	0.235	0.581	-0.0903	0.0168	0.089	0.555	0.123	1.72425	0.0381353	0.00249102	0.212241	Induced	1	149	gene symbol=[HMOX1], gene=[heme oxygenase (decycling) 1], gb=[NM_002133], gi=[4504436]			13	19	HMOX1	0.214329	-2.2221	1.72425	0.785968
8391	0.141	0.0844	0.0396	0.0118	0.149	0.149	0.55	0.357	1.02	0.724	0.525	0.344	0.327	0.576	2.52872	0.00641012	0.0410813	0.000888947	Induced	1		gene symbol=[AQP1], gene=[aquaporin 1 (Colton blood group)], gb=[NM_198098], gi=[37694061]			13	18	AQP1	0.220256	-2.18275	2.52872	1.3384
2891	-0.402	0.155	-0.0718	-0.155	0.355	1.24	0.605	0.811	0.346	0.477	0.372	0.309	0.0833	0.737	4.48725	0.00185627	0.00386718	0.00695592	Induced	1		gene symbol=[HTRA4], gene=[HtrA serine peptidase 4], gb=[NM_153692], gi=[30410026]			13	19	HTRA4	0.26183	-1.9333	4.48725	2.16583
39908	0.319	0.309	0.393	0.231	0.218	-0.139	-0.0189	0.021	0.0353	0.451	0.156	0.284	0	0.466	0.682873	0.0732875	0.002416	0.351447	Repressed	-1		gene symbol=[MRS2L], gene=[MRS2-like, magnesium homeostasis factor (S. cerevisiae)], gb=[AL699441], gi=[19619981]			13	19	MRS2L	0.302083	-1.72698	0.682873	-0.550311
2844	0.184	0.0624	0.0177	0.0295	-0.165	-0.181	-0.176	-0.222	-0.0732	-0.159	-0.165	-0.123	0.0631	-0.149	0.618857	0.000382774	0.000480244	0.00937917	Repressed	-1		gene symbol=[DOK3], gene=[docking protein 3], gb=[AK097259], gi=[21756952]			13	18	DOK3	0.350965	-1.5106	0.618857	-0.692323
36902	0.22	0.109	0.165	0.21	0.0563	-0.597	-0.321	-0.463	-0.446	-0.533	-0.446	-0.324	-0.603	-0.232	0.2711	6.56957e-05	0.0022069	6.47568e-05	Repressed	-1		gene symbol=[GABRE], gene=[gamma-aminobutyric acid (GABA) A receptor, epsilon], gb=[NM_021990], gi=[52426765]			13	19	GABRE	0.431639	-1.2121	0.2711	-1.8831
2140	-0.0288	0.136	0.158	0.0875	-0.144	-0.355	-0.211	-0.357	-0.328	-0.24	-0.175	-0.00325	-0.365	-0.0188	0.492176	0.000641681	0.000266998	0.0114317	Repressed	-1		gene symbol=[MBD6], gene=[methyl-CpG binding domain protein 6], gb=[AK093078], gi=[21751829]			13	18	MBD6	0.443001	-1.17462	0.492176	-1.02276
9423	-0.0465	-0.0134	-0.12	-0.28	-0.129	0.0222	0.0784	0.0363	0.00805	0.168	0.749	0.204	0.0452	0.286	1.82722	0.032142	0.0572607	0.0140091	Induced	1		gene symbol=[DLX5], gene=[distal-less homeobox 5], gb=[NM_005221], gi=[84043959]			13	18	DLX5	0.455604	-1.13415	1.82722	0.869648
24892	-0.0843	-0.117	0.197	0.146	-0.159	-0.1	-0.108	-0.086	-0.138	0.162	-0.0746	0.329	0.292	0.207	0.99315	0.489296	0.0343131	0.104105	Repressed	-1		gene symbol=[MUM1], gene=[melanoma associated antigen (mutated) 1], gb=[NM_032853], gi=[31652258]			13	18	MUM1	0.495886	-1.01192	0.99315	-0.00991596
18627	0.196	-0.151	0.027	0.737	1.37	0.643	0.734	0.0868	0.637	0.216	0.0313	0.573	0.786	0.284	2.15705	0.0899403	0.0647034	0.231956	Induced	1		gene symbol=[SLCO4A1], gene=[solute carrier organic anion transporter family, member 4A1], gb=[NM_016354], gi=[39777593]			13	21	SLCO4A1	0.501502	-0.995674	2.15705	1.10906
29615	0.262	0.117	0.376	0.146	0.0551	0.129	0	0.0335	0.0468	0.421	0.3	0.413	0.429	0.294	0.970264	0.447424	0.00985993	0.025916	Repressed	-1		gene symbol=[MREG], gene=[melanoregulin], gb=[NM_018000], gi=[124487398]			13	18	MREG	0.519757	-0.944091	0.970264	-0.0435505
26232	-0.173	-0.247	-0.271	-0.28	-0.0277	0.0829	0.0527	0.0629	-0.216	-0.0977	0.15	-0.165	-0.244	-0.143	1.54262	0.0112904	0.00471653	0.0562556	Induced	1		gene symbol=[NDUFS2], gene=[NADH dehydrogenase (ubiquinone) Fe-S protein 2, 49kDa (NADH-coenzyme Q reductase)], gb=[NM_004550], gi=[34147556]			13	20	NDUFS2	0.55159	-0.858331	1.54262	0.625386
30649	-0.207	-0.286	-0.234	-0.157	0.162	0	-0.0165	0.127	0.0992	-0.238	-0.41	0.285	-0.00984	0.124	1.71114	0.0235257	0.000190706	0.134934	Induced	1		gene symbol=[ATAD3B], gene=[ATPase family, AAA domain containing 3B], gb=[AB033099], gi=[6382027]			13	20	ATAD3B	0.568627	-0.814444	1.71114	0.774959
30135	-0.0739	-0.228	0.0326	-0.1	0.23	0.231	0.147	0.221	-0.0148	-0.133	-0.0466	0.166	-0.0174	-0.319	1.3764	0.0941855	0.00445197	0.41587	Induced	1		gene symbol=[PDCD11], gene=[programmed cell death 11], gb=[AY007124], gi=[9956021]			13	20	PDCD11	0.579779	-0.786425	1.3764	0.460901
38129	-0.0667	-0.506	-0.044	-0.00709	-0.0135	0.26	0.203	0.28	-0.0116	0.144	0.58	0.162	-0.0116	0.149	2.13834	0.00711614	0.0250084	0.0249556	Induced	1		gene symbol=[SLC30A1], gene=[solute carrier family 30 (zinc transporter), member 1], gb=[U68494], gi=[1546096]			13	21	SLC30A1	0.583531	-0.777118	2.13834	1.09649
19808	0.0892	-0.365	-0.155	-0.18	0.0272	0.014	0.0078	0.0987	-0.0395	-0.181	0.124	-0.248	-0.332	-0.978	1.00466	0.495524	0.0407221	0.232979	Induced	1		gene symbol=[TBRG4], gene=[transforming growth factor beta regulator 4], gb=[AB023165], gi=[4589539]			13	19	TBRG4	0.587302	-0.767827	1.00466	0.00671029
3443	0.116	-0.262	-0.139	-0.204	0.206	0.0427	0.245	0.315	0.29	0.512	0.29	-0.409	-0.192	-0.341	1.65242	0.106806	0.00358836	0.339929	Induced	1		gene symbol=[C8orf79], gene=[chromosome 8 open reading frame 79], gb=[NM_020844], gi=[153251912]			13	21	C8orf79	0.652893	-0.615082	1.65242	0.724579
8817	-0.00535	-0.104	-0.14	-0.0597	0.264	0.252	0.106	0.0526	0.389	0.238	0.272	-0.0388	-0.533	-0.273	1.413	0.164458	0.00264787	0.477399	Induced	1		gene symbol=[ERGIC1], gene=[endoplasmic reticulum-golgi intermediate compartment (ERGIC) 1], gb=[NM_020462], gi=[24308198]			13	20	ERGIC1	0.657001	-0.606033	1.413	0.498763
44019	-0.0561	-0.363	-0.166	0.403	-0.173	-0.138	-0.154	-0.207	-0.251	0.146	-0.493	0.041	0.301	0.235	0.946728	0.441549	0.18392	0.341435	Repressed	-1		gene symbol=[SF1], gene=[splicing factor 1], gb=[D26122], gi=[473832]			13	17	SF1	0.666667	-0.584963	0.946728	-0.0789788
40242	-0.019	-0.242	-0.205	-0.11	-0.0602	0.159	0.126	0.235	0.186	-0.00894	0.534	-0.0705	-0.0732	-0.185	1.69128	0.031257	0.00345272	0.131337	Induced	1		gene symbol=[FKBP4], gene=[FK506 binding protein 4, 59kDa], gb=[NM_002014], gi=[17149846]			13	19	FKBP4	0.680672	-0.554968	1.69128	0.758117
4746	-0.013	-0.165	-0.0708	-0.0717	0.127	0.678	0.206	0.24	0.227	0.379	0.361	-0.00541	-0.152	0.0795	1.96849	0.0146418	0.00661204	0.0611606	Induced	1		gene symbol=[PPME1], gene=[protein phosphatase methylesterase 1], gb=[NM_016147], gi=[7706644]			13	19	PPME1	0.686341	-0.543003	1.96849	0.977092
17657	0.0804	0.08	0.024	0.146	0.355	0.453	0.243	0.578	0.0163	0.364	0.587	0.276	0.201	0.335	1.8123	0.0069606	0.0306673	0.00488596	Induced	1		gene symbol=[GLRX], gene=[glutaredoxin (thioltransferase)], gb=[NM_002064], gi=[4504024]			13	18	GLRX	0.689189	-0.537028	1.8123	0.857821
41961	0.2	-0.569	-0.165	0	0.097	0.0611	0.387	0.221	0.0909	-0.232	-0.0825	-0.312	-0.134	-0.278	1.30422	0.230938	0.0482586	0.319678	Induced	1		gene symbol=[TTL], gene=[tubulin tyrosine ligase], gb=[NM_153712], gi=[109715847]			13	17	TTL	0.696353	-0.52211	1.30422	0.383184
42487	-0.225	-0.00836	-0.155	-0.0761	0.143	0.389	0.126	0.273	0.229	0.218	0.258	0.0957	-0.0552	0.0729	1.95459	0.000645906	0.000688871	0.00867833	Induced	1		gene symbol=[MAFF], gene=[v-maf musculoaponeurotic fibrosarcoma oncogene homolog F (avian)], gb=[NM_012323], gi=[23111001]			13	18	MAFF	0.707942	-0.498297	1.95459	0.966864
11407	-0.15	-0.547	-0.25	-0.152	0.0812	0.0896	0.128	0.0669	-0.0604	0.118	0.26	-0.0912	-0.587	-0.168	1.81326	0.0376909	0.00366279	0.178345	Induced	1		gene symbol=[CTNNBL1], gene=[catenin, beta like 1], gb=[NM_030877], gi=[29570786]			13	21	CTNNBL1	0.71969	-0.474552	1.81326	0.858586
19792	-0.0294	-0.272	0.0104	-0.248	0.193	0.199	0.198	-0.061	0.0745	-0.52	-0.077	0.0687	-0.245	-0.203	1.25161	0.229714	0.0106403	0.325588	Induced	1		gene symbol=[MPHOSPH6], gene=[M-phase phosphoprotein 6], gb=[BC029395], gi=[20810435]			13	22	MPHOSPH6	0.722653	-0.468625	1.25161	0.323788
39993	0.0498	0.705	0.175	-0.156	0.355	0.134	0.53	0.389	0.212	-0.495	0.334	-0.248	-0.198	-0.0541	0.798804	0.318617	0.245289	0.094282	Repressed	-1		gene symbol=[OTUD5], gene=[OTU domain containing 5], gb=[NM_017602], gi=[40353201]			13	19	OTUD5	0.731602	-0.45087	0.798804	-0.324087
30100	-0.0281	0.0563	0.11	0.115	0.0204	-0.292	-0.251	-0.353	-0.258	-0.239	-0.354	-0.0586	-0.259	-0.0269	0.536525	0.00137392	0.00387916	0.00677761	Repressed	-1		gene symbol=[GDPD5], gene=[glycerophosphodiester phosphodiesterase domain containing 5], gb=[NM_030792], gi=[142372831]			13	19	GDPD5	0.736111	-0.442005	0.536525	-0.898283
20858	-0.0142	-0.0727	-0.11	-0.0914	0.137	0.222	0.133	0.188	0.228	0.101	0.435	0.0156	0.138	-0.0694	1.6784	0.00374148	2.73221e-05	0.0437341	Induced	1		gene symbol=[SMNDC1], gene=[survival motor neuron domain containing 1], gb=[NM_005871], gi=[21361283]			13	20	SMNDC1	0.745201	-0.424299	1.6784	0.747085
11783	0.00978	0.277	0.176	0.229	0.154	0.194	0.336	0.241	0.259	-0.171	0.00197	-0.108	-0.00776	-0.224	0.784469	0.16989	0.168364	0.00322393	Repressed	-1		gene symbol=[CTSZ], gene=[cathepsin Z], gb=[NM_001336], gi=[22538441]			13	18	CTSZ	0.751313	-0.412513	0.784469	-0.350211
1247	0.135	0.422	0.0357	0	0.0338	-0.184	-0.12	-0.0513	-0.122	0.189	0.789	0.0522	0.0881	0.0931	0.848428	0.323821	0.0198767	0.306825	Repressed	-1		gene symbol=[C21orf30], gene=[chromosome 21 open reading frame 30], gb=[AL117578], gi=[5912133]			13	22	C21orf30	0.754386	-0.406625	0.848428	-0.237136
22780	-0.339	-0.158	0.302	0	-0.398	-0.403	-0.323	-0.268	-0.116	-0.118	-0.0674	0.136	0.269	0.102	0.851354	0.318089	0.0500312	0.22839	Repressed	-1		gene symbol=[LOC202051], gene=[hypothetical protein LOC202051], gb=[BC040037], gi=[25141592]			13	23	LOC202051	0.79051	-0.339144	0.851354	-0.23217
29426	-0.245	-0.182	0.345	0.163	0.14	-0.332	-0.322	-0.302	-0.221	0.204	0.147	0	0.256	0.359	0.938966	0.433186	0.0982364	0.129412	Repressed	-1		gene symbol=[RBBP4], gene=[retinoblastoma binding protein 4], gb=[NM_005610], gi=[5032026]			13	19	RBBP4	0.792115	-0.336219	0.938966	-0.0908547
24179	-0.0684	-0.12	-0.445	-0.284	-0.451	-0.471	-0.467	-0.513	-0.369	-0.122	-0.17	-0.17	-0.132	-0.235	0.83052	0.208052	0.0127897	0.221714	Repressed	-1		gene symbol=[COL4A3], gene=[collagen, type IV, alpha 3 (Goodpasture antigen)], gb=[NM_000091], gi=[89142729]			13	20	COL4A3	0.793447	-0.333794	0.83052	-0.267914
8645	0.291	-0.186	0.29	0.227	0.425	0.471	0.346	0.158	0.485	0.165	0.0204	0.0646	0.0402	-0.028	1.14609	0.31862	0.0556251	0.184122	Induced	1		gene symbol=[YWHAG], gene=[tyrosine 3-monooxygenase/tryptophan 5-monooxygenase activation protein, gamma polypeptide], gb=[NM_012479], gi=[21464100]			13	19	YWHAG	0.793722	-0.333294	1.14609	0.196725
34709	-0.0243	-0.133	-0.0646	-0.282	0.164	0.298	0.165	0.279	0.036	0.119	0.159	0.0499	0.0537	0.0589	1.83749	0.000357447	0.00177993	0.0031267	Induced	1		gene symbol=[HIGD1A], gene=[HIG1 domain family, member 1A], gb=[NM_014056], gi=[153085462]			13	20	HIGD1A	0.801802	-0.318682	1.83749	0.877736
9105	-0.161	-0.0171	-0.308	-0.107	0.058	0.163	0.182	0.376	0.171	-0.165	0.0532	-0.136	-0.117	-0.0346	1.59711	0.0271005	0.00185691	0.180388	Induced	1		gene symbol=[BFAR], gene=[bifunctional apoptosis regulator], gb=[NM_016561], gi=[7706090]			13	18	BFAR	0.806685	-0.309923	1.59711	0.675464
31660	-0.00727	-0.0683	0.00453	0.0219	0.267	0.346	0.169	0.246	0.191	0.089	0.226	0.129	0.34	0.0546	1.65213	0.000606471	0.000163704	0.0108065	Induced	1		gene symbol=[TPBG], gene=[trophoblast glycoprotein], gb=[NM_006670], gi=[34222307]			13	18	TPBG	0.809955	-0.304087	1.65213	0.72433
19533	-0.0718	-0.371	0.221	0	0.043	0.0781	-0.145	0.0617	0.29	0.353	0.619	0.519	0	0.319	1.85879	0.0437564	0.196399	0.0178806	Induced	1		gene symbol=[HDAC4], gene=[histone deacetylase 4], gb=[NM_006037], gi=[153085394]			13	19	HDAC4	0.813237	-0.298253	1.85879	0.894363
22954	-0.146	-0.0809	-0.102	-0.111	0.0358	0.159	0.155	0.237	-0.0233	0.0856	0.0981	0.0457	0.0787	0.0451	1.59091	0.000122243	0.00230157	7.3223e-06	Induced	1		gene symbol=[UCHL3], gene=[ubiquitin carboxyl-terminal esterase L3 (ubiquitin thiolesterase)], gb=[NM_006002], gi=[37059734]			13	19	UCHL3	0.814882	-0.295337	1.59091	0.66985
34930	0.0696	-0.306	-0.156	-0.108	0.293	0.0497	0.378	0.309	0.21	0.0897	-0.115	0.249	0.171	0.245	2.05608	0.00188734	0.00259494	0.0212549	Induced	1		gene symbol=[TPM1], gene=[tropomyosin 1 (alpha)], gb=[AK092594], gi=[21751223]			13	18	TPM1	0.814882	-0.295337	2.05608	1.0399
15633	-0.127	-0.23	0.0108	-0.227	-0.108	-0.0379	0.117	0.0376	-0.072	0.0118	0.301	0.218	0.34	0.158	1.7372	0.00852099	0.0473175	0.00193211	Induced	1		gene symbol=[VPS37A], gene=[vacuolar protein sorting 37 homolog A (S. cerevisiae)], gb=[AL834189], gi=[21739687]			13	20	VPS37A	0.818182	-0.289507	1.7372	0.796764
21926	0.201	0.0677	0.138	0.0919	-0.00473	-0.428	-0.166	-0.306	-0.0474	-0.196	-0.0388	-0.0501	-0.0925	-0.0557	0.545541	0.00169245	0.00592832	0.000715022	Repressed	-1		gene symbol=[CCDC84], gene=[coiled-coil domain containing 84], gb=[NM_198489], gi=[38348291]			13	20	CCDC84	0.819836	-0.286592	0.545541	-0.874242
28083	0.0367	0.0319	0.0953	0.0667	-0.0834	-0.433	-0.149	-0.334	-0.259	-0.295	-0.131	-0.158	-0.356	-0.0512	0.521663	0.000545883	0.00182274	0.00269475	Repressed	-1		gene symbol=[PILRB], gene=[paired immunoglobin-like type 2 receptor beta], gb=[NM_013440], gi=[30179914]			13	19	PILRB	0.833181	-0.263299	0.521663	-0.93881
38291	0	-0.33	0	0.159	0.2	0.189	0.244	0.076	0.241	-0.0709	0.44	-0.288	-0.267	-0.176	1.26346	0.241563	0.0235003	0.435709	Induced	1		gene symbol=[SLC19A3], gene=[solute carrier family 19, member 3], gb=[NM_025243], gi=[93352566]			13	21	SLC19A3	0.833181	-0.263299	1.26346	0.337375
13290	-0.119	-0.204	0	0	0.0265	-0.394	-0.102	0	-0.193	0.365	0.136	0.354	0	0.472	1.40346	0.159775	0.304584	0.00710661	Induced	1		gene symbol=[FBXO36], gene=[F-box protein 36], gb=[NM_174899], gi=[111185921]			13	20	FBXO36	0.838235	-0.254573	1.40346	0.488988
21340	0.0069	0.122	-0.0104	-0.296	0.223	0.187	0.00164	0.328	0.0245	-0.15	0.483	-0.291	-0.457	-0.242	1.13524	0.369471	0.0509693	0.337569	Induced	1		gene symbol=[FBXO36], gene=[F-box protein 36], gb=[BC022538], gi=[18490703]			13	20	FBXO36	0.838235	-0.254573	1.13524	0.183002
19826	-0.0734	0.259	-0.171	-0.171	0.0104	-0.133	0.0216	-0.0902	0	-0.392	0.0504	-0.432	-0.457	-0.381	0.72247	0.137662	0.496558	0.0408415	Repressed	-1		gene symbol=[HERC4], gene=[hect domain and RLD 4], gb=[AY650034], gi=[55832182]			13	19	HERC4	0.839926	-0.251665	0.72247	-0.46899
12776	-0.101	-0.179	-0.066	-0.0942	-0.434	-0.51	-0.352	-0.406	-0.385	-0.149	0.269	-0.289	-0.398	-0.399	0.637896	0.0581231	3.60259e-05	0.288991	Repressed	-1		gene symbol=[IQCG], gene=[IQ motif containing G], gb=[NM_032263], gi=[31340578]			13	18	IQCG	0.843318	-0.245851	0.637896	-0.648606
21497	0.043	0.0508	0.246	0.011	-0.224	-0.193	-0.113	-0.0983	-0.12	0.0395	0.194	0.189	0.228	-0.0177	0.795701	0.14863	0.00170182	0.303919	Repressed	-1		gene symbol=[DST], gene=[dystonin], gb=[AK025142], gi=[10437600]			13	17	DST	0.845018	-0.242945	0.795701	-0.329701
33227	-0.298	-0.039	-0.15	-0.43	0.24	0.264	0.249	0.153	0.228	0.0945	0.104	-0.0885	-0.0891	-0.0626	2.18012	0.00126957	0.000319929	0.0220919	Induced	1		gene symbol=[YBX1], gene=[Y box binding protein 1], gb=[NM_004559], gi=[109134359]			13	18	YBX1	0.850139	-0.23423	2.18012	1.12441
21591	0.00702	0.0496	0.0508	0.194	0.862	0.573	0.444	0.369	0.602	0.284	0.506	0.35	0.563	0.156	2.48625	0.00124889	0.000940699	0.00701787	Induced	1		gene symbol=[SH3BP5], gene=[SH3-domain binding protein 5 (BTK-associated)], gb=[NM_004844], gi=[109134335]			13	20	SH3BP5	0.874414	-0.193611	2.48625	1.31397
37156	-0.0395	-0.151	0.0837	0.0908	-0.317	-0.304	-0.2	-0.299	-0.202	-0.109	-0.33	0.12	0.336	0.416	0.822432	0.287615	0.001475	0.299939	Repressed	-1		gene symbol=[FLOT2], gene=[flotillin 2], gb=[NM_004475], gi=[94538361]			13	19	FLOT2	0.874414	-0.193611	0.822432	-0.282032
3459	-0.0744	-0.0964	-0.0338	-0.157	0.11	0.327	0.326	0.25	0.263	0.223	0.236	-0.106	0.00681	-0.104	1.75219	0.00788743	0.000117936	0.0772495	Induced	1		gene symbol=[FGFR1OP2], gene=[FGFR1 oncogene partner 2], gb=[NM_015633], gi=[24308110]			13	22	FGFR1OP2	0.879699	-0.184918	1.75219	0.809159
27708	-0.0245	0.0644	0.15	0.345	-0.159	-0.273	-0.104	-0.228	-0.256	-0.196	-0.0235	-0.0349	-0.275	-0.0126	0.51295	0.00079148	0.00172747	0.0169854	Repressed	-1		gene symbol=[RBBP6], gene=[retinoblastoma binding protein 6], gb=[NM_006910], gi=[38683862]			13	19	RBBP6	0.881468	-0.182021	0.51295	-0.96311
5201	0.0211	-0.0504	0.0229	-0.0325	-0.319	-0.605	-0.247	-0.409	-0.502	-0.343	-0.369	-0.0866	-0.589	-0.155	0.443879	0.000930824	0.000457576	0.0108354	Repressed	-1		gene symbol=[RBBP6], gene=[retinoblastoma binding protein 6], gb=[BC051317], gi=[30411050]			13	19	RBBP6	0.881468	-0.182021	0.443879	-1.17176
32272	0.0336	-0.334	0.0714	0.249	0.443	0.621	0.414	0.452	0.457	0.0984	0.175	0.169	0.0848	0.222	2.03526	0.0118916	0.00228826	0.117204	Induced	1		gene symbol=[C5orf35], gene=[chromosome 5 open reading frame 35], gb=[NM_153706], gi=[31559786]			13	21	C5orf35	0.890359	-0.167541	2.03526	1.02521
40670	0.0869	0.257	0.152	0.137	-0.178	-0.146	0.0254	-0.181	0.0448	-0.079	0.283	-0.224	-0.0921	-0.173	0.588552	0.00758366	0.00350997	0.0406429	Repressed	-1		gene symbol=[BCAN], gene=[brevican], gb=[BC005081], gi=[13477230]			13	18	BCAN	0.892377	-0.164275	0.588552	-0.764758
32349	0.106	-0.239	-0.125	-0.488	0.258	0.306	0.142	0.247	0.322	-0.033	-0.0275	0.217	0.435	0.307	2.53425	0.00127403	0.00308388	0.0227874	Induced	1		gene symbol=[AARSD1], gene=[alanyl-tRNA synthetase domain containing 1], gb=[NM_025267], gi=[34147388]			13	20	AARSD1	0.913876	-0.12993	2.53425	1.34156
31852	-0.0487	-0.115	-0.0805	-0.147	0.189	0.224	0.159	0.213	0.0689	0.0101	0.247	-0.0237	0.111	0.0041	1.65211	0.000713823	7.93978e-05	0.0130133	Induced	1		gene symbol=[FAM18B], gene=[family with sequence similarity 18, member B], gb=[NM_016078], gi=[148747573]			13	20	FAM18B	0.919386	-0.121258	1.65211	0.724313
2466	-0.172	-0.224	-0.271	-0.212	0.0893	0.306	0.173	0.311	-0.121	0.163	0.298	-0.16	-0.0905	-0.0347	2.05665	0.00324113	0.00253467	0.0176334	Induced	1		gene symbol=[RPN2], gene=[ribophorin II], gb=[NM_002951], gi=[35493915]			13	18	RPN2	0.919386	-0.121258	2.05665	1.0403
15359	0.133	0.169	0.198	0.0885	-0.114	-0.231	0.0382	-0.189	-0.0102	-0.0804	-0.232	-0.00557	-0.219	-0.00969	0.559254	0.000364057	0.00250592	0.0017814	Repressed	-1		gene symbol=[D2HGDH], gene=[D-2-hydroxyglutarate dehydrogenase], gb=[NM_152783], gi=[119964727]			13	20	D2HGDH	0.923077	-0.115477	0.559254	-0.838425
21458	-0.0961	0.0438	-0.0735	-0.00662	0.367	0.32	0.395	0.424	0.256	0.155	0.368	0.22	0.298	0.255	2.18225	5.87893e-06	2.43082e-05	0.000294837	Induced	1		gene symbol=[HEXB], gene=[hexosaminidase B (beta polypeptide)], gb=[NM_000521], gi=[13128866]			13	18	HEXB	0.92864	-0.106808	2.18225	1.12582
42603	0.0753	0.279	-0.172	-0.0783	-0.109	-0.326	0.204	0	0	-0.556	0.204	-0.429	-0.334	-0.387	0.631975	0.104426	0.298892	0.0499605	Repressed	-1		gene symbol=[LOC148189], gene=[hypothetical protein LOC148189], gb=[AK022299], gi=[10433664]			13	23	LOC148189	0.92864	-0.106808	0.631975	-0.66206
1074	0	0	0	-0.252	-0.515	-0.555	-0.476	-0.801	-0.532	0	-0.348	-0.325	-0.0262	-0.356	0.467283	0.0128772	0.000276331	0.105068	Repressed	-1		gene symbol=[CYSLTR1], gene=[cysteinyl leukotriene receptor 1], gb=[AK023929], gi=[10436019]			13	21	CYSLTR1	0.936108	-0.0952525	0.467283	-1.09763
4852	-0.112	-0.205	-0.161	-0.232	0.112	0.165	0.111	0.171	0.141	-0.0323	-0.12	-0.118	-0.258	-0.088	1.53416	0.0179902	3.81798e-06	0.148345	Induced	1		gene symbol=[PDIA3], gene=[protein disulfide isomerase family A, member 3], gb=[NM_005313], gi=[67083697]			13	19	PDIA3	0.937984	-0.092364	1.53416	0.617447
27906	0.14	0.131	0.393	0.27	0.429	-0.031	-0.0391	-0.00593	0.198	0.589	0.112	0.553	0.537	0.326	1.07968	0.404304	0.162483	0.0729321	Induced	1		gene symbol=[CTBP1], gene=[C-terminal binding protein 1], gb=[AL137653], gi=[6807720]			13	19	CTBP1	0.945525	-0.080812	1.07968	0.11061
16989	-0.176	-0.135	-0.147	-0.209	-0.0353	0.129	0.127	0.124	-0.115	0.0818	0.163	-0.0373	-0.123	-0.0946	1.54422	0.00386951	0.00457212	0.0174634	Induced	1		gene symbol=[ERGIC2], gene=[ERGIC and golgi 2], gb=[NM_016570], gi=[50959175]			13	20	ERGIC2	0.95122	-0.0721498	1.54422	0.626881
33615	-0.266	-0.0324	0.029	-0.0164	0.653	0.482	0.421	0.13	0.585	-0.0289	-0.322	0.0923	-0.113	0.0614	1.85153	0.0709375	0.00146855	0.464648	Induced	1		gene symbol=[TPM4], gene=[tropomyosin 4], gb=[NM_003290], gi=[4507650]			13	18	TPM4	0.95122	-0.0721498	1.85153	0.888715
24221	-0.0762	-0.0469	0.0107	-0.0839	0.114	0.0672	0.00695	0.0942	-0.00928	0.0236	0.16	0.231	0.293	0.261	1.49019	0.0051388	0.00837059	0.00195683	Induced	1		gene symbol=[DBF4], gene=[DBF4 homolog (S. cerevisiae)], gb=[NM_006716], gi=[41393589]			13	18	DBF4	0.958864	-0.0606021	1.49019	0.575497
40225	0.221	0.227	0.262	0.222	0.219	0.431	0.164	0.438	0.353	-0.0558	0.155	0.0157	-0.083	-0.014	0.849748	0.248473	0.104629	0.000984086	Repressed	-1		gene symbol=[TPD52L1], gene=[tumor protein D52-like 1], gb=[BM986936], gi=[19706325]			13	21	TPD52L1	0.964637	-0.0519426	0.849748	-0.234894
22731	0.0031	-0.00579	-0.113	0.0741	-0.134	-0.16	0.0107	-0.0503	-0.16	0.0845	0.175	0.118	0.15	0.139	1.06583	0.354599	0.064411	0.0034674	Induced	1		gene symbol=[PPIA], gene=[peptidylprolyl isomerase A (cyclophilin A)], gb=[CR594762], gi=[50475569]			13	18	PPIA	0.964637	-0.0519426	1.06583	0.0919759
35901	-0.256	-0.0912	0.00378	0.0124	-0.707	-0.64	-0.435	-0.614	-0.685	-0.458	-0.575	-0.416	-0.756	-0.441	0.323635	1.341e-05	0.000115802	0.000815179	Repressed	-1		gene symbol=[COASY], gene=[Coenzyme A synthase], gb=[NM_025233], gi=[110227602]			13	19	COASY	0.966568	-0.0490564	0.323635	-1.62756
866	0.0465	-0.00161	0.173	0.0955	0.453	0.516	0.298	0.31	-0.0639	0.177	0.555	0.0563	0.304	0.302	1.63077	0.0298834	0.0503962	0.0418549	Induced	1		gene symbol=[GRHL2], gene=[grainyhead-like 2 (Drosophila)], gb=[CB852269], gi=[30047255]			13	19	GRHL2	0.970443	-0.0432841	1.63077	0.705553
40267	-0.171	-0.167	-0.128	0.0191	0.255	-0.0253	0.255	0.241	0.239	-0.336	0.0806	-0.142	-0.586	-0.000686	1.28762	0.236493	0.00213925	0.283812	Induced	1		gene symbol=[SLC35F2], gene=[solute carrier family 35, member F2], gb=[AW029229], gi=[5887985]			13	21	SLC35F2	0.972387	-0.0403981	1.28762	0.364703
9712	-0.0942	0.0409	-0.165	-0.147	0.176	0.431	0.175	0.479	0.137	0.305	0.531	0.171	-0.0651	0.236	2.23314	0.00182592	0.00244639	0.0133444	Induced	1		gene symbol=[TXNDC4], gene=[thioredoxin domain containing 4 (endoplasmic reticulum)], gb=[NM_015051], gi=[52487190]			13	20	TXNDC4	0.974334	-0.0375122	2.23314	1.15907
36398	-0.0162	0.227	0.049	0.0552	0.649	0.739	0.415	0.641	0.315	0.427	0.443	0.43	0.36	0.516	2.59866	8.67034e-05	0.00114488	0.000146053	Induced	1		gene symbol=[PROCR], gene=[protein C receptor, endothelial (EPCR)], gb=[NM_006404], gi=[34335271]			13	19	PROCR	0.976285	-0.0346263	2.59866	1.37777
20737	0.0819	-0.317	-0.244	-0.179	-0.0775	0.369	0.0177	0.317	0.215	0.252	0.418	0.203	0.241	-0.0591	2.26014	0.00240104	0.0155591	0.00712692	Induced	1		gene symbol=[XG], gene=[Xg blood group], gb=[NM_175569], gi=[28212219]			13	16	XG	0.977671	-0.0325784	2.26014	1.17641
10330	0.0207	0.302	0.15	-0.172	0.0527	-0.0401	0.24	0.224	0.183	0.0254	-0.174	-0.201	-0.601	-0.25	0.742549	0.196921	0.306947	0.0332189	Repressed	-1		gene symbol=[MRO], gene=[maestro], gb=[NM_031939], gi=[21362006]			13	17	MRO	0.981818	-0.0264722	0.742549	-0.429442
9765	-0.125	-0.544	-0.0584	-0.283	-0.0963	0.303	0.192	0.229	0.198	0.0792	0.323	-0.157	0.279	-0.119	2.37514	0.00318777	0.00562272	0.0284826	Induced	1		gene symbol=[MIR16], gene=[membrane interacting protein of RGS16], gb=[NM_016641], gi=[39753954]			13	19	MIR16	0.984127	-0.0230836	2.37514	1.24802
14338	0.138	0.155	0.223	0.144	-0.117	-0.214	0.133	-0.416	-0.481	-0.246	0.162	-0.0759	-0.105	-0.196	0.47798	0.00532132	0.0092791	0.00814799	Repressed	-1		gene symbol=[UBE3A], gene=[ubiquitin protein ligase E3A (human papilloma virus E6-associated protein, Angelman syndrome)], gb=[AF037219], gi=[4090971]			13	19	UBE3A	0.984127	-0.0230836	0.47798	-1.06498
28383	-0.118	-0.322	-0.176	-0.224	0.0309	0.0855	0.131	0.135	0.00949	0.102	0.134	0.0582	-0.211	-0.0343	1.79506	0.000591398	0.000258921	0.0142434	Induced	1		gene symbol=[EXT1], gene=[exostoses (multiple) 1], gb=[NM_000127], gi=[46370065]			13	18	EXT1	0.987041	-0.018818	1.79506	0.844032
2647	0.13	0.131	0.213	0.0833	-0.175	-0.315	-0.119	-0.284	-0.101	-0.132	0.0392	-0.135	-0.21	-0.146	0.504539	6.0079e-05	0.00021856	0.000915828	Repressed	-1		gene symbol=[ZBTB20], gene=[zinc finger and BTB domain containing 20], gb=[BC010934], gi=[15012068]			13	20	ZBTB20	0.992032	-0.0115416	0.504539	-0.986961
10078	0.138	0.0145	0.312	0	-0.0319	-0.192	0.0619	-0.16	-0.156	0.257	0.0731	0.151	0.199	0.164	0.832693	0.20657	0.0195068	0.244279	Repressed	-1		gene symbol=[BRDT], gene=[bromodomain, testis-specific], gb=[NM_207189], gi=[46399199]			13	18	BRDT	0.992032	-0.0115416	0.832693	-0.264143
12808	0.0951	-0.0722	0.072	0.125	-0.348	-0.315	-0.426	-0.31	-0.344	-0.0542	-0.0137	0	0.171	-0.12	0.587537	0.0238642	2.20672e-05	0.206093	Repressed	-1		gene symbol=[TBK1], gene=[TANK-binding kinase 1], gb=[BC009864], gi=[33991355]			13	18	TBK1	0.996008	-0.00577079	0.587537	-0.767249
11892	0.339	0.228	0.278	0.143	-0.0715	-0.616	-0.277	-0.42	-0.51	-0.283	-0.305	-0.255	-0.128	-0.0581	0.288828	6.09697e-05	0.000447536	0.000114049	Repressed	-1		gene symbol=[CORO6], gene=[coronin 6], gb=[NM_032854], gi=[109627649]			13	19	CORO6	1	0	0.288828	-1.79172
29316	0.0979	0.247	0.344	0.303	-0.414	-0.417	0.111	-0.27	0.00682	-0.144	-0.0157	-0.206	-0.262	0.0722	0.396421	0.00107406	0.00602286	0.00186495	Repressed	-1		gene symbol=[CFHR1], gene=[complement factor H-related 1], gb=[NM_002113], gi=[118442838]			13	19	CFHR1	1	0	0.396421	-1.33489
19	-0.0331	0.0436	-0.032	-0.0888	0.235	0.252	0.235	0.244	0.169	0.242	0.246	-0.0733	0.0979	0.00348	1.55841	0.0045851	2.62627e-05	0.0642884	Induced	1		gene symbol=[ABHD2], gene=[abhydrolase domain containing 2], gb=[BE671816], gi=[10032446]			13	19	ABHD2	1	0	1.55841	0.640079
25168	0.083	-0.344	-0.135	-0.164	0.423	0.499	0.217	0.396	-0.117	0.255	0.785	-0.207	-0.233	0.2	2.30038	0.0312216	0.0117394	0.111405	Induced	1		gene symbol=[GDPD1], gene=[glycerophosphodiester phosphodiesterase domain containing 1], gb=[NM_182569], gi=[142362000]			13	19	GDPD1	1	0	2.30038	1.20187
41070	-0.169	-0.706	-0.0669	-0.153	0.307	0.15	0.565	0.218	0.281	-0.434	-0.281	-0.262	-0.382	-0.263	1.83495	0.105742	0.00324627	0.358433	Induced	1		gene symbol=[SAFB], gene=[scaffold attachment factor B], gb=[NM_002967], gi=[21264342]			13	18	SAFB	1	0	1.83495	0.875743
40651	0.0944	0.241	-0.0142	-0.0209	0.365	0.0929	0.407	0.459	0.375	-0.187	0.108	-0.0103	-0.244	-0.08	1.13106	0.352384	0.0109546	0.0600565	Induced	1		gene symbol=[KIAA0406], gene=[KIAA0406], gb=[NM_014657], gi=[24307960]			13	22	KIAA0406	1.00602	0.0086562	1.13106	0.177673
24014	-0.0464	0.0208	0.251	0.159	-0.102	-0.281	-0.167	-0.307	-0.28	-0.116	-0.186	-0.00389	-0.0829	-0.133	0.547042	0.000761831	0.00163859	0.0107895	Repressed	-1		gene symbol=[LOC51152], gene=[melanoma antigen], gb=[AF172850], gi=[5802880]			13	22	LOC51152	1.02224	0.0317406	0.547042	-0.870275
9616	0.0649	0.0689	0.0352	0.0831	-0.303	-0.176	-0.101	-0.158	-0.122	0.0816	0.123	0.0953	0.0526	0.0907	0.785769	0.0969881	0.000354831	0.072464	Repressed	-1		gene symbol=[MARCH7], gene=[membrane-associated ring finger (C3HC4) 7], gb=[AK023400], gi=[10435322]			13	20	MARCH7	1.02224	0.0317406	0.785769	-0.347822
8657	-0.458	0.0501	0.076	0.0483	0.0208	0.236	0.195	0.197	0.233	-0.366	-0.134	-0.233	0	-0.327	1.13	0.358134	0.0412837	0.167383	Induced	1		gene symbol=[PPM1A], gene=[protein phosphatase 1A (formerly 2C), magnesium-dependent, alpha isoform], gb=[NM_177951], gi=[29557854]			13	19	PPM1A	1.02429	0.0346263	1.13	0.176328
7278	-0.281	-0.0566	-0.0207	0	-0.371	-0.139	-0.21	-0.28	-0.37	-0.0903	0.462	0.224	-0.126	0.274	1.06401	0.43105	0.0235625	0.0656329	Induced	1		gene symbol=[N4BP3], gene=[Nedd4 binding protein 3], gb=[NM_015111], gi=[62177128]			13	19	N4BP3	1.03046	0.0432841	1.06401	0.0895094
23819	-0.156	-0.206	0.137	0.507	-0.225	-0.331	-0.163	-0.21	-0.132	-0.203	-0.282	0.4	0.377	0.332	0.768776	0.266483	0.0498987	0.407555	Repressed	-1		gene symbol=[ATP10A], gene=[ATPase, Class V, type 10A], gb=[NM_024490], gi=[21361906]			13	20	ATP10A	1.03082	0.0437877	0.768776	-0.379364
31632	0.0411	-0.374	-0.125	-0.102	0.228	0.559	0.245	0.531	0.213	0.184	0.614	0.083	0.0374	-0.256	2.42	0.0110219	0.00187401	0.0835859	Induced	1		gene symbol=[AP4S1], gene=[adaptor-related protein complex 4, sigma 1 subunit], gb=[BC035622], gi=[23958679]			13	19	AP4S1	1.0429	0.0606021	2.42	1.27501
944	-0.0978	0.0612	-0.0867	-0.105	0.339	0.321	0.239	0.24	0.38	0.16	0.421	0.0197	0.283	-0.0886	1.94305	0.00279619	5.9564e-05	0.0434887	Induced	1		gene symbol=[UGP2], gene=[UDP-glucose pyrophosphorylase 2], gb=[NM_006759], gi=[48255965]			13	18	UGP2	1.04499	0.0634888	1.94305	0.958326
27003	0.054	0.148	0.000993	0.164	0	0.0149	-0.0334	-0.059	0.16	0.736	0.568	0.261	0	0.383	1.29212	0.227932	0.106884	0.0415703	Induced	1		gene symbol=[CXorf57], gene=[chromosome X open reading frame 57], gb=[NM_018015], gi=[142381710]			13	21	CXorf57	1.05128	0.0721498	1.29212	0.369736
33006	-0.336	0.114	-0.223	0.019	0.313	0.205	0.314	0.352	0.0604	-0.132	0.461	-0.0177	-0.212	0.0235	1.75073	0.0437015	0.00711821	0.221252	Induced	1		gene symbol=[AMFR], gene=[autocrine motility factor receptor], gb=[NM_001144], gi=[85815824]			13	18	AMFR	1.0555	0.0779245	1.75073	0.807959
3814	-0.0487	0.0401	0.176	-0.0364	-0.191	-0.215	-0.226	-0.21	-0.149	-0.281	0.0136	0.0571	0.0236	0.276	0.753494	0.110192	0.000956562	0.448246	Repressed	-1		gene symbol=[ZNF131], gene=[zinc finger protein 131], gb=[BX339253], gi=[46269384]			13	20	ZNF131	1.05761	0.080812	0.753494	-0.408331
38490	0.219	0.532	0.224	-0.112	0.794	0.782	0.518	0.915	0.226	-0.0417	0.478	0.0694	0.0162	0.34	1.56293	0.167526	0.0246358	0.398511	Induced	1		gene symbol=[NT5E], gene=[5'-nucleotidase, ecto (CD73)], gb=[NM_002526], gi=[4505466]			13	18	NT5E	1.06961	0.0970873	1.56293	0.644255
42175	-0.322	-0.07	-0.1	-0.0136	0.259	0.403	0.18	0.401	0.00114	0.195	0.603	0.055	0.0274	0.0239	2.19404	0.00480439	0.00430701	0.0308208	Induced	1		gene symbol=[CRIM1], gene=[cysteine rich transmembrane BMP regulator 1 (chordin-like)], gb=[NM_016441], gi=[10092638]			13	19	CRIM1	1.07039	0.0981411	2.19404	1.13359
33359	-0.14	-0.0744	-0.156	-0.0198	0.0454	0.361	0.243	0.256	0.267	0.0162	-0.11	-0.075	-0.161	-0.0931	1.48765	0.0535879	0.000676457	0.38555	Induced	1		gene symbol=[LDLR], gene=[low density lipoprotein receptor (familial hypercholesterolemia)], gb=[NM_000527], gi=[8051613]			13	18	LDLR	1.07039	0.0981411	1.48765	0.573033
37481	-0.0363	-0.259	-0.161	0.353	0.672	0.468	0.579	0.394	1.04	0.32	0.388	0.264	0.875	0.283	3.582	0.00200562	0.00347442	0.0182477	Induced	1		gene symbol=[HK2], gene=[hexokinase 2], gb=[NM_000189], gi=[40806188]			13	17	HK2	1.07469	0.103919	3.582	1.84076
38708	0.121	-0.0945	0	-0.226	0.292	-0.0829	0.41	0.155	0.104	-0.7	-0.289	-0.351	-0.282	0	0.945116	0.446232	0.0453038	0.0474695	Repressed	-1		gene symbol=[PRKAR2A], gene=[protein kinase, cAMP-dependent, regulatory, type II, alpha], gb=[AI720033], gi=[5037289]			13	21	PRKAR2A	1.07684	0.106808	0.945116	-0.0814371
40638	0.16	-0.402	-0.168	-0.144	0.462	0.236	0.396	0.469	0.29	-0.402	0.406	-0.102	-0.453	-0.0882	1.8192	0.102728	0.0014689	0.479578	Induced	1		gene symbol=[FAM91A1], gene=[family with sequence similarity 91, member A1], gb=[NM_144963], gi=[84000431]			13	21	FAM91A1	1.08117	0.112587	1.8192	0.863303
7111	0.0112	0.34	0.136	-0.27	0.371	0.282	0.123	0.27	0.342	-0.0362	0.561	-0.0821	-0.0922	-0.344	1.21661	0.301636	0.0551525	0.401064	Induced	1		gene symbol=[CCDC138], gene=[coiled-coil domain containing 138], gb=[AK023150], gi=[10434942]			13	21	CCDC138	1.08117	0.112587	1.21661	0.282862
33442	-0.371	-0.147	-0.148	-0.131	0.195	0.17	0.187	0.164	0.505	0.092	0.0658	-0.0389	-0.31	0.0367	2.0226	0.00864607	0.000834026	0.0631664	Induced	1		gene symbol=[HSP90AA1], gene=[heat shock protein 90kDa alpha (cytosolic), class A member 1], gb=[NM_005348], gi=[154146190]			13	22	HSP90AA1	1.08551	0.118367	2.0226	1.01621
24048	-0.067	-0.166	0.362	0.217	-0.365	-0.251	-0.09	-0.22	-0.22	0.103	0.0332	0.291	0	0.482	0.775925	0.242869	0.016176	0.270825	Repressed	-1		gene symbol=[APOOL], gene=[apolipoprotein O-like], gb=[BQ286694], gi=[20656455]			13	19	APOOL	1.08986	0.124148	0.775925	-0.36601
43973	-0.0101	0.0843	-0.0687	-0.0121	0.425	0.37	0.24	0.356	0.25	0.312	0.598	0.234	0.229	0.165	2.08713	0.000236196	0.000140381	0.00568571	Induced	1		gene symbol=[LRRC1], gene=[leucine rich repeat containing 1], gb=[NM_018214], gi=[95113663]			13	19	LRRC1	1.09205	0.127039	2.08713	1.06152
22830	-0.255	-0.316	-0.101	-0.122	0.27	0.416	0.209	0.214	-0.122	0.253	0.11	0.11	0.000713	0.139	2.28282	0.000483877	0.00435393	0.000805951	Induced	1		gene symbol=[PDLIM2], gene=[PDZ and LIM domain 2 (mystique)], gb=[NM_021630], gi=[40288188]			13	20	PDLIM2	1.09644	0.132822	2.28282	1.19082
2281	0.198	0.188	0.053	0.166	-0.0983	-0.0586	-0.159	-0.192	-0.287	-0.122	0.153	-0.0758	-0.336	-0.197	0.514612	0.00087998	0.000334884	0.013477	Repressed	-1		gene symbol=[KCNMB4], gene=[potassium large conductance calcium-activated channel, subfamily M, beta member 4], gb=[NM_014505], gi=[26051274]			13	20	KCNMB4	1.10305	0.141497	0.514612	-0.958443
6307	-0.227	-0.445	-0.0752	-0.241	-0.0187	0.322	0.22	0.232	0.0273	0.347	0.601	0.0927	0.0513	0.228	2.86622	0.000472215	0.00240346	0.00290492	Induced	1		gene symbol=[C21orf25], gene=[chromosome 21 open reading frame 25], gb=[NM_199050], gi=[119226225]			13	22	C21orf25	1.10526	0.14439	2.86622	1.51915
31364	-0.173	-0.169	0.602	0	-0.165	-0.102	0.0311	-0.0238	-0.122	0.343	0.194	0.372	0.248	0.537	1.16474	0.347279	0.21141	0.0803004	Induced	1		gene symbol=[CCDC117], gene=[coiled-coil domain containing 117], gb=[NM_173510], gi=[27735132]			13	21	CCDC117	1.12314	0.167541	1.16474	0.220011
2977	0.101	0.13	0.0942	0.0571	-0.138	-0.302	-0.117	-0.236	-0.121	-0.211	-0.179	-0.146	-0.104	-0.0895	0.549636	4.79194e-06	0.000192546	3.42753e-05	Repressed	-1		gene symbol=[ENO3], gene=[enolase 3 (beta, muscle)], gb=[NM_001976], gi=[153267426]			13	18	ENO3	1.1254	0.170436	0.549636	-0.863452
27264	-0.144	-0.195	0.15	0.363	-0.258	-0.173	-0.0932	-0.22	-0.218	0.296	-0.231	0.316	0.288	0.325	0.911339	0.400302	0.0442416	0.192559	Repressed	-1		gene symbol=[C14orf174], gene=[chromosome 14 open reading frame 174], gb=[NM_001010860], gi=[58082088]			13	23	C14orf174	1.14362	0.193611	0.911339	-0.13394
6744	0.0199	-0.0241	0.0671	0.05	-0.227	-0.242	-0.264	-0.274	-0.0457	-0.165	-0.176	-0.205	-0.142	-0.139	0.607862	4.43849e-05	0.00110167	2.67201e-05	Repressed	-1		gene symbol=[C11orf65], gene=[chromosome 11 open reading frame 65], gb=[NM_152587], gi=[115298675]			13	22	C11orf65	1.16083	0.215159	0.607862	-0.718184
25428	-0.125	-0.218	-0.257	-0.0361	0.484	0.173	0.226	-0.022	0.484	0.104	0.133	0.0519	0.184	-0.0405	2.17153	0.00248378	0.00425829	0.00260035	Induced	1		gene symbol=[BHLHB2], gene=[basic helix-loop-helix domain containing, class B, 2], gb=[NM_003670], gi=[4503298]			13	20	BHLHB2	1.16685	0.222616	2.17153	1.11871
17927	0.113	-0.223	-0.0994	-0.146	0.427	0.265	0.21	0.445	0.217	0.119	0.377	0.175	0.374	-0.2	2.13673	0.00467764	0.00113288	0.0495089	Induced	1		gene symbol=[WDR89], gene=[WD repeat domain 89], gb=[NM_001008726], gi=[57165358]			13	19	WDR89	1.1692	0.225519	2.13673	1.09541
34161	-0.0474	-0.087	-0.191	-0.017	0.258	0.474	0.113	0.414	-0.286	0.184	0.257	0.123	-0.118	0.163	1.75307	0.0308275	0.0590814	0.0175925	Induced	1		gene symbol=[FDX1], gene=[ferredoxin 1], gb=[NM_004109], gi=[36054077]			13	18	FDX1	1.1692	0.225519	1.75307	0.809886
19573	0.263	-0.0983	-0.299	-0.0516	0.595	0.914	0.494	0.72	0.296	0.461	1.31	0.36	-0.344	0.429	3.71514	0.0146755	0.00210296	0.0818396	Induced	1		gene symbol=[ACTR3B], gene=[ARP3 actin-related protein 3 homolog B (yeast)], gb=[NM_020445], gi=[92373412]			13	20	ACTR3B	1.18341	0.242945	3.71514	1.89342
42786	-0.103	-0.646	-0.316	-0.157	-0.0174	0.138	0.17	0.344	0.16	-0.203	0.453	-0.187	-0.0985	-0.188	2.30468	0.0115393	0.00382507	0.0936748	Induced	1		gene symbol=[LONRF1], gene=[LON peptidase N-terminal domain and ring finger 1], gb=[NM_152271], gi=[87080812]			13	20	LONRF1	1.18381	0.243439	2.30468	1.20456
12985	-0.267	0.0378	-0.103	0.0669	0.936	1.06	0.547	0.82	0.795	0.703	0.809	0.445	0.576	0.48	6.0733	8.08495e-06	6.18657e-05	0.000163123	Induced	1		gene symbol=[FLT1], gene=[fms-related tyrosine kinase 1 (vascular endothelial growth factor/vascular permeability factor receptor)], gb=[NM_002019], gi=[156104875]			13	18	FLT1	1.18579	0.245851	6.0733	2.60248
14496	-0.117	-0.0796	-0.105	0.00359	0.214	0.395	0.148	0.421	0.0757	0.165	0.387	0.0912	0.177	0.0512	1.93648	0.00100613	0.00249069	0.00465142	Induced	1		gene symbol=[CD164], gene=[CD164 molecule, sialomucin], gb=[NM_006016], gi=[34222157]			13	19	CD164	1.18579	0.245851	1.93648	0.953435
3487	0.0817	-0.078	0	-0.239	0.283	0.126	0.337	0.206	0	0.299	-0.0458	-0.436	-0.0996	-0.176	1.28288	0.215847	0.014028	0.414808	Induced	1		gene symbol=[SSBP1], gene=[single-stranded DNA binding protein 1], gb=[BC008402], gi=[14250011]			13	19	SSBP1	1.18818	0.248758	1.28288	0.359383
41507	-0.0799	0.123	0	-0.0761	0.189	0.244	0.188	0.208	0.125	-0.459	0.362	-0.108	-0.248	-0.148	1.10548	0.377776	0.00195199	0.251621	Induced	1		gene symbol=[FLJ32549], gene=[hypothetical protein FLJ32549], gb=[BC036246], gi=[23958530]			13	22	FLJ32549	1.18818	0.248758	1.10548	0.14467
13308	-0.0164	0.104	-0.0484	0.0434	0.338	0.399	0.247	0.434	0.185	0.268	0.357	0.162	0.265	0.065	1.78382	0.000776916	0.000811974	0.00796341	Induced	1		gene symbol=[YIPF4], gene=[Yip1 domain family, member 4], gb=[NM_032312], gi=[34147412]			13	19	YIPF4	1.19058	0.251665	1.78382	0.834967
24548	-0.341	-0.443	-0.449	-0.506	-0.535	0.104	0.102	-0.00842	-0.228	-0.0828	-0.236	-0.193	-0.517	-0.0442	1.86598	0.0199734	0.0283302	0.030919	Induced	1		gene symbol=[CKMT1B], gene=[creatine kinase, mitochondrial 1B], gb=[NM_020990], gi=[66346731]			13	20	CKMT1B	1.1978	0.26039	1.86598	0.899937
965	0.145	0.0404	0.0957	0.31	0.082	-0.453	-0.373	-0.567	-0.501	-0.366	-0.162	-0.144	-0.548	-0.0452	0.350352	0.00133583	0.00420504	0.00497917	Repressed	-1		gene symbol=[MC1R], gene=[melanocortin 1 receptor (alpha melanocyte stimulating hormone receptor)], gb=[NM_002386], gi=[27477128]			13	18	MC1R	1.20264	0.266209	0.350352	-1.51312
36410	-0.167	-0.0903	-0.233	-0.306	-0.0674	0.163	0.0525	0.162	0.183	0.134	0.259	-0.107	-0.113	-0.034	1.8293	0.00208101	0.00153202	0.0216387	Induced	1		gene symbol=[HSPA5], gene=[heat shock 70kDa protein 5 (glucose-regulated protein, 78kDa)], gb=[NM_005347], gi=[21361242]			13	19	HSPA5	1.20264	0.266209	1.8293	0.871292
32515	-0.0199	-0.00779	-0.0532	-0.0856	0.214	0.187	0.232	0.231	0.156	0.157	0.307	0.0728	0.0171	-0.0539	1.56179	0.00272012	6.02328e-06	0.0453006	Induced	1		gene symbol=[RAB6A], gene=[RAB6A, member RAS oncogene family], gb=[NM_002869], gi=[38679893]			13	19	RAB6A	1.20994	0.274941	1.56179	0.6432
40755	-0.241	-0.295	-0.00998	0.158	0.578	0.639	0.358	0.468	0.328	0.277	0.638	0.167	0.42	0.00203	3.05139	0.000966356	0.000808697	0.0180855	Induced	1		gene symbol=[KLF5], gene=[Kruppel-like factor 5 (intestinal)], gb=[NM_001730], gi=[52630441]			13	18	KLF5	1.21239	0.277853	3.05139	1.60947
10792	0.394	0.219	0.168	-0.116	0.468	0.0847	0.363	0.336	0.268	-0.0133	-0.253	-0.0832	0.576	-0.0142	1.01613	0.482004	0.139978	0.26167	Induced	1		gene symbol=[SOX4], gene=[SRY (sex determining region Y)-box 4], gb=[AW946823], gi=[8124596]			13	18	SOX4	1.25225	0.324525	1.01613	0.0230874
42353	0.156	0.0304	-0.0309	0.0672	0.435	0.314	0.244	0.381	0.383	0.345	0.579	0.458	0.223	0.215	2.00459	0.000232038	0.000324282	0.00453042	Induced	1		gene symbol=[KIF2A], gene=[kinesin heavy chain member 2A], gb=[NM_004520], gi=[148612876]			13	19	KIF2A	1.25479	0.327448	2.00459	1.00331
39472	-0.274	-0.206	-0.0359	0	0.236	0.341	0.224	0.136	0.241	-0.0114	-0.244	0	0	0.104	1.70465	0.0163827	0.000558414	0.147379	Induced	1		gene symbol=[IPO7], gene=[importin 7], gb=[NM_006391], gi=[5453997]			13	18	IPO7	1.27015	0.344996	1.70465	0.769475
14557	-0.0755	-0.241	-0.122	-0.0482	-0.618	-0.422	-0.354	-0.432	-0.233	-0.105	-0.127	0.192	0.0128	0.0132	0.82106	0.26184	0.00427492	0.0770416	Repressed	-1		gene symbol=[CBX2], gene=[chromobox homolog 2 (Pc class homolog, Drosophila)], gb=[NM_032647], gi=[32306516]			13	18	CBX2	1.2779	0.35378	0.82106	-0.28444
32291	-0.318	-0.239	-0.178	-0.305	-0.158	0.0268	0.181	0.105	0.196	-0.153	0.318	-0.212	-0.218	-0.366	1.706	0.0346246	0.00200145	0.177474	Induced	1		gene symbol=[KIAA1217], gene=[KIAA1217], gb=[NM_019590], gi=[148612880]			13	22	KIAA1217	1.28833	0.365502	1.706	0.770621
39793	0.0648	0.118	-0.0859	0.0553	0.272	0.0663	0.221	0.167	0.207	-0.109	-0.00609	-0.16	-0.157	-0.116	1.00109	0.497969	0.014935	0.0103225	Induced	1		gene symbol=[POLR3A], gene=[polymerase (RNA) III (DNA directed) polypeptide A, 155kDa], gb=[NM_007055], gi=[39725937]			13	20	POLR3A	1.29621	0.374301	1.00109	0.00156463
34753	0.138	0.0907	0.0246	0.092	0.588	0.385	0.327	0.318	0.0621	0.0948	0.176	0.00453	0.483	0.0267	1.44607	0.0766888	0.0187463	0.252389	Induced	1		gene symbol=[RHOU], gene=[ras homolog gene family, member U], gb=[NM_021205], gi=[45827773]			13	18	RHOU	1.3015	0.380171	1.44607	0.532133
27052	-0.135	-0.0365	0.26	0.363	-0.222	-0.351	-0.186	-0.17	0.385	-0.0695	-0.298	0.421	0.458	0.346	0.828848	0.331572	0.126559	0.388879	Repressed	-1		gene symbol=[WDR31], gene=[WD repeat domain 31], gb=[NM_001012361], gi=[59938779]			13	19	WDR31	1.30681	0.386044	0.828848	-0.27082
27363	-0.144	-0.037	-0.103	-0.157	0.117	0.146	0.199	0.0575	0.229	0.117	0.0672	0.0363	0.0829	0.0356	1.65577	4.08591e-05	0.000215336	0.000255006	Induced	1		gene symbol=[TPI1], gene=[triosephosphate isomerase 1], gb=[NM_000365], gi=[52851446]			13	18	TPI1	1.31481	0.39486	1.65577	0.727502
31220	-0.116	-0.269	-0.104	-0.0547	0.312	0.319	0.198	0.163	0.154	-0.111	0.395	0.193	-0.00161	-0.125	1.93003	0.00558143	0.000195161	0.0642872	Induced	1		gene symbol=[RRP15], gene=[ribosomal RNA processing 15 homolog (S. cerevisiae)], gb=[AB007976], gi=[3413951]			13	19	RRP15	1.3175	0.3978	1.93003	0.948623
31457	-0.268	-0.283	-0.605	0.032	0.626	0.43	0.398	0.272	0.291	0.31	0.506	0.139	0.315	0.126	4.19083	5.52363e-05	0.000722439	0.00248373	Induced	1		gene symbol=[ADFP], gene=[adipose differentiation-related protein], gb=[NM_001122], gi=[34577058]			13	18	ADFP	1.32019	0.400741	4.19083	2.06724
25804	-0.045	-0.0897	-0.111	-0.119	0.215	0.295	0.201	0.18	0.211	0.132	0.328	0.0138	0.0285	0.00392	1.78648	0.000576488	3.72303e-06	0.0149688	Induced	1		gene symbol=[HRB], gene=[HIV-1 Rev binding protein], gb=[NM_004504], gi=[38570131]			13	17	HRB	1.32558	0.406625	1.78648	0.837116
37694	0	0.201	0.0538	0	0.399	0.172	0.481	0.406	0.511	0.0725	0.341	0.182	-0.253	0.306	1.57779	0.0635267	0.00211126	0.311132	Induced	1		gene symbol=[DDHD1], gene=[DDHD domain containing 1], gb=[NM_030637], gi=[45120112]			13	19	DDHD1	1.33645	0.418404	1.57779	0.657908
22464	0.0188	-0.075	-0.0271	-0.0394	0.413	0.33	0.2	0.325	0.159	0.135	0.16	0.101	0.489	0.0345	1.84215	0.00224786	0.000362687	0.0255615	Induced	1		gene symbol=[FAM3C], gene=[family with sequence similarity 3, member C], gb=[NM_014888], gi=[91807123]			13	19	FAM3C	1.34467	0.427248	1.84215	0.881391
37875	-0.0116	-0.101	-0.103	-0.211	0.187	0.227	0.208	0.248	0.0777	0.0597	0.459	-0.0456	0.392	-0.124	1.88595	0.00713017	0.000265549	0.0534435	Induced	1		gene symbol=[FAM3C], gene=[family with sequence similarity 3, member C], gb=[NM_014888], gi=[91807123]			13	19	FAM3C	1.34467	0.427248	1.88595	0.915291
25681	-0.102	0.0218	-0.0833	-0.0905	0.374	0.303	0.0607	0.211	0.158	0.148	0.425	0.18	0.431	0.164	2.0369	0.000347148	0.00188972	0.00181869	Induced	1		gene symbol=[VIL2], gene=[villin 2 (ezrin)], gb=[NM_003379], gi=[21614498]			13	18	VIL2	1.34742	0.430197	2.0369	1.02638
27695	0.0267	0.0478	-0.0221	0.0522	0.428	0.433	0.236	0.337	0.252	0.191	0.0489	0.211	0.285	0.161	1.70663	0.00134734	0.000209912	0.00637954	Induced	1		gene symbol=[VIL2], gene=[villin 2 (ezrin)], gb=[AA873311], gi=[2969433]			13	18	VIL2	1.34742	0.430197	1.70663	0.771152
22724	-0.07	-0.00327	0.0341	-0.00361	0.511	0.549	0.327	0.39	0.326	0.25	0.131	0.182	-0.0647	0.166	1.93832	0.00541006	5.86178e-05	0.0284959	Induced	1		gene symbol=[VIL2], gene=[villin 2 (ezrin)], gb=[NM_003379], gi=[21614498]			13	18	VIL2	1.34742	0.430197	1.93832	0.954805
32054	-0.161	-0.123	-0.148	-0.0355	0.272	0.23	0.245	0.231	-0.0745	0.205	0.461	0.0597	-0.0956	-0.000951	1.86269	0.00608593	0.00307926	0.0341507	Induced	1		gene symbol=[CHMP2B], gene=[chromatin modifying protein 2B], gb=[NM_014043], gi=[40254865]			13	20	CHMP2B	1.35571	0.439051	1.86269	0.897385
6437	-0.253	-0.244	0.205	0	-0.291	-0.197	-0.406	-0.34	-0.229	0	-0.0813	0.0344	0	-0.0825	0.819898	0.208747	0.0377587	0.325889	Repressed	-1		gene symbol=[CAMK2D], gene=[calcium/calmodulin-dependent protein kinase (CaM kinase) II delta], gb=[AA687964], gi=[2674870]			13	20	CAMK2D	1.35571	0.439051	0.819898	-0.286483
14879	0.5	0.165	0.172	0.0023	0.491	0.461	0.26	0.53	0.693	0.162	0.251	0.232	0.204	0.0895	1.3413	0.148166	0.0277644	0.413303	Induced	1		gene symbol=[TUBA4A], gene=[tubulin, alpha 4a], gb=[NM_006000], gi=[17921988]			13	20	TUBA4A	1.36407	0.447914	1.3413	0.423629
18171	-0.452	-0.337	-0.398	-0.153	0.104	0.136	0.215	0.216	0.338	-0.211	0.395	-0.0748	0	-0.257	2.63706	0.00203608	7.98522e-05	0.0351151	Induced	1		gene symbol=[LYSMD3], gene=[LysM, putative peptidoglycan-binding, domain containing 3], gb=[NM_198273], gi=[84370275]			13	20	LYSMD3	1.37248	0.456784	2.63706	1.39893
43677	0.114	-0.0222	-0.0552	0.0984	0.352	0.239	0.263	0.357	0.343	-0.0865	0.37	0.00393	-0.0381	-0.162	1.35015	0.130717	0.000291248	0.443834	Induced	1		gene symbol=[ZDHHC20], gene=[zinc finger, DHHC-type containing 20], gb=[NM_153251], gi=[49457850]			13	21	ZDHHC20	1.38095	0.465664	1.35015	0.433123
13106	-0.458	-0.371	0.124	0	-0.424	-0.484	-0.43	-0.279	-0.43	-0.319	-0.0978	0	0	0.0821	0.867122	0.330591	0.0577823	0.240046	Repressed	-1		gene symbol=[KIAA1586], gene=[KIAA1586], gb=[NM_020931], gi=[55741652]			13	22	KIAA1586	1.39234	0.477516	0.867122	-0.205694
18034	0.0269	0.0244	0.359	0.0953	-0.062	-0.0384	-0.00566	-0.0516	0.151	0.264	0.34	0.276	0	0.454	1.01469	0.477032	0.0830066	0.120606	Induced	1		gene symbol=[ANGEL2], gene=[angel homolog 2 (Drosophila)], gb=[NM_144567], gi=[70794817]			13	20	ANGEL2	1.40385	0.489385	1.01469	0.0210411
11494	-0.14	0.0372	-0.11	-0.145	0.067	0.15	0.165	0.186	0.324	0.0964	0.308	0.0118	0.0775	-0.0488	1.67163	0.00275783	0.00151423	0.0282838	Induced	1		gene symbol=[CACYBP], gene=[calcyclin binding protein], gb=[NM_014412], gi=[55925645]			13	20	CACYBP	1.40674	0.492355	1.67163	0.741255
8487	-0.14	-0.04	-0.0321	-0.0487	0.268	0.379	0.216	0.423	0.076	0.137	0.42	0.099	0.236	0.0195	1.96133	0.00116782	0.00122715	0.00930049	Induced	1		gene symbol=[LYPLA1], gene=[lysophospholipase I], gb=[NM_006330], gi=[20302148]			13	20	LYPLA1	1.40964	0.495325	1.96133	0.97183
22631	-0.077	-0.204	-0.0487	-0.126	0.13	0.445	0.182	0.239	0.219	0.0744	0.202	-0.0251	-0.237	-0.00378	1.72376	0.015356	0.000589908	0.111389	Induced	1		gene symbol=[SNAPC3], gene=[small nuclear RNA activating complex, polypeptide 3, 50kDa], gb=[NM_001039697], gi=[89242151]			13	20	SNAPC3	1.43902	0.525091	1.72376	0.78556
26728	-0.114	-0.051	-0.155	0.0536	0.224	0.631	0.449	0.562	0.113	0.338	0.899	0.187	-0.634	0.277	2.35072	0.0512387	0.00299515	0.17656	Induced	1		gene symbol=[PKIB], gene=[protein kinase (cAMP-dependent, catalytic) inhibitor beta], gb=[NM_181795], gi=[32483391]			13	18	PKIB	1.442	0.528074	2.35072	1.2331
33852	-0.122	-0.516	-0.0396	-0.534	0.00936	0.145	-0.0366	-0.0544	0.186	0.106	0.193	0.08	0.0206	0.118	2.3966	0.000546561	0.0134268	0.00538329	Induced	1		gene symbol=[NIN], gene=[ninein (GSK3B interacting protein)], gb=[NM_016350], gi=[33946312]			13	17	NIN	1.457	0.543003	2.3966	1.26099
39576	-0.0616	0.161	0.221	0.118	0.421	0.269	0.393	0.196	0.502	0.00286	-0.0313	-0.0298	-0.179	0.0523	1.12203	0.346041	0.00985141	0.0357637	Induced	1		gene symbol=[RALB], gene=[v-ral simian leukemia viral oncogene homolog B (ras related; GTP binding protein)], gb=[NM_002881], gi=[48762927]			13	18	RALB	1.46002	0.545993	1.12203	0.166116
15231	-0.104	-0.351	-0.0904	0.137	-0.173	-0.241	0.0191	-0.341	-0.106	0.159	0.0198	0.0658	0.411	0.317	1.30368	0.206596	0.285463	0.0223098	Induced	1		gene symbol=[OTUD4], gene=[OTU domain containing 4], gb=[NM_199324], gi=[156630989]			13	19	OTUD4	1.46609	0.551975	1.30368	0.382586
2690	-0.134	0.145	-0.169	-0.11	0.194	0.204	0.16	0.204	-0.00129	0.0118	-0.107	-0.199	-0.147	-0.159	1.21074	0.197424	0.0124675	0.251406	Induced	1		gene symbol=[OTUD3], gene=[OTU domain containing 3], gb=[AB007928], gi=[58257653]			13	19	OTUD3	1.46914	0.554968	1.21074	0.275889
7106	-0.0156	-0.0418	-0.106	0.00726	0.222	0.309	0.123	0.343	0.0733	0.239	0.424	0.215	0.184	0.0534	1.80969	0.000675076	0.00246036	0.00384231	Induced	1		gene symbol=[CCDC47], gene=[coiled-coil domain containing 47], gb=[NM_020198], gi=[9910241]			13	20	CCDC47	1.47219	0.557962	1.80969	0.855745
33439	-0.171	-0.0911	-0.0871	-0.218	0.224	0.0651	0.308	0.111	0.604	0.203	0.0525	0.0509	0.416	-0.00351	2.21258	0.0024725	0.00427408	0.00816391	Induced	1		gene symbol=[LDHA], gene=[lactate dehydrogenase A], gb=[NM_005566], gi=[5031856]			13	18	LDHA	1.49066	0.575951	2.21258	1.14573
33445	-0.16	-0.0562	-0.00232	0.117	0.471	0.458	0.312	0.558	0.258	0.104	0.432	0.149	0.518	0.0729	2.28386	0.00163225	0.000486257	0.0227516	Induced	1		gene symbol=[PIK3CB], gene=[phosphoinositide-3-kinase, catalytic, beta polypeptide], gb=[NM_006219], gi=[5453893]			13	20	PIK3CB	1.49688	0.581958	2.28386	1.19148
10495	-0.0417	0.0165	-0.043	-0.147	-0.0903	0.0543	-0.0397	-0.00983	-0.189	0.342	0.298	0.24	-0.159	0.224	1.32083	0.129379	0.49228	0.0276999	Induced	1		gene symbol=[C14orf94], gene=[chromosome 14 open reading frame 94], gb=[NM_017815], gi=[8923395]			13	22	C14orf94	1.53807	0.621122	1.32083	0.401445
7089	-0.216	0.0256	0.138	-0.0517	-0.36	-0.386	-0.294	-0.33	-0.432	-0.266	-0.366	-0.402	-0.408	-0.149	0.486099	0.000136307	0.00105485	0.00574108	Repressed	-1		gene symbol=[C8orf70], gene=[chromosome 8 open reading frame 70], gb=[NM_016010], gi=[7705774]			13	21	C8orf70	1.54453	0.627167	0.486099	-1.04068
34064	0.0895	0.1	0.119	0.0579	-0.161	-0.322	-0.0843	-0.299	-0.144	-0.268	-0.169	-0.241	-0.345	-0.00486	0.506505	0.000112066	0.000462952	0.00141804	Repressed	-1		gene symbol=[CTDSP1], gene=[CTD (carboxy-terminal domain, RNA polymerase II, polypeptide A) small phosphatase 1], gb=[NM_021198], gi=[10864008]			13	20	CTDSP1	1.54777	0.630192	0.506505	-0.981351
35516	0.0748	0.165	0.135	0.247	0.339	0.0749	0.44	0.334	0.0612	-0.0348	-0.0884	0.0514	-0.045	-0.134	0.879792	0.302706	0.170521	0.00164055	Repressed	-1		gene symbol=[INADL], gene=[InaD-like (Drosophila)], gb=[NM_176877], gi=[112382256]			13	19	INADL	1.55428	0.636245	0.879792	-0.184766
6298	-0.0467	-0.0235	0.0658	-0.0559	0.218	0.314	0.246	0.257	0.19	0.274	0.476	0.191	0.171	0.099	1.81416	0.000237467	6.01458e-05	0.00634161	Induced	1		gene symbol=[FAM120A], gene=[family with sequence similarity 120A], gb=[NM_014612], gi=[68299753]			13	21	FAM120A	1.5641	0.645335	1.81416	0.8593
36766	0.0733	-0.471	-0.378	-0.12	0.941	0.327	0.405	0.293	0.335	-0.259	0.902	-0.172	-0.106	0.103	3.16829	0.0221327	0.00296272	0.13288	Induced	1		gene symbol=[TOR1AIP1], gene=[torsin A interacting protein 1], gb=[NM_015602], gi=[39753956]			13	22	TOR1AIP1	1.5641	0.645335	3.16829	1.6637
3447	-0.0708	0.0709	-0.152	-0.151	0.164	0.17	0.334	0.252	0.274	0.331	0.692	-0.172	-0.143	-0.313	1.71643	0.0778953	0.000533488	0.250262	Induced	1		gene symbol=[SMCHD1], gene=[structural maintenance of chromosomes flexible hinge domain containing 1], gb=[AB014550], gi=[3327113]			13	20	SMCHD1	1.5641	0.645335	1.71643	0.779407
32323	0.00641	-0.101	0.0537	0.159	0.181	0.155	0.134	0.194	0.189	-0.147	-0.126	0.00733	-0.294	-0.139	0.968067	0.443557	0.0119385	0.0254827	Repressed	-1		gene symbol=[RBJ], gene=[rab and DnaJ domain containing], gb=[NM_016544], gi=[23821014]			13	17	RBJ	1.56739	0.648368	0.968067	-0.0468209
7325	-0.0363	0.207	0.0567	-0.0191	0.201	0.415	0.288	0.348	0.312	0.178	0.417	0.153	0.103	0.02	1.55391	0.0134779	0.00217485	0.10778	Induced	1		gene symbol=[HNRPH2], gene=[heterogeneous nuclear ribonucleoprotein H2 (H')], gb=[NM_019597], gi=[74099695]			13	20	HNRPH2	1.61097	0.687926	1.55391	0.6359
23729	-0.045	0.0808	0.167	-0.0542	0.092	0.156	0.254	0.145	0.156	-0.0696	0.0634	-0.0742	-0.0555	-0.0471	1.05889	0.360246	0.030384	0.110417	Induced	1		gene symbol=[TMEM16F], gene=[transmembrane protein 16F], gb=[NM_001025356], gi=[70778894]			13	21	TMEM16F	1.61097	0.687926	1.05889	0.0825499
35109	-0.0219	-0.00873	0.00976	-0.0398	0.241	0.351	0.15	0.236	0.199	0.0025	0.439	-0.137	-0.0853	-0.115	1.39087	0.0959882	0.000171799	0.388132	Induced	1		gene symbol=[GLUL], gene=[glutamate-ammonia ligase (glutamine synthetase)], gb=[NM_002065], gi=[74271838]			13	18	GLUL	1.63158	0.706269	1.39087	0.475991
21101	0.00409	0.203	-0.0583	0.108	0.0112	-0.0376	0.0419	-0.0232	0.0161	-0.341	-0.0138	-0.145	-0.347	-0.383	0.651122	0.0346704	0.138817	0.0070559	Repressed	-1		gene symbol=[ALS2], gene=[amyotrophic lateral sclerosis 2 (juvenile)], gb=[NM_020919], gi=[40316934]			13	18	ALS2	1.6455	0.718528	0.651122	-0.619
12219	0.00583	0.0613	0.0624	0.0848	-0.109	-0.222	-0.0769	-0.114	0.0129	0.196	0.391	0.14	0.054	0.187	0.982466	0.468537	0.00545027	0.0333133	Repressed	-1		gene symbol=[SHPRH], gene=[SNF2 histone linker PHD RING helicase], gb=[NM_173082], gi=[111548663]			13	19	SHPRH	1.64901	0.721597	0.982466	-0.0255207
24408	-0.224	-0.0713	-0.0201	0.226	0.689	0.335	0.223	0.209	0.269	-0.152	-0.44	-0.129	-0.112	0.135	1.33367	0.240763	0.0127257	0.202099	Induced	1		gene symbol=[NOTCH2NL], gene=[Notch homolog 2 (Drosophila) N-terminal like], gb=[NM_203458], gi=[131889436]			13	22	NOTCH2NL	1.66312	0.733889	1.33367	0.415407
34927	-0.138	-0.0863	-0.123	-0.449	0.114	0.2	0.128	0.241	0.155	0.0429	0.332	0.0533	0.11	-0.0431	2.14974	0.00036543	0.00113841	0.0115183	Induced	1		gene symbol=[C15orf15], gene=[chromosome 15 open reading frame 15], gb=[NM_016304], gi=[18491027]			13	22	C15orf15	1.67023	0.740044	2.14974	1.10416
26181	-0.327	-0.256	-0.0835	-0.0881	0.121	0.431	0.244	0.453	0.0393	0.332	0.216	0.0335	-0.126	0.0896	2.355	0.00168193	0.00213761	0.011994	Induced	1		gene symbol=[HSP90B1], gene=[heat shock protein 90kDa beta (Grp94), member 1], gb=[NM_003299], gi=[4507676]			13	21	HSP90B1	1.6738	0.743124	2.355	1.23572
35793	-0.121	-0.386	-0.0774	0.107	0.295	0.287	0.144	0.288	0.143	-0.0412	-0.361	0.223	0.274	0.137	1.8123	0.0269092	0.00452937	0.164742	Induced	1		gene symbol=[MYST3], gene=[MYST histone acetyltransferase (monocytic leukemia) 3], gb=[AK027361], gi=[14041986]			13	19	MYST3	1.69542	0.761641	1.8123	0.857821
38310	0.00128	-0.328	-0.0282	0	0.305	0.192	0.294	0.351	0.347	-0.0745	0.0198	0.0285	-0.225	0.118	1.67614	0.0333562	0.00079302	0.27008	Induced	1		gene symbol=[SNF1LK2], gene=[SNF1-like kinase 2], gb=[NM_015191], gi=[38569459]			13	21	SNF1LK2	1.71739	0.780219	1.67614	0.745142
40777	-0.414	-0.211	-0.129	-0.22	0.18	0.141	0.0371	0.433	0.0147	0.0519	0.028	0.145	0.2	0.402	2.55135	0.000211294	0.00243517	0.00154145	Induced	1		gene symbol=[TLK1], gene=[tousled-like kinase 1], gb=[NM_012290], gi=[33636697]			13	18	TLK1	1.72851	0.789531	2.55135	1.35126
40974	-0.215	-0.0911	-0.0842	-0.236	0.297	0.18	0.271	0.178	0.278	-0.053	0.37	0.0104	0.159	0.0941	2.16284	0.000278951	2.62836e-05	0.00952925	Induced	1		gene symbol=[C1orf21], gene=[chromosome 1 open reading frame 21], gb=[NM_030806], gi=[58761542]			13	21	C1orf21	1.74725	0.805088	2.16284	1.11293
33998	0.126	0.0239	-0.00387	-0.00749	0.282	0.274	0.189	0.259	0.346	0.172	-0.629	0.107	0.196	-0.00339	1.21514	0.285251	0.000284933	0.359156	Induced	1		gene symbol=[NPTN], gene=[neuroplastin], gb=[BM982926], gi=[19606924]			13	18	NPTN	1.78164	0.833207	1.21514	0.281121
28746	0.34	-0.231	0.165	0	-0.0453	-0.00562	-0.16	-0.187	-0.177	0.828	0.0102	0.518	0.156	0.57	1.20845	0.342811	0.0771281	0.0616213	Induced	1		gene symbol=[ZNF514], gene=[zinc finger protein 514], gb=[NM_032788], gi=[14249455]			13	20	ZNF514	1.7933	0.842614	1.20845	0.273156
13740	-0.268	0.0146	0.0168	0.00164	0.297	0.336	0.321	0.219	0.251	-0.106	-0.398	-0.0652	0.219	-0.0134	1.46144	0.115217	0.000631235	0.457985	Induced	1		gene symbol=[CKAP4], gene=[cytoskeleton-associated protein 4], gb=[NM_006825], gi=[19920316]			13	19	CKAP4	1.7972	0.845753	1.46144	0.547387
20131	-0.051	0.113	-0.0358	0.00299	0.349	0.251	0.252	0.114	0.27	0.138	0.286	0.231	0.239	0.0476	1.62354	0.000727254	0.00147705	0.00854445	Induced	1		gene symbol=[TRIM24], gene=[tripartite motif-containing 24], gb=[NM_015905], gi=[47419910]			13	20	TRIM24	1.81294	0.858331	1.62354	0.699141
32414	-0.15	0.0304	-0.0981	-0.155	0.0839	0.177	0.091	0.198	0.187	0.0212	0.312	0.0167	0.174	-0.0665	1.63157	0.00258834	0.000697263	0.0336095	Induced	1		gene symbol=[CAPZA2], gene=[capping protein (actin filament) muscle Z-line, alpha 2], gb=[NM_006136], gi=[41327721]			13	20	CAPZA2	1.8169	0.86148	1.63157	0.706259
39226	-0.146	-0.203	-0.18	-0.642	0.296	0.181	0.102	0.228	0.0384	-0.176	-0.642	0.242	0.17	0.246	2.29768	0.0224358	0.00253843	0.136919	Induced	1		gene symbol=[LOC729358///LOC440416///LOC339260], gene=[hypothetical protein LOC729358///hypothetical gene supported by BC072410///hypothetical protein LOC339260], gb=[BC041488], gi=[34193166]			13	47	LOC729358///LOC440416///LOC339260	1.82087	0.864631	2.29768	1.20018
670	-0.163	-0.128	-0.103	-0.225	-0.241	0.047	0.0932	0.285	0.171	0.326	1.03	-0.302	-0.0511	-0.408	1.7773	0.129622	0.0314724	0.193107	Induced	1		gene symbol=[FANCI], gene=[Fanconi anemia, complementation group I], gb=[NM_018193], gi=[82830439]			13	19	FANCI	1.83688	0.877257	1.7773	0.829685
17409	-0.0626	-0.0613	-0.0428	-0.00581	0.33	0.263	0.163	0.209	0.179	0.141	0.511	0.18	0.0524	0.0999	1.80284	0.00126686	7.15077e-05	0.0182024	Induced	1		gene symbol=[INSIG1], gene=[insulin induced gene 1], gb=[AW993939], gi=[8254130]			13	20	INSIG1	1.849	0.886747	1.80284	0.850272
8551	0.0357	0.115	-0.0982	-0.0403	0.131	0.13	0.0702	0.274	0.16	0.328	0.566	0.653	0.318	0.52	2.05102	0.00675925	0.0154968	0.000435716	Induced	1		gene symbol=[PPP4R2], gene=[protein phosphatase 4, regulatory subunit 2], gb=[NM_174907], gi=[141802574]			13	20	PPP4R2	1.85307	0.889915	2.05102	1.03634
1080	-0.00528	-0.308	-0.137	-0.188	0.134	0.105	0.0941	0.16	0.15	0.127	0.524	-0.235	-0.0482	-0.124	1.77117	0.0220683	0.000728212	0.117228	Induced	1		gene symbol=[SRPK2], gene=[SFRS protein kinase 2], gb=[NM_182691], gi=[33188446]			13	19	SRPK2	1.86533	0.899431	1.77117	0.824702
33776	0.265	0.0869	0.0995	0.209	1.01	0.604	0.537	0.585	0.434	0.327	0.216	0.224	0.902	0.109	2.13649	0.0263786	0.00267757	0.141984	Induced	1		gene symbol=[CST6], gene=[cystatin E/M], gb=[NM_001323], gi=[20302137]			13	18	CST6	1.86944	0.902607	2.13649	1.09524
28863	0.0219	0.118	-0.0834	0.00664	0.344	0.365	0.189	0.325	0.172	0.12	0.487	0.0695	0.162	0.0794	1.6425	0.00739619	0.00143282	0.0606001	Induced	1		gene symbol=[ATP6V1C1], gene=[ATPase, H+ transporting, lysosomal 42kDa, V1 subunit C1], gb=[NM_001695], gi=[148536833]			13	22	ATP6V1C1	1.87356	0.905785	1.6425	0.715892
30075	0.0266	0.0283	-0.0172	0.0908	0.413	0.529	0.204	0.451	0.183	0.281	0.391	0.167	0.205	0.2	1.86327	0.000998828	0.00254183	0.00162881	Induced	1		gene symbol=[LMAN1], gene=[lectin, mannose-binding, 1], gb=[NM_005570], gi=[10862689]			13	19	LMAN1	1.8777	0.908965	1.86327	0.897834
33394	0.189	0.116	0.0643	0	0.414	0.247	0.323	0.4	0.431	0.0593	0.602	-0.0944	-0.0815	0.0273	1.3818	0.142948	0.000657437	0.473763	Induced	1		gene symbol=[BAG4], gene=[BCL2-associated athanogene 4], gb=[NM_004874], gi=[14574569]			13	18	BAG4	1.88184	0.912147	1.3818	0.466548
17698	0.292	-0.153	0.3	-0.0497	0.0608	0.577	0.114	-0.022	-0.00679	-0.00659	0.6	0.341	0.379	0.447	1.41585	0.158375	0.389517	0.0697074	Induced	1		gene symbol=[NCKAP1], gene=[NCK-associated protein 1], gb=[AI358607], gi=[4110228]			13	20	NCKAP1	1.89436	0.921707	1.41585	0.501668
24945	-0.012	-0.0115	-0.0824	0.044	0.363	0.367	0.337	0.222	0.138	0.309	0.388	0.297	0.141	0.152	1.93586	8.10406e-05	0.000530074	0.00119626	Induced	1		gene symbol=[LIMCH1], gene=[LIM and calponin homology domains 1], gb=[NM_014988], gi=[55741670]			13	20	LIMCH1	1.89855	0.924899	1.93586	0.952978
28397	-0.144	0.146	-0.11	-0.0876	0.146	0.214	0.165	0.227	0.23	-0.0451	0.499	-0.203	-0.163	-0.219	1.36141	0.154492	0.00255687	0.446776	Induced	1		gene symbol=[UFM1], gene=[ubiquitin-fold modifier 1], gb=[NM_016617], gi=[7705299]			13	18	UFM1	1.92826	0.947298	1.36141	0.445105
22201	0.146	0.225	0.088	0.114	0.779	0.694	0.302	0.69	0.58	0.468	0.72	0.215	0.486	0.192	2.34072	0.00322483	0.00101919	0.023732	Induced	1		gene symbol=[IL1RAP], gene=[interleukin 1 receptor accessory protein], gb=[NM_134470], gi=[24430221]			13	20	IL1RAP	1.93686	0.953718	2.34072	1.22695
26052	-0.16	0.00676	-0.102	-0.111	0.0641	0.34	0.22	0.302	0.221	0.185	0.468	0.0856	0.152	-0.0405	1.9556	0.00144515	0.000643365	0.0173246	Induced	1		gene symbol=[QKI], gene=[quaking homolog, KH domain RNA binding (mouse)], gb=[NM_206855], gi=[45827711]			13	17	QKI	1.98507	0.989193	1.9556	0.967611
40219	-0.109	0.233	-0.276	-0.0518	0.523	0.255	0.446	0.389	0.224	-0.434	0.443	-0.079	-0.271	0	1.5869	0.143848	0.00381963	0.465531	Induced	1		gene symbol=[ETNK1], gene=[ethanolamine kinase 1], gb=[NM_018638], gi=[87298841]			13	19	ETNK1	1.98507	0.989193	1.5869	0.666213
36788	-0.0771	-0.355	-0.184	-0.29	-0.0922	0.119	0.0812	0.16	0.103	0.0407	0.265	-0.0122	-0.0825	-0.162	1.85577	0.00204548	0.00221111	0.0233019	Induced	1		gene symbol=[KRAS], gene=[v-Ki-ras2 Kirsten rat sarcoma viral oncogene homolog], gb=[NM_033360], gi=[34485724]			13	18	KRAS	2.01205	1.00866	1.85577	0.892021
32927	-0.104	-0.0618	-0.065	-0.0533	0.284	0.241	0.179	0.287	0.501	0.221	0.48	0.214	0.461	-0.026	2.26582	0.000534798	0.000292069	0.00739965	Induced	1		gene symbol=[BACH1], gene=[BTB and CNC homology 1, basic leucine zipper transcription factor 1], gb=[NM_206866], gi=[45827689]			13	19	BACH1	2.02115	1.01517	2.26582	1.18003
41325	0.0417	0.0603	-0.0787	-0.108	0.275	-0.0603	0.191	0.273	0.27	-0.0975	-0.0983	-0.0914	0.0308	-0.00601	1.22971	0.164035	0.0184492	0.26846	Induced	1		gene symbol=[CUL3], gene=[cullin 3], gb=[NM_003590], gi=[45827792]			13	18	CUL3	2.0349	1.02496	1.22971	0.298322
35202	-0.103	0.022	0.0188	-0.194	-0.158	-0.351	-0.127	-0.183	0.0498	-0.331	0.193	0.265	0.109	0.122	1.05422	0.42318	0.165143	0.160433	Induced	1		gene symbol=[ZNF251], gene=[zinc finger protein 251], gb=[AK027286], gi=[14041866]			13	20	ZNF251	2.0349	1.02496	1.05422	0.0761718
33960	-0.101	0.000141	-0.0368	-0.0645	0.339	0.191	0.136	0.198	0.261	0.218	0.37	0.243	0.352	0.0115	1.91642	0.000171725	0.000198816	0.00312156	Induced	1		gene symbol=[SWAP70], gene=[SWAP-70 protein], gb=[NM_015055], gi=[93102363]			13	20	SWAP70	2.06748	1.04788	1.91642	0.938411
23198	-0.114	-0.0476	0.000608	-0.107	0.166	0.249	0.0789	0.221	0.204	0.129	0.344	0.134	0.224	0.0378	1.76104	0.000133184	0.000240773	0.00334262	Induced	1		gene symbol=[PARD6B], gene=[par-6 partitioning defective 6 homolog beta (C. elegans)], gb=[NM_032521], gi=[82659099]			13	20	PARD6B	2.0722	1.05116	1.76104	0.816424
17859	-0.0153	-0.0728	-0.0777	0.0864	0.344	0.456	0.208	0.517	-0.0901	0.437	0.56	0.242	-0.25	0.259	1.94151	0.0279301	0.0231365	0.0681154	Induced	1		gene symbol=[PSG3], gene=[pregnancy specific beta-1-glycoprotein 3], gb=[NM_021016], gi=[109240545]			13	18	PSG3	2.10078	1.07092	1.94151	0.95718
18894	-0.116	-0.013	0.0178	0.0444	0.662	0.713	0.389	0.514	0.431	0.418	0.436	0.154	0.448	0.326	2.92281	6.26466e-05	9.28044e-05	0.000523122	Induced	1		gene symbol=[CCNT1], gene=[cyclin T1], gb=[NM_001240], gi=[17978465]			13	19	CCNT1	2.15457	1.1074	2.92281	1.54735
25553	-0.102	-0.0349	-0.0293	-0.0175	0.212	0.3	0.267	0.346	0.239	0.0707	0.378	0.0968	0.289	0.0419	1.86194	0.000419143	9.65981e-06	0.0122246	Induced	1		gene symbol=[IQGAP1], gene=[IQ motif containing GTPase activating protein 1], gb=[NM_003870], gi=[57242794]			13	20	IQGAP1	2.16957	1.11741	1.86194	0.896804
15375	-0.0966	0.0177	-0.0441	-0.0999	0.21	0.217	0.158	0.186	0.132	0.166	0.115	0.0586	0.141	0.00308	1.56456	0.000123559	5.30786e-05	0.00384619	Induced	1		gene symbol=[VAPA], gene=[VAMP (vesicle-associated membrane protein)-associated protein A, 33kDa], gb=[NM_003574], gi=[94721249]			13	18	VAPA	2.18979	1.13079	1.56456	0.64576
34259	0.0673	0.163	0.0144	0.0238	0.373	0.401	0.225	0.355	0.213	0.181	0.605	0.393	-0.117	0.36	1.7052	0.0189935	0.00125068	0.0826257	Induced	1		gene symbol=[LGALS8], gene=[lectin, galactoside-binding, soluble, 8 (galectin 8)], gb=[NM_006499], gi=[42544184]			13	20	LGALS8	2.21027	1.14422	1.7052	0.76994
36779	-0.107	-0.172	-0.176	-0.0484	0.263	0.627	0.207	0.243	0.109	0.294	0.106	0.108	0.186	0.0681	2.22311	0.000749661	0.00256318	0.00058178	Induced	1		gene symbol=[ENG], gene=[endoglin (Osler-Rendu-Weber syndrome 1)], gb=[NM_000118], gi=[4557554]			13	17	ENG	2.22581	1.15433	2.22311	1.15258
83	-0.206	0.0842	-0.183	-0.0494	0.0695	0.498	0.161	0.39	-0.323	0.36	0.289	0.0288	-0.243	0.191	1.7009	0.0657942	0.0970851	0.0792655	Induced	1		gene symbol=[LNPEP], gene=[leucyl/cystinyl aminopeptidase], gb=[AK023633], gi=[10435617]			13	19	LNPEP	2.25733	1.17462	1.7009	0.766302
18784	-0.161	-0.0864	-0.19	0.118	0.319	0.295	0.192	0.109	0.28	0.186	0.231	0.0143	0.115	0.21	1.88356	0.000493313	0.00193526	0.00922013	Induced	1		gene symbol=[SLC16A3], gene=[solute carrier family 16, member 3 (monocarboxylic acid transporter 4)], gb=[NM_004207], gi=[109288008]			13	21	SLC16A3	2.26797	1.1814	1.88356	0.913464
24668	-0.294	-0.296	0	0	-0.257	-0.228	-0.165	-0.424	-0.216	-0.0873	-0.0297	0.259	0.235	0.371	1.23965	0.262725	0.129517	0.0246483	Induced	1		gene symbol=[ZNF791], gene=[zinc finger protein 791], gb=[NM_153358], gi=[23503286]			13	20	ZNF791	2.27869	1.1882	1.23965	0.309936
27062	0.0112	-0.00976	0.222	0	0.0745	-0.123	0.0454	-0.0536	-0.00222	0.342	0.054	0.391	0.298	0.298	1.19275	0.227721	0.159658	0.0155739	Induced	1		gene symbol=[ANGPT1], gene=[angiopoietin 1], gb=[BC029406], gi=[20810212]			13	20	ANGPT1	2.28407	1.19161	1.19275	0.254287
31678	-0.169	-0.299	-0.269	-0.179	0.0916	0.108	0.147	0.236	0.11	-0.0578	0.229	-0.045	-0.24	-0.119	1.88356	0.00286989	2.18163e-05	0.043731	Induced	1		gene symbol=[LIN7C], gene=[lin-7 homolog C (C. elegans)], gb=[NM_018362], gi=[40254922]			13	19	LIN7C	2.35008	1.23271	1.88356	0.913464
41934	-0.0594	0.222	-0.136	-0.068	0.276	0.102	0.236	0.235	0.128	-0.335	0.656	-0.133	-0.325	0.0384	1.25369	0.275647	0.0180816	0.483477	Induced	1		gene symbol=[CHD2], gene=[chromodomain helicase DNA binding protein 2], gb=[NM_001271], gi=[118421088]			13	18	CHD2	2.367	1.24306	1.25369	0.32618
16701	-0.00412	0.0479	-0.0689	-0.00708	0.462	0.219	0.262	0.233	0.297	0.253	0.474	0.19	0.446	0.0568	1.98303	0.000585238	0.000408388	0.00767264	Induced	1		gene symbol=[SASH1], gene=[SAM and SH3 domain containing 1], gb=[NM_015278], gi=[45935384]			13	19	SASH1	2.38409	1.25344	1.98303	0.987709
41984	-0.293	0.111	-0.121	-0.0126	0.366	0.106	0.217	0.303	0.251	0.183	-0.0314	-0.143	-0.362	-0.164	1.41729	0.136398	0.00416161	0.4255	Induced	1		gene symbol=[FAM44A], gene=[family with sequence similarity 44, member A], gb=[NM_148894], gi=[87299627]			13	20	FAM44A	2.38983	1.25691	1.41729	0.503139
37218	-0.0425	-0.492	-0.351	-0.51	-0.0689	-0.0405	0.135	0.123	0.407	-0.104	0.435	-0.142	-0.185	-0.126	2.46737	0.00582963	0.00568585	0.0425332	Induced	1		gene symbol=[HMGCS1], gene=[3-hydroxy-3-methylglutaryl-Coenzyme A synthase 1 (soluble)], gb=[NM_002130], gi=[148298763]			13	20	HMGCS1	2.42466	1.27778	2.46737	1.30298
6480	-0.0838	0.141	0.16	-0.121	0.0859	0.0904	0.128	-0.185	0.0074	-0.212	-0.0604	-0.272	-0.265	-0.239	0.765209	0.117426	0.494522	0.0100839	Repressed	-1		gene symbol=[EPO], gene=[erythropoietin], gb=[NM_000799], gi=[62240996]			13	17	EPO	2.43643	1.28477	0.765209	-0.386074
33601	-0.253	-0.31	-0.0892	-0.00243	0.113	0.268	0.29	0.251	0.114	-0.0443	0.343	-0.122	0.1	-0.0484	1.95024	0.00426569	0.000928569	0.0527327	Induced	1		gene symbol=[CSNK1A1], gene=[casein kinase 1, alpha 1], gb=[NM_001025105], gi=[68303574]			13	21	CSNK1A1	2.48432	1.31285	1.95024	0.96365
17911	-0.0496	-0.215	-0.296	0.13	0.266	0.477	0.211	0.303	0.011	0.354	0.2	0.171	-0.33	0.491	2.10402	0.0168155	0.00945627	0.0770582	Induced	1		gene symbol=[CGA], gene=[glycoprotein hormones, alpha polypeptide], gb=[NM_000735], gi=[10800407]			13	17	CGA	2.4965	1.31991	2.10402	1.07315
41067	0.0378	-0.282	0.0741	-0.0664	0.275	0.373	0.261	0.271	-0.223	-0.323	0.445	-0.191	-0.6	-0.101	1.19626	0.341662	0.0570439	0.330394	Induced	1		gene symbol=[KIAA0256], gene=[KIAA0256 gene product], gb=[NM_014701], gi=[60685226]			13	22	KIAA0256	2.4965	1.31991	1.19626	0.258529
2530	-0.0945	-0.00849	-0.215	-0.135	0.234	0.3	0.104	0.281	0.0301	0.0798	0.284	0.0236	0.0809	0.051	1.82007	0.000750519	0.00179308	0.00604174	Induced	1		gene symbol=[CD55], gene=[CD55 molecule, decay accelerating factor for complement (Cromer blood group)], gb=[NM_000574], gi=[40788009]			13	18	CD55	2.50263	1.32344	1.82007	0.863992
39348	-0.155	-0.426	-0.0712	0.237	0.376	0.744	0.224	0.584	-0.237	0.31	0.659	0.161	0.0973	0.124	2.55876	0.0178997	0.0456571	0.0307036	Induced	1		gene symbol=[PVRL3], gene=[poliovirus receptor-related 3], gb=[BC017572], gi=[17068390]			13	19	PVRL3	2.64964	1.40579	2.55876	1.35545
1302	-0.0127	0.057	-0.0107	-0.0861	-0.00799	0.388	0.295	0.307	0.238	0.3	0.711	-0.175	0.135	-0.259	1.60815	0.0923539	0.00764255	0.230798	Induced	1		gene symbol=[PDS5B], gene=[PDS5, regulator of cohesion maintenance, homolog B (S. cerevisiae)], gb=[NM_015032], gi=[7657268]			13	19	PDS5B	2.64964	1.40579	1.60815	0.6854
13783	-0.0512	-0.224	-0.288	0.0843	0.414	0.345	0.247	0.152	0.438	0.287	0.359	0.135	0.18	0.195	2.4827	0.000103176	0.0012617	0.00250834	Induced	1		gene symbol=[ERRFI1], gene=[ERBB receptor feedback inhibitor 1], gb=[NM_018948], gi=[21314673]			13	20	ERRFI1	2.65631	1.40942	2.4827	1.31191
24022	0.0561	-0.149	0.0124	0.365	0.56	0.719	0.307	0.395	0.676	0.259	-0.143	0.377	0.514	0.361	2.14474	0.0182804	0.00479489	0.120433	Induced	1		gene symbol=[ERRFI1], gene=[ERBB receptor feedback inhibitor 1], gb=[AI570240], gi=[4533614]			13	20	ERRFI1	2.65631	1.40942	2.14474	1.1008
12534	-0.284	-0.152	-0.142	0.226	0.775	0.505	0.447	0.256	0.47	0.146	-0.285	0.278	0.183	0.251	2.4581	0.0143271	0.0017972	0.110786	Induced	1		gene symbol=[C1orf96], gene=[chromosome 1 open reading frame 96], gb=[NM_145257], gi=[48675821]			13	21	C1orf96	2.66972	1.41669	2.4581	1.29755
22317	-0.255	-0.0892	-0.0172	-0.0585	0.4	0.256	0.289	0.188	0.349	-0.0203	0.183	0.0286	-0.0558	0.0136	1.85389	0.00536569	0.000169172	0.0388145	Induced	1		gene symbol=[ST13], gene=[suppression of tumorigenicity 13 (colon carcinoma) (Hsp70 interacting protein)], gb=[NM_003932], gi=[21237722]			13	18	ST13	2.68324	1.42398	1.85389	0.890559
41389	-0.392	0.00198	-0.136	-0.142	0.314	0.367	0.261	0.249	0.0917	0.0402	-0.0564	0.0381	-0.203	0.00528	1.89537	0.0106626	0.00103799	0.0901371	Induced	1		gene symbol=[CLIP1], gene=[CAP-GLY domain containing linker protein 1], gb=[NM_002956], gi=[38016917]			13	19	CLIP1	2.69004	1.42763	1.89537	0.922476
15274	-0.0715	-0.0626	3.04e-05	0.0144	0.276	0.551	0.212	0.352	-0.349	0.15	0.147	0.124	-0.294	0.257	1.48771	0.122807	0.103931	0.182093	Induced	1		gene symbol=[MAN1A2], gene=[mannosidase, alpha, class 1A, member 2], gb=[NM_006699], gi=[46852167]			13	20	MAN1A2	2.7594	1.46435	1.48771	0.57309
10118	0.0157	-0.281	0.286	-0.274	0.361	0.423	0.275	0.635	0.139	-0.0119	0.361	0.111	-0.601	-0.126	1.65934	0.140564	0.0124511	0.48228	Induced	1		gene symbol=[SMC2], gene=[structural maintenance of chromosomes 2], gb=[NM_006444], gi=[110347417]			13	18	SMC2	2.78072	1.47546	1.65934	0.730608
17007	0.1	-0.365	-0.0578	-0.0831	0.609	0.865	0.39	0.486	0.179	0.402	0.655	0.181	-0.135	0.0598	2.95566	0.0072895	0.0028597	0.0505037	Induced	1		gene symbol=[ZNF766], gene=[zinc finger protein 766], gb=[NM_001010851], gi=[71143110]			13	20	ZNF766	3.00802	1.58881	2.95566	1.56348
14684	0.164	0.275	0.156	0.149	-0.181	-0.468	-0.13	-0.23	-0.263	-0.346	-0.126	-0.253	-0.276	-0.288	0.361327	1.84077e-06	0.000217056	2.0011e-05	Repressed	-1		gene symbol=[ZNF83], gene=[zinc finger protein 83], gb=[NM_018300], gi=[21361788]			13	19	ZNF83	3.03226	1.60039	0.361327	-1.46862
29145	-0.0706	0.0469	-0.0536	0.0852	0.413	0.24	0.391	0.0808	0.449	0.209	0.283	0.271	0.691	0.149	2.06874	0.00259464	0.00382281	0.0131086	Induced	1		gene symbol=[NRIP1], gene=[nuclear receptor interacting protein 1], gb=[NM_003489], gi=[57232745]			13	19	NRIP1	3.07332	1.6198	2.06874	1.04875
36557	-0.0188	-0.489	-0.3	-0.212	0.177	0.0931	0.232	0.213	-0.18	-0.134	0.151	-0.257	-0.243	0.018	1.82793	0.0207537	0.0101854	0.115602	Induced	1		gene symbol=[PDE4DIP], gene=[phosphodiesterase 4D interacting protein (myomegalin)], gb=[NM_001002811], gi=[50658070]			13	21	PDE4DIP	3.09836	1.63151	1.82793	0.870212
5747	-0.207	0.275	0.0903	0.297	0.0876	0.0729	-0.0555	-0.0409	-0.0271	0.371	0.487	0.434	0.229	0.0633	1.11765	0.353295	0.178483	0.0871897	Induced	1		gene symbol=[RBAK], gene=[RB-associated KRAB zinc finger], gb=[NM_021163], gi=[113204605]			13	18	RBAK	3.11523	1.63934	1.11765	0.160466
29118	0.00132	0.167	-0.11	0.0548	0.533	0.483	0.414	0.398	0.127	0.471	0.639	0.44	0.146	0.156	2.25123	0.00172586	0.00318179	0.0122399	Induced	1		gene symbol=[SPTLC3], gene=[serine palmitoyltransferase, long chain base subunit 3], gb=[AK075271], gi=[22761247]			13	20	SPTLC3	3.14079	1.65113	2.25123	1.17071
2367	-0.214	-0.493	-0.328	-0.269	0.149	0.0533	0.0202	0.551	0.321	0.776	1.66	-0.377	-0.176	-0.339	3.88911	0.043322	0.00153676	0.102576	Induced	1		gene symbol=[SYNCRIP], gene=[synaptotagmin binding, cytoplasmic RNA interacting protein], gb=[BC032643], gi=[21619167]			13	21	SYNCRIP	3.16667	1.66297	3.88911	1.95944
39580	-0.0938	0.0249	-0.0215	0	0.24	0.307	0.408	0.29	0.204	0.0667	0.387	-0.176	-0.219	-0.133	1.44567	0.107742	0.000116338	0.476859	Induced	1		gene symbol=[RC3H2], gene=[ring finger and CCCH-type zinc finger domains 2], gb=[AL833177], gi=[21733804]			13	19	RC3H2	3.21053	1.68281	1.44567	0.531741
31076	-0.0993	0.018	-0.0685	-0.0229	0.302	0.23	0.224	0.33	0.245	0.0929	0.315	0.121	0.395	-0.00342	1.85491	0.000663572	1.60219e-05	0.0171966	Induced	1		gene symbol=[ADAM9], gene=[ADAM metallopeptidase domain 9 (meltrin gamma)], gb=[NM_003816], gi=[54292119]			13	19	ADAM9	3.46429	1.79256	1.85491	0.89135
8078	0.0121	-0.0511	-0.191	-0.218	0.212	0.333	0.226	0.432	0.263	0.159	0.483	-0.0287	0.119	0.108	2.20105	0.000894064	0.00025445	0.0177311	Induced	1		gene symbol=[SAT1], gene=[spermidine/spermine N1-acetyltransferase 1], gb=[NM_002970], gi=[4506788]			13	18	SAT1	3.662	1.87263	2.20105	1.13819
21507	0.165	-0.126	0.0655	0.0241	0.508	0.621	0.442	0.481	0.395	0.128	0.244	-0.0737	-0.313	0.167	1.68958	0.0810896	0.000140376	0.494831	Induced	1		gene symbol=[LYPD3], gene=[LY6/PLAUR domain containing 3], gb=[NM_014400], gi=[93004087]			13	19	LYPD3	3.73934	1.90278	1.68958	0.756669
27387	-0.382	-0.131	-0.292	-0.0499	0.613	0.712	0.234	0.647	0.304	0.594	0.585	0.38	0.332	0.487	5.0411	4.49714e-06	0.000419844	5.71469e-05	Induced	1		gene symbol=[INHBA], gene=[inhibin, beta A], gb=[NM_002192], gi=[62953137]			13	19	INHBA	3.92611	1.9731	5.0411	2.33374
25188	-0.239	-0.00544	-0.174	-0.0629	0.427	0.497	0.2	0.33	0.263	0.16	0.566	0.0548	0.0286	0.102	2.41643	0.00128493	0.00025677	0.0204287	Induced	1		gene symbol=[PDCD4], gene=[programmed cell death 4 (neoplastic transformation inhibitor)], gb=[NM_145341], gi=[34304341]			13	19	PDCD4	3.93827	1.97756	2.41643	1.27288
10061	-0.00768	-0.0138	0.0544	0.0167	0.581	0.853	0.343	0.438	0.829	0.0401	0.4	0.213	0.589	0.337	2.81777	0.00256095	0.000689222	0.0116816	Induced	1		gene symbol=[TREM1], gene=[triggering receptor expressed on myeloid cells 1], gb=[NM_018643], gi=[31543823]			13	19	TREM1	4.52486	2.17787	2.81777	1.49455
31387	-0.153	-0.0654	-0.0163	-0.253	0.172	0.186	0.238	0.179	0.202	-0.0543	-0.39	0.179	0.189	0.0984	1.66661	0.025471	0.000143267	0.182599	Induced	1		gene symbol=[ZIM2///PEG3], gene=[zinc finger, imprinted 2///paternally expressed 3], gb=[T26612], gi=[773929]			13	25	ZIM2///PEG3	5.06061	2.33931	1.66661	0.73692
41860	0.0384	0.0623	0.0334	0.0554	0.319	0.415	0.298	0.349	0.0874	0.218	0.617	0.115	0.159	0.138	1.67558	0.0101579	0.00289106	0.0493884	Induced	1		gene symbol=[PAM], gene=[peptidylglycine alpha-amidating monooxygenase], gb=[NM_000919], gi=[21070983]			13	17	PAM	5.38978	2.43023	1.67558	0.74466
1526	-0.206	-0.515	-0.0548	-0.107	0.0641	0.263	0.139	0.212	0.0713	0.104	0.677	-0.188	-0.0354	-0.173	2.15824	0.0174565	0.00392023	0.091864	Induced	1		gene symbol=[LOC729082///KRTAP4-7], gene=[hypothetical protein LOC729082///keratin associated protein 4-7], gb=[BX648343], gi=[34367502]			13	34	LOC729082///KRTAP4-7	5.62252	2.49122	2.15824	1.10986
24210	-0.0968	0.00135	-0.215	0.0963	0.739	0.633	0.271	0.492	0.303	0.438	0.477	0.453	0.351	0.275	3.13861	5.51584e-05	0.00129757	0.000213074	Induced	1		gene symbol=[EBI3], gene=[Epstein-Barr virus induced gene 3], gb=[NM_005755], gi=[14577916]			13	18	EBI3	11.987	3.5834	3.13861	1.65013
11363	-0.154	0.0143	-0.114	0.185	0.508	0.437	0.365	0.265	0.577	0.215	0.483	0.226	0.53	0.112	2.44892	0.00063953	0.000864676	0.0116865	Induced	1		gene symbol=[ARRDC3], gene=[arrestin domain containing 3], gb=[NM_020801], gi=[32698735]			13	20	ARRDC3	15.129	3.91925	2.44892	1.29215
18338	-0.194	-0.38	-0.186	-0.0415	0.477	0.274	0.187	0.057	0.573	0.227	0.107	0.293	0.175	-0.119	2.66364	0.00110829	0.00206844	0.00618561	Induced	1		gene symbol=[ARRDC3], gene=[arrestin domain containing 3], gb=[NM_020801], gi=[32698735]			13	20	ARRDC3	15.129	3.91925	2.66364	1.4134
21400	0.0433	-0.0991	0.147	0.0947	0.269	0.547	0.339	0.423	0.503	0.0698	0.205	0.112	0.36	0.12	1.77135	0.00937178	0.000806007	0.0666044	Induced	1		gene symbol=[TMEM45A], gene=[transmembrane protein 45A], gb=[NM_018004], gi=[8922242]			13	21	TMEM45A	15.3934	3.94424	1.77135	0.824851

## Sheet: Suppl Table IIb
	According to Haimov et al, 2007		Present study
Symbol	Induction ratio (term vs early placenta)	log of induction ratio	STOX1	LOG(of induction ratio (STOX1 overexpression vs no STOX1))	log of induction ratio
PMS2	1.4	0.485427	0.237624	-2.07325	0.485427
ZNF703	1.52	0.604071	0.319261	-1.64719	0.604071
SKP2	-1.72	-0.782409	0.32626	-1.61591	-0.782409
HBD	1.73	0.790772	0.346801	-1.52782	0.790772
MKNK1	-1.28	-0.356144	0.357773	-1.48288	-0.356144
GLRX2	-1.47	-0.555816	0.388889	-1.36257	-0.555816
TCF7L2	-1.71	-0.773996	0.392758	-1.34829	-0.773996
TCF7L2	1.71	0.773996	0.392758	-1.34829	0.773996
TCF7L2	-1.9	-0.925999	0.392758	-1.34829	-0.925999
TCF7L2	-2.04	-1.02857	0.392758	-1.34829	-1.02857
TCF7L2	-2.74	-1.45418	0.392758	-1.34829	-1.45418
RDH13	1.65	0.722466	0.397624	-1.33052	0.722466
STK17A	1.57	0.650765	0.401542	-1.31638	0.650765
BCL2	1.38	0.464668	0.40746	-1.29527	0.464668
STS-1	-1.52	-0.604071	0.408451	-1.29177	-0.604071
STS-1	-1.9	-0.925999	0.408451	-1.29177	-0.925999
HN1	-1.89	-0.918386	0.419446	-1.25344	-0.918386
LOC285550	-1.45	-0.536053	0.420455	-1.24998	-0.536053
ASS	-1.92	-0.941106	0.423488	-1.23961	-0.941106
SLC35D1	-1.63	-0.704872	0.425517	-1.23271	-0.704872
SLC35D1	-2.04	-1.02857	0.425517	-1.23271	-1.02857
CSTA	-2.06	-1.04264	0.426534	-1.22927	-1.04264
LOC283278	1.38	0.464668	0.430615	-1.21553	0.464668
MMP19	-1.56	-0.641546	0.441961	-1.17801	-0.641546
COL5A2	-1.68	-0.748461	0.449275	-1.15433	-0.748461
OAT	-2.03	-1.02148	0.453488	-1.14086	-1.02148
POP5	1.37	0.454176	0.455604	-1.13415	0.454176
ATP1B1	-2.13	-1.09085	0.466276	-1.10074	-1.09085
TMEM14A	1.52	0.604071	0.478197	-1.06432	0.604071
ASAM	-1.67	-0.739848	0.481481	-1.05445	-0.739848
ASAM	-2.7	-1.43296	0.481481	-1.05445	-1.43296
C10orf10	-1.52	-0.604071	0.48368	-1.04788	-0.604071
CDC42SE1	1.48	0.565597	0.492537	-1.0217	0.565597
GLB1	-1.59	-0.669027	0.493652	-1.01843	-0.669027
LOC91461	-1.68	-0.748461	0.493652	-1.01843	-0.748461
RPS2	-1.41	-0.495695	0.493652	-1.01843	-0.495695
RPS2	1.54	0.62293	0.493652	-1.01843	0.62293
TUB	1.29	0.367371	0.493652	-1.01843	0.367371
SEPT	1.44	0.526069	0.495886	-1.01192	0.526069
RAP2B	-1.51	-0.594549	0.504891	-0.985956	-0.594549
RAP2B	-1.75	-0.807355	0.504891	-0.985956	-0.807355
FKBP11	-1.88	-0.910733	0.510574	-0.969808	-0.910733
FKBP11	-1.9	-0.925999	0.510574	-0.969808	-0.925999
CHPT1	-1.72	-0.782409	0.515152	-0.956931	-0.782409
WARS	1.82	0.863938	0.52207	-0.937685	0.863938
FABP5	2.07	1.04963	0.529052	-0.918519	1.04963
WDR1	1.38	0.464668	0.533742	-0.905785	0.464668
PLEKHA6	1.64	0.713696	0.54202	-0.883582	0.713696
ACTN1	-1.94	-0.956057	0.54679	-0.87094	-0.956057
SRPRB	-1.5	-0.584963	0.547988	-0.867785	-0.584963
TPM1	-2.26	-1.17632	0.549187	-0.864631	-1.17632
CD24	1.48	0.565597	0.567398	-0.817567	0.565597
CD24	-1.6	-0.678072	0.567398	-0.817567	-0.678072
CD24	-1.62	-0.695994	0.567398	-0.817567	-0.695994
CD24	-1.88	-0.910733	0.567398	-0.817567	-0.910733
KIF2	2.16	1.11103	0.581028	-0.783321	1.11103
KIF2	1.73	0.790772	0.581028	-0.783321	0.790772
SPRY4	1.43	0.516015	0.583531	-0.777118	0.516015
BOLA3	-1.63	-0.704872	0.584786	-0.774019	-0.704872
SLC23A2	1.56	0.641546	0.59109	-0.758551	0.641546
NBN	-1.73	-0.790772	0.597444	-0.743124	-0.790772
IL1R2	-2.78	-1.47508	0.598721	-0.740044	-1.47508
CSTB	1.62	0.695994	0.6	-0.736966	0.695994
ERG	1.98	0.9855	0.603849	-0.72774	0.9855
LPL	4.6	2.20163	0.607717	-0.718528	2.20163
LPL	3.71	1.89142	0.607717	-0.718528	1.89142
KCNE3	-1.44	-0.526069	0.612903	-0.706269	-0.526069
MAP4	-1.42	-0.505891	0.612903	-0.706269	-0.505891
HSPE1	-1.59	-0.669027	0.615509	-0.700148	-0.669027
EMP2	2.02	1.01436	0.616815	-0.697091	1.01436
EMP2	1.84	0.879706	0.616815	-0.697091	0.879706
NPL	-1.85	-0.887525	0.616815	-0.697091	-0.887525
CYFIP2	-1.49	-0.575312	0.620746	-0.687926	-0.575312
PBP	-1.4	-0.485427	0.620746	-0.687926	-0.485427
PBP	-1.5	-0.584963	0.620746	-0.687926	-0.584963
CHST12	1.38	0.464668	0.623377	-0.681824	0.464668
TUBB	-1.6	-0.678072	0.628664	-0.669638	-0.678072
CA1	1.29	0.367371	0.632653	-0.660514	0.367371
UNG	1.43	0.516015	0.632653	-0.660514	0.516015
SLC24A3	-1.49	-0.575312	0.639344	-0.645335	-0.575312
SLC24A3	-1.69	-0.757023	0.639344	-0.645335	-0.757023
C11orf1	-1.33	-0.411426	0.651528	-0.618102	-0.411426
C1orf151	1.53	0.613532	0.652893	-0.615082	0.613532
TRIM45	1.3	0.378512	0.658375	-0.603019	0.378512
ATP5E	-1.75	-0.807355	0.668057	-0.581958	-0.807355
CCNB1	-1.59	-0.669027	0.669449	-0.578954	-0.669027
C16orf33	-1.39	-0.475085	0.67364	-0.56995	-0.475085
ENSA	1.33	0.411426	0.67364	-0.56995	0.411426
C2orf4	-1.66	-0.731183	0.697793	-0.519129	-0.731183
HINT1	-1.47	-0.555816	0.702128	-0.510195	-0.555816
HINT1	-1.51	-0.594549	0.702128	-0.510195	-0.594549
RPL13	-1.38	-0.464668	0.716738	-0.480482	-0.464668
CTSC	-1.64	-0.713696	0.71969	-0.474552	-0.713696
CTSC	-1.71	-0.773996	0.71969	-0.474552	-0.773996
LDB1	1.32	0.400538	0.722653	-0.468625	0.400538
NOTCH4	1.47	0.555816	0.727116	-0.459743	0.555816
RPL12	-1.27	-0.344828	0.740644	-0.433148	-0.344828
RPL12	-1.5	-0.584963	0.740644	-0.433148	-0.584963
LMO2	1.66	0.731183	0.748252	-0.418404	0.731183
RBMS1	1.41	0.495695	0.754386	-0.406625	0.495695
MARVELD1	-1.51	-0.594549	0.77305	-0.371367	-0.594549
PECAM1	2.26	1.17632	0.77305	-0.371367	1.17632
PECAM1	2.09	1.0635	0.77305	-0.371367	1.0635
PECAM1	1.95	0.963474	0.77305	-0.371367	0.963474
S100A10	-1.44	-0.526069	0.777778	-0.36257	-0.526069
POLR2G	-1.28	-0.356144	0.779359	-0.359639	-0.356144
RPS10	1.41	0.495695	0.784121	-0.350851	0.495695
FHL1	2.37	1.24489	0.788909	-0.34207	1.24489
FHL1	2.06	1.04264	0.788909	-0.34207	1.04264
FHL1	2.03	1.02148	0.788909	-0.34207	1.02148
SAT2	1.54	0.62293	0.793722	-0.333294	0.62293
H2AFZ	-1.5	-0.584963	0.798561	-0.324525	-0.584963
SFRP1	-2.11	-1.07724	0.801802	-0.318682	-1.07724
COBLL1	1.59	0.669027	0.806685	-0.309923	0.669027
ARHGAP10	1.29	0.367371	0.808318	-0.307005	0.367371
SFRS5	1.56	0.641546	0.809955	-0.304087	0.641546
CDYL	1.43	0.516015	0.813237	-0.298253	0.516015
RAB31	-1.58	-0.659925	0.819836	-0.286592	-0.659925
RAB31	1.62	0.695994	0.819836	-0.286592	0.695994
MRPL51	-1.38	-0.464668	0.823154	-0.280766	-0.464668
MOBKL2B	1.29	0.367371	0.829826	-0.269119	0.367371
GLUL	-1.73	-0.790772	0.834862	-0.26039	-0.790772
ZNF238	1.25	0.321928	0.836547	-0.257481	0.321928
BASP1	-1.33	-0.411426	0.838235	-0.254573	-0.411426
CYP19A1	2.27	1.18269	0.841621	-0.248758	1.18269
CYP19A1	1.97	0.978196	0.841621	-0.248758	0.978196
CYP19A1	1.5	0.584963	0.841621	-0.248758	0.584963
RPL26	-1.27	-0.344828	0.841621	-0.248758	-0.344828
EGFR	1.87	0.903038	0.845745	-0.241706	0.903038
LEPRE1	-1.65	-0.722466	0.846722	-0.24004	-0.722466
MRPS9	-1.36	-0.443607	0.853568	-0.228422	-0.443607
SOX4	-1.52	-0.604071	0.853568	-0.228422	-0.604071
SOX4	-2.88	-1.52607	0.853568	-0.228422	-1.52607
DBI	-1.59	-0.669027	0.855288	-0.225519	-0.669027
DBI	-1.68	-0.748461	0.855288	-0.225519	-0.748461
MME	-1.67	-0.739848	0.85701	-0.222616	-0.739848
LDLR	-1.73	-0.790772	0.858736	-0.219713	-0.790772
NAP1L1	1.37	0.454176	0.858736	-0.219713	0.454176
NAP1L1	1.38	0.464668	0.858736	-0.219713	0.464668
NAP1L1	-1.59	-0.669027	0.858736	-0.219713	-0.669027
RASAL2	1.74	0.799087	0.863933	-0.211009	0.799087
LGALS3	-2.1	-1.07039	0.876173	-0.190713	-1.07039
DSCR2	1.52	0.604071	0.877934	-0.187815	0.604071
COX6C	-1.35	-0.432959	0.881468	-0.182021	-0.432959
MAN1A1	-2.18	-1.12433	0.885014	-0.176228	-1.12433
INDO	1.69	0.757023	0.888112	-0.171187	0.757023
ANKH	-1.59	-0.669027	0.892148	-0.164646	-0.669027
ANKHD1	1.69	0.757023	0.892148	-0.164646	0.757023
GJA1	-2.08	-1.05658	0.893939	-0.161751	-1.05658
CRH	10.38	3.37573	0.901141	-0.150176	3.37573
MRPL40	-1.42	-0.505891	0.90295	-0.147283	-0.505891
ALPP	7.46	2.89918	0.904762	-0.14439	2.89918
LOH11CR2A	1.6	0.678072	0.904762	-0.14439	0.678072
PPL	1.63	0.704872	0.904762	-0.14439	0.704872
RPL31	-1.33	-0.411426	0.919386	-0.121258	-0.411426
DAP3	1.33	0.411426	0.92123	-0.118367	0.411426
UGDH	-2.08	-1.05658	0.937984	-0.092364	-1.05658
C9orf13	2.61	1.38405	0.940994	-0.0877429	1.38405
NEB	1.77	0.823749	0.941748	-0.0865877	0.823749
CALM2	1.41	0.495695	0.943635	-0.0836998	0.495695
ENO1	-1.63	-0.704872	0.943635	-0.0836998	-0.704872
FADS1	-1.64	-0.713696	0.945525	-0.080812	-0.713696
CDH11	-2.03	-1.02148	0.947208	-0.0782466	-1.02148
CDH11	-3.44	-1.78241	0.947208	-0.0782466	-1.78241
BRWD1	1.55	0.632268	0.94742	-0.0779245	0.632268
MAN2A2	1.31	0.389567	0.94742	-0.0779245	0.389567
MRPS21	-1.49	-0.575312	0.95122	-0.0721498	-0.575312
SERPINF1	-1.57	-0.650765	0.953125	-0.0692627	-0.650765
GSTo1	-1.51	-0.594549	0.956947	-0.0634888	-0.594549
RPLP	-1.42	-0.505891	0.964637	-0.0519426	-0.505891
RPLP	-1.44	-0.526069	0.964637	-0.0519426	-0.526069
RPLP	-1.45	-0.536053	0.964637	-0.0519426	-0.536053
RPLP	-1.47	-0.555816	0.964637	-0.0519426	-0.555816
ALDH2	-1.46	-0.545968	0.966568	-0.0490564	-0.545968
COASY	1.57	0.650765	0.966568	-0.0490564	0.650765
ACAT2	1.31	0.389567	0.976285	-0.0346263	0.389567
TNRC15	1.25	0.321928	0.978239	-0.0317406	0.321928
NDRG2	1.53	0.613532	0.978641	-0.0311487	0.613532
NDRG2	1.35	0.432959	0.978641	-0.0311487	0.432959
ANGPTL2	-1.42	-0.505891	0.980198	-0.0288549	-0.505891
LOC92249	1.46	0.545968	0.980198	-0.0288549	0.545968
SPIRE1	1.47	0.555816	0.980198	-0.0288549	0.555816
PRKCA	1.72	0.782409	0.981408	-0.0270755	0.782409
LY96	-1.92	-0.941106	0.981413	-0.0270682	-0.941106
C18orf10	-1.68	-0.748461	0.982161	-0.0259692	-0.748461
MMRN2	1.77	0.823749	0.982428	-0.0255762	0.823749
MMRN2	1.68	0.748461	0.982428	-0.0255762	0.748461
SORT1	1.51	0.594549	0.988072	-0.0173125	0.594549
USP9X	1.5	0.584963	0.9889	-0.0161033	0.584963
GSDML	1.31	0.389567	0.988959	-0.0160174	0.389567
SPON1	-1.89	-0.918386	0.99005	-0.0144271	-0.918386
CXCL14	-3.06	-1.61353	0.990689	-0.0134958	-1.61353
CXCL14	-4	-2	0.990689	-0.0134958	-2
C20Orf160	1.47	0.555816	0.992032	-0.0115416	0.555816
PHYH	-1.97	-0.978196	0.992593	-0.0107264	-0.978196
BMP2K	-1.74	-0.799087	1	0	-0.799087
FLJ11292	2.68	1.42223	1	0	1.42223
FLJ11292	2.27	1.18269	1	0	1.18269
FLJ11292	1.94	0.956057	1	0	0.956057
HBB	3.62	1.85599	1	0	1.85599
HBB	3.3	1.72247	1	0	1.72247
HBB	2.92	1.54597	1	0	1.54597
IL6ST	-1.65	-0.722466	1	0	-0.722466
PAPPA	2.38	1.25096	1	0	1.25096
PAPPA	1.74	0.799087	1	0	0.799087
PAPPA	1.55	0.632268	1	0	0.632268
RAB3B	1.97	0.978196	1	0	0.978196
RAB3B	1.62	0.695994	1	0	0.695994
RPL35A	-1.4	-0.485427	1	0	-0.485427
SGEF	1.4	0.485427	1	0	0.485427
SVEP1	2.15	1.10434	1	0	1.10434
KLF2	1.85	0.887525	1.00401	0.00577079	0.887525
UQCRB	1.32	0.400538	1.01207	0.0173125	0.400538
KREMEN1	1.61	0.687061	1.03046	0.0432841	0.687061
MTMR4	1.91	0.933573	1.03046	0.0432841	0.933573
MTMR4	1.91	0.933573	1.03046	0.0432841	0.933573
ROBo4	1.69	0.757023	1.03252	0.0461702	0.757023
MAGED1	-1.56	-0.641546	1.03666	0.0519426	-0.641546
PRKD3	-1.95	-0.963474	1.03874	0.054829	-0.963474
PRDX2	-2	-1	1.04499	0.0634888	-1
HMGN3	-1.72	-0.782409	1.05128	0.0721498	-0.782409
BCAT1	-1.98	-0.9855	1.06612	0.092364	-0.9855
LDB2	1.34	0.422233	1.07684	0.106808	0.422233
ADAM9	-1.99	-0.992768	1.07995	0.110964	-0.992768
COL5A1	-2.05	-1.03562	1.08117	0.112587	-1.03562
COL5A1	-2.08	-1.05658	1.08117	0.112587	-1.05658
CCR1	-1.47	-0.555816	1.08768	0.121258	-0.555816
AIG1	-1.61	-0.687061	1.08986	0.124148	-0.687061
PACSIN3	1.54	0.62293	1.09205	0.127039	0.62293
PPP3CA	-1.67	-0.739848	1.10283	0.141207	-0.739848
RPL6	1.34	0.422233	1.10748	0.147283	0.422233
MRPS33	-1.45	-0.536053	1.1097	0.150176	-0.536053
PRDX4	-1.75	-0.807355	1.1097	0.150176	-0.807355
Gcom1	1.73	0.790772	1.13447	0.182021	0.790772
PCOLCE	-2.12	-1.08406	1.13675	0.184918	-1.08406
ADH5	-1.56	-0.641546	1.14823	0.199409	-0.641546
CITED2	-2.21	-1.14405	1.14823	0.199409	-1.14405
MUC15	3.19	1.67356	1.15285	0.205208	1.67356
MUC15	2.43	1.28096	1.15285	0.205208	1.28096
RPS15A	-1.29	-0.367371	1.1575	0.211009	-0.367371
TMEM43	1.46	0.545968	1.15983	0.21391	0.545968
GGH	-2.18	-1.12433	1.16216	0.216811	-1.12433
GTF2H5	1.62	0.695994	1.1692	0.225519	0.695994
RPL7A	-1.28	-0.356144	1.17391	0.231326	-0.356144
RPL7A	-1.33	-0.411426	1.17391	0.231326	-0.411426
RPL7A	-1.48	-0.565597	1.17391	0.231326	-0.565597
RGS10	-1.64	-0.713696	1.18103	0.24004	-0.713696
IDH1	-1.85	-0.887525	1.18579	0.245851	-0.887525
MC1R	1.54	0.62293	1.20264	0.266209	0.62293
EFHD1	2.03	1.02148	1.25734	0.330371	1.02148
DOCK5	-1.93	-0.948601	1.25981	0.333207	-0.948601
HECW2	1.76	0.815575	1.29358	0.371367	0.815575
DAPK1	2.23	1.15704	1.3175	0.3978	1.15704
DAPK1	1.92	0.941106	1.3175	0.3978	0.941106
FGD4	1.38	0.464668	1.331	0.412513	0.464668
SLC2A10	-2.06	-1.04264	1.33645	0.418404	-1.04264
MCPH1	-3.78	-1.91839	1.33918	0.421351	-1.91839
RASGRF2	-1.74	-0.799087	1.34467	0.427248	-0.799087
C1Orf115	1.61	0.687061	1.35849	0.442005	0.687061
SESTD1	-1.94	-0.956057	1.36686	0.45087	-0.956057
SPP1	-2.16	-1.11103	1.36686	0.45087	-1.11103
USP6NL	1.38	0.464668	1.36686	0.45087	0.464668
ABL1	-1.48	-0.565597	1.38379	0.468625	-0.565597
MCM6	-1.67	-0.739848	1.38949	0.474552	-0.739848
PPM1H	-2.04	-1.02857	1.39234	0.477516	-1.02857
RGL2	1.42	0.505891	1.39234	0.477516	0.505891
CAPN6	1.78	0.831877	1.39521	0.480482	0.831877
C9orf123	1.44	0.526069	1.41546	0.50127	0.526069
CTNNBIP1	1.29	0.367371	1.42718	0.513172	0.367371
HOMER1	-1.59	-0.669027	1.43605	0.52211	-0.669027
RPL36AL	-1.44	-0.526069	1.45399	0.540015	-0.526069
XPC	1.23	0.298658	1.457	0.543003	0.298658
CREG1	-1.91	-0.933573	1.47219	0.557962	-0.933573
PERLD1	1.45	0.536053	1.48139	0.566951	0.536053
LDHA	-1.65	-0.722466	1.49066	0.575951	-0.722466
BAMBI	-2.02	-1.01436	1.50313	0.587969	-1.01436
EFEMP1	-1.69	-0.757023	1.50627	0.590976	-0.757023
EFEMP1	-2.17	-1.1177	1.50627	0.590976	-1.1177
RND3	-1.98	-0.9855	1.53807	0.621122	-0.9855
PLAU	1.87	0.903038	1.574	0.654438	0.903038
HBE1	1.23	0.298658	1.64201	0.715461	0.298658
GPR116	1.65	0.722466	1.64901	0.721597	0.722466
CTSB	-1.67	-0.739848	1.68097	0.74929	-0.739848
STC1	-1.71	-0.773996	1.82885	0.87094	-0.773996
GPR157	1.43	0.516015	1.86533	0.899431	0.516015
SERPING1	-2.24	-1.1635	1.94551	0.960147	-1.1635
GAS1	-3.1	-1.63227	1.95421	0.966585	-1.63227
CMAH	1.47	0.555816	1.98507	0.989193	0.555816
FRAT1	1.3	0.378512	2.05344	1.03804	0.378512
ZNF256	1.25	0.321928	2.05344	1.03804	0.321928
CMYA5	1.26	0.333424	2.14465	1.10074	0.333424
DPP4	-1.74	-0.799087	2.15457	1.1074	-0.799087
EXPH5	2.07	1.04963	2.38409	1.25344	1.04963
FAM46A	1.64	0.713696	2.48432	1.31285	0.713696
PLOD2	-1.89	-0.918386	2.68324	1.42398	-0.918386
PLOD2	-2.82	-1.4957	2.68324	1.42398	-1.4957
FBXL5	-1.75	-0.807355	2.71747	1.44227	-0.807355
CCNG2	-1.39	-0.475085	3.01606	1.59267	-0.475085
CCNG2	-2.03	-1.02148	3.01606	1.59267	-1.02148
PLCL2	2.13	1.09085	3.0404	1.60426	1.09085
PLCL2	1.77	0.823749	3.0404	1.60426	0.823749
HAPLN1	-2.88	-1.52607	3.11523	1.63934	-1.52607
HAPLN1	-3.89	-1.95977	3.11523	1.63934	-1.95977
NRN1	2.17	1.1177	3.1841	1.67089	1.1177
PCK2	-1.24	-0.31034	3.58716	1.84284	-0.31034
ZNF91	1.92	0.941106	3.60829	1.85132	0.941106
SLC7A2	1.93	0.948601	3.79616	1.92454	0.948601
SLC7A2	1.7	0.765535	3.79616	1.92454	0.765535
RORA	1.48	0.565597	4.93472	2.30297	0.565597
RORA	1.28	0.356144	4.93472	2.30297	0.356144
P4HA1	-1.56	-0.641546	6.87402	2.78115	-0.641546
PLAC8	-2.2	-1.1375	9.15228	3.19413	-1.1375
