# Supplementary material for: STOX1 Overexpression in Choriocarcinoma Cells Mimics Transcriptional Alterations Observed in Preeclamptic Placentas
Source: PLoS One. 2008 Dec 11;3(12):e3905. doi: 10.1371/journal.pone.0003905 (PMC2592700; doi:10.1371/journal.pone.0003905)
Supplement: Table S3 — Observed versus expected between Stox1 overexpressed genes and 265 genes strongly modified in preeclamptic placentas (According to Nishizawa et al, 2007). Statsitical comparisons (Chi2 tests) for modified categories of genes at three threshold between preeclampsia effects and STOX1 overexpression effects (0.02 MB XLS) [file pone.0003905.s003.xls]

## Sheet: Feuil1
Supplemental Table 3
Observed versus expected between Stox1 overexpressed genes and 265 genes strongly modified in preeclamptic placentas (According to Nishizawa et al, 2007)
Thresholds	>2 or <0,5	>1,8 or <0,55	>1,5 or < 0,66
Observed	59	77	95	Consistent
	7	8	20	Inconsistent
Expected	19.14	26.59	44.9	Consistent
	13.81	19.94	37.18	Inconsistent
Chi2	1,5 10-20	3,9 10-24	1,35 10-15
