# Supplementary material for: STOX1 Overexpression in Choriocarcinoma Cells Mimics Transcriptional Alterations Observed in Preeclamptic Placentas
Source: PLoS One. 2008 Dec 11;3(12):e3905. doi: 10.1371/journal.pone.0003905 (PMC2592700; doi:10.1371/journal.pone.0003905)
Supplement: Table S4 — AA6 column corresponds to the cells overexpressing STOX1. BD3 to the control cells transfected with empty pCMX vector (4.43 MB XLS) [file pone.0003905.s004.xls]

## Sheet: liste
sondes	genes	noms	AA6-clone-STOXA	BD3-clone-neg	STOXA/neg	AA6.clone.STOXA	BD3.clone.neg	tot	Paper ishizawa
209369_at	ANXA3	annexin A3	0.0172	1.983	0.00867373	1	1	PP	variable
209569_x_at	D4S234E*	DNA segment on chromosome 4 (unique) 234 expressed sequence	0.0601	1.94	0.0309794	0	1	P50
1559901_s_at	C21ORF34*	chromosome 21 open reading frame 34	0.0821	1.918	0.042805	0	1	P50
218005_at	ZNF22*	zinc finger protein 22 (KOX 15)	0.0827	1.917	0.0431403	0	1	P50
227705_at	TCEAL7	transcription elongation factor A (SII)-like 7	0.0851	1.915	0.0444386	1	1	PP
219466_s_at	APOA2	apolipoprotein A-II	0.0896	1.91	0.046911	0	1	P50
214749_s_at	ARMCX6	armadillo repeat containing, X-linked 6	0.0978	1.902	0.0514196	1	1	PP
217858_s_at	ARMCX3*	armadillo repeat containing, X-linked 3	0.11	1.89	0.0582011	0	1	P50
227410_at	FAM43A	family with sequence similarity 43, member A	0.115	1.885	0.061008	0	1	P50
1556166_x_at			0.121	1.879	0.064396	0	1	P50
1556165_at			0.122	1.878	0.0649627	0	1	P50
234190_at			0.134	1.866	0.0718114	1	1	PP
216604_s_at	SLC7A8*	solute carrier family 7 (cationic amino acid transporter, y+ system), member 8	0.138	1.862	0.0741139	1	1	PP
209570_s_at	D4S234E*	DNA segment on chromosome 4 (unique) 234 expressed sequence	0.14	1.86	0.0752688	0	1	P50
228262_at	MAP7D2	MAP7 domain containing 2	0.14	1.86	0.0752688	0	1	P50
218006_s_at	ZNF22*	zinc finger protein 22 (KOX 15)	0.142	1.858	0.0764263	0	1	P50
235700_at	RP13-36C9.3*	cancer/testis antigen CT45-3	0.142	1.858	0.0764263	0	1	P50
1555630_a_at	RAB34*	RAB34, member RAS oncogene family	0.175	1.825	0.0958904	0	1	P50
202510_s_at	TNFAIP2	tumor necrosis factor, alpha-induced protein 2	0.202	1.798	0.112347	1	1	PP
231846_at	FOXRED2	FAD-dependent oxidoreductase domain containing 2	0.207	1.793	0.115449	0	1	P50
210933_s_at	FSCN1*	fascin homolog 1, actin-bundling protein (Strongylocentrotus purpuratus)	0.211	1.789	0.117943	1	1	PP
224909_s_at	PREX1*	phosphatidylinositol 3,4,5-trisphosphate-dependent RAC exchanger 1	0.245	1.755	0.139601	1	1	PP
237461_at	NLRP7	NLR family, pyrin domain containing 7	0.247	1.753	0.140901	1	1	PP
201564_s_at	FSCN1*	fascin homolog 1, actin-bundling protein (Strongylocentrotus purpuratus)	0.253	1.747	0.14482	1	1	PP
224710_at	RAB34*	RAB34, member RAS oncogene family	0.254	1.746	0.145475	0	1	P50
213547_at	CAND2	cullin-associated and neddylation-dissociated 2 (putative)	0.258	1.742	0.148106	0	1	P50
216603_at	SLC7A8*	solute carrier family 7 (cationic amino acid transporter, y+ system), member 8	0.258	1.742	0.148106	0	1	P50
213533_at	D4S234E*	DNA segment on chromosome 4 (unique) 234 expressed sequence	0.269	1.731	0.155402	0	1	P50
223707_at	MGC10850	hypothetical protein MGC10850	0.287	1.713	0.167542	1	1	PP
1567912_s_at	RP13-36C9.3*	cancer/testis antigen CT45-3	0.29	1.71	0.169591	0	1	P50
243174_at			0.29	1.71	0.169591	1	1	PP
232254_at	FBXO25*	F-box protein 25	0.298	1.702	0.175088	1	1	PP
201467_s_at	NQO1*	NAD(P)H dehydrogenase, quinone 1	0.299	1.701	0.175779	1	1	PP
1556395_at			0.301	1.699	0.177163	1	1	PP
226702_at	LOC129607	hypothetical protein LOC129607	0.301	1.699	0.177163	0	1	P50
200879_s_at	EPAS1*	endothelial PAS domain protein 1	0.302	1.698	0.177856	1	1	PP
203088_at	FBLN5	fibulin 5	0.305	1.695	0.179941	0	1	P50
224925_at	PREX1*	phosphatidylinositol 3,4,5-trisphosphate-dependent RAC exchanger 1	0.306	1.694	0.180638	0	1	P50
202664_at	WIPF1*	WAS/WASL interacting protein family, member 1	0.311	1.689	0.184133	0	1	P50
1557067_s_at	LUC7L*	LUC7-like (S. cerevisiae)	0.315	1.685	0.186944	1	1	PP
206247_at	MICB	MHC class I polypeptide-related sequence B	0.316	1.684	0.187648	1	1	PP
212915_at	PDZRN3*	PDZ domain containing RING finger 3	0.316	1.684	0.187648	1	1	PP
206525_at	GABRR1	gamma-aminobutyric acid (GABA) receptor, rho 1	0.318	1.682	0.189061	0	1	P50
202957_at	HCLS1	hematopoietic cell-specific Lyn substrate 1	0.321	1.679	0.191185	1	1	PP
210519_s_at	NQO1*	NAD(P)H dehydrogenase, quinone 1	0.321	1.679	0.191185	1	1	PP
201010_s_at	TXNIP	thioredoxin interacting protein	0.329	1.671	0.196888	0	1	P50
210004_at	OLR1	oxidized low density lipoprotein (lectin-like) receptor 1	0.33	1.67	0.197605	1	1	PP
229143_at	CNOT3*	CCR4-NOT transcription complex, subunit 3	0.331	1.669	0.198322	1	1	PP
224469_s_at	C14ORF173*	chromosome 14 open reading frame 173	0.334	1.666	0.20048	1	1	PP
212473_s_at	MICAL2*	microtubule associated monoxygenase, calponin and LIM domain containing 2	0.335	1.665	0.201201	1	1	PP
208998_at	UCP2	uncoupling protein 2 (mitochondrial, proton carrier)	0.336	1.664	0.201923	0	1	P50
228935_at	SLC4A8*	solute carrier family 4, sodium bicarbonate cotransporter, member 8	0.34	1.66	0.204819	1	1	PP
228948_at	EPHA4*	EPH receptor A4	0.34	1.66	0.204819	0	1	P50
1569349_at	C11ORF30*	chromosome 11 open reading frame 30	0.341	1.659	0.205546	1	1	PP
211029_x_at	FGF18*	fibroblast growth factor 18	0.342	1.658	0.206273	1	1	PP
212012_at	PXDN*	peroxidasin homolog (Drosophila)	0.342	1.658	0.206273	1	1	PP
204083_s_at	TPM2*	tropomyosin 2 (beta)	0.343	1.657	0.207001	1	1	PP
1558164_s_at	PEX13*	peroxisome biogenesis factor 13	0.344	1.656	0.207729	0	1	P50
243918_at			0.344	1.656	0.207729	0	1	P50
206028_s_at	MERTK*	c-mer proto-oncogene tyrosine kinase	0.345	1.655	0.208459	1	1	PP
205547_s_at	TAGLN	transgelin	0.347	1.653	0.209921	1	1	PP
204517_at	PPIC*	peptidylprolyl isomerase C (cyclophilin C)	0.348	1.652	0.210654	1	1	PP
242787_at			0.349	1.651	0.211387	1	1	PP
200676_s_at	UBE2L3*	ubiquitin-conjugating enzyme E2L 3	0.35	1.65	0.212121	1	1	PP
1555639_a_at	RBM14*	RNA binding motif protein 14	0.351	1.649	0.212856	1	1	PP
201468_s_at	NQO1*	NAD(P)H dehydrogenase, quinone 1	0.353	1.647	0.214329	1	1	PP
203665_at	HMOX1	heme oxygenase (decycling) 1	0.353	1.647	0.214329	1	1	PP
205009_at	TFF1	trefoil factor 1	0.355	1.645	0.215805	1	1	PP
226898_s_at	SFPQ*	splicing factor proline/glutamine-rich (polypyrimidine tract binding protein associated)	0.355	1.645	0.215805	1	1	PP
212013_at	PXDN*	peroxidasin homolog (Drosophila)	0.357	1.643	0.217285	1	1	PP
209047_at	AQP1	aquaporin 1 (Colton blood group)	0.361	1.639	0.220256	0	1	P50
226847_at	FST*	follistatin	0.369	1.631	0.226242	1	1	PP
1554830_a_at	STEAP3*	STEAP family member 3	0.371	1.629	0.227747	0	1	P50
212472_at	MICAL2*	microtubule associated monoxygenase, calponin and LIM domain containing 2	0.372	1.628	0.228501	1	1	PP
215047_at	TRIM58	tripartite motif-containing 58	0.372	1.628	0.228501	0	1	P50
1554113_a_at	SLC4A8*	solute carrier family 4, sodium bicarbonate cotransporter, member 8	0.373	1.627	0.229256	1	1	PP
202134_s_at	WWTR1*	WW domain containing transcription regulator 1	0.374	1.626	0.230012	0	1	P50
205770_at	GSR*	glutathione reductase	0.374	1.626	0.230012	1	1	PP
238195_at			0.376	1.624	0.231527	1	1	PP
239574_at	ECHDC3*	enoyl Coenzyme A hydratase domain containing 3	0.376	1.624	0.231527	1	1	PP
200988_s_at	PSME3*	proteasome (prosome, macropain) activator subunit 3 (PA28 gamma; Ki)	0.378	1.622	0.233046	1	1	PP
221200_at			0.381	1.619	0.23533	1	1	PP
227529_s_at	AKAP12*	A kinase (PRKA) anchor protein (gravin) 12	0.384	1.616	0.237624	1	1	PP
228802_at	RBPMS2	RNA binding protein with multiple splicing 2	0.384	1.616	0.237624	0	1	P50
235060_at	LOC23117*	KIAA0220-like protein	0.384	1.616	0.237624	1	1	PP
231169_at	TXLNA*	taxilin alpha	0.385	1.615	0.23839	1	1	PP
228369_at	TNRC5*	trinucleotide repeat containing 5	0.386	1.614	0.239157	1	1	PP
226638_at	ARHGAP23*	Rho GTPase activating protein 23	0.389	1.611	0.241465	1	1	PP
228325_at	KIAA0146*	KIAA0146	0.389	1.611	0.241465	1	1	PP
1555216_a_at			0.392	1.608	0.243781	1	1	PP
1558021_at	RABEPK*	Rab9 effector protein with kelch motifs	0.392	1.608	0.243781	0	1	P50
1553315_at	SLFNL1	schlafen-like 1	0.394	1.606	0.24533	0	1	P50
228776_at	GJA7*	gap junction protein, alpha 7, 45kDa	0.394	1.606	0.24533	1	1	PP
235974_at	EXOC4*	exocyst complex component 4	0.395	1.605	0.246106	0	1	P50
232197_x_at	ARSB*	arylsulfatase B	0.396	1.604	0.246883	1	1	PP
218284_at	SMAD3*	SMAD family member 3	0.401	1.599	0.250782	1	1	PP
232181_at	LOC153346	hypothetical protein LOC153346	0.402	1.598	0.251564	1	1	PP
244264_at			0.404	1.596	0.253133	1	1	PP
1558487_a_at	TMED4*	transmembrane emp24 protein transport domain containing 4	0.406	1.594	0.254705	1	1	PP
201679_at	ARS2*	ARS2 protein	0.406	1.594	0.254705	0	1	P50
231195_at	KLRG2	killer cell lectin-like receptor subfamily G, member 2	0.406	1.594	0.254705	1	1	PP
205932_s_at	MSX1	msh homeobox 1	0.414	1.586	0.261034	1	1	PP
1553706_at	HTRA4	HtrA serine peptidase 4	0.415	1.585	0.26183	0	1	P50
223079_s_at	GLS*	glutaminase	0.418	1.582	0.264223	0	1	P50
212256_at	GALNT10*	UDP-N-acetyl-alpha-D-galactosamine:polypeptide N-acetylgalactosaminyltransferase 10 (GalNAc-T10)	0.419	1.581	0.265022	1	1	PP
216092_s_at	SLC7A8*	solute carrier family 7 (cationic amino acid transporter, y+ system), member 8	0.419	1.581	0.265022	1	1	PP
40560_at	TBX2	T-box 2	0.42	1.58	0.265823	0	1	P50
244766_at	SMG1*	PI-3-kinase-related kinase SMG-1	0.421	1.579	0.266624	1	1	PP
1566603_s_at	RPUSD3*	RNA pseudouridylate synthase domain containing 3	0.422	1.578	0.267427	1	1	PP
207509_s_at	LAIR2	leukocyte-associated immunoglobulin-like receptor 2	0.422	1.578	0.267427	1	1	PP
228950_s_at	GPR177*	G protein-coupled receptor 177	0.422	1.578	0.267427	1	1	PP
228949_at	GPR177*	G protein-coupled receptor 177	0.424	1.576	0.269036	1	1	PP
205461_at	RAB35*	RAB35, member RAS oncogene family	0.425	1.575	0.269841	0	1	P50
209644_x_at	CDKN2A*	cyclin-dependent kinase inhibitor 2A (melanoma, p16, inhibits CDK4)	0.426	1.574	0.270648	0	1	P50
225609_at	GSR*	glutathione reductase	0.426	1.574	0.270648	1	1	PP
219181_at	LIPG	lipase, endothelial	0.427	1.573	0.271456	0	1	P50
1555653_at	HNRPA3*	heterogeneous nuclear ribonucleoprotein A3	0.428	1.572	0.272265	1	1	PP
231382_at	FGF18*	fibroblast growth factor 18	0.428	1.572	0.272265	1	1	PP
220513_at	C6ORF148*	chromosome 6 open reading frame 148	0.429	1.571	0.273074	1	1	PP
225655_at	UHRF1	ubiquitin-like, containing PHD and RING finger domains, 1	0.429	1.571	0.273074	1	1	PP
204948_s_at	FST*	follistatin	0.43	1.57	0.273885	1	1	PP
206858_s_at	HOXC6	homeobox C6	0.43	1.57	0.273885	1	1	PP
212190_at	SERPINE2	serpin peptidase inhibitor, clade E (nexin, plasminogen activator inhibitor type 1), member 2	0.431	1.569	0.274697	1	1	PP
1558007_s_at	LCMT1*	leucine carboxyl methyltransferase 1	0.432	1.568	0.27551	1	1	PP
206976_s_at	HSPH1*	heat shock 105kDa/110kDa protein 1	0.432	1.568	0.27551	1	1	PP
213698_at	ZMYM6*	zinc finger, MYM-type 6	0.432	1.568	0.27551	1	1	PP
228049_x_at			0.432	1.568	0.27551	1	1	PP
202431_s_at	MYC	v-myc myelocytomatosis viral oncogene homolog (avian)	0.434	1.566	0.277139	1	1	PP
231067_s_at	AKAP12*	A kinase (PRKA) anchor protein (gravin) 12	0.434	1.566	0.277139	1	1	PP
1555935_s_at	HUNK	hormonally upregulated Neu-associated kinase	0.435	1.565	0.277955	1	1	PP
202752_x_at	SLC7A8*	solute carrier family 7 (cationic amino acid transporter, y+ system), member 8	0.435	1.565	0.277955	1	1	PP
223777_at	MGC13005	hypothetical protein MGC13005	0.435	1.565	0.277955	0	1	P50
223554_s_at	RANGRF*	RAN guanine nucleotide release factor	0.437	1.563	0.279591	0	1	P50
226632_at	CYGB*	cytoglobin	0.437	1.563	0.279591	1	1	PP
242918_at	NASP*	nuclear autoantigenic sperm protein (histone-binding)	0.437	1.563	0.279591	0	1	P50
225598_at	SLC45A4*	solute carrier family 45, member 4	0.438	1.562	0.28041	0	1	P50
204584_at	L1CAM	L1 cell adhesion molecule	0.439	1.561	0.28123	1	1	PP
46947_at	GNL3L (includes EG:54552)*	guanine nucleotide binding protein-like 3 (nucleolar)-like	0.439	1.561	0.28123	1	1	PP
227983_at	MGC7036	hypothetical protein MGC7036	0.44	1.56	0.282051	1	1	PP
212124_at	ZMIZ1	zinc finger, MIZ-type containing 1	0.441	1.559	0.282874	1	1	PP
213280_at	GARNL4	GTPase activating Rap/RanGAP domain-like 4	0.441	1.559	0.282874	0	1	P50
209765_at	ADAM19 (includes EG:8728)*	ADAM metallopeptidase domain 19 (meltrin beta)	0.442	1.558	0.283697	1	1	PP
209094_at	DDAH1	dimethylarginine dimethylaminohydrolase 1	0.444	1.556	0.285347	1	1	PP
225361_x_at	FAM122B*	family with sequence similarity 122B	0.444	1.556	0.285347	1	1	PP
209406_at	BAG2*	BCL2-associated athanogene 2	0.445	1.555	0.286174	1	1	PP
211600_at	PTPRO	protein tyrosine phosphatase, receptor type, O	0.445	1.555	0.286174	1	1	PP
1561266_at			0.446	1.554	0.287001	0	1	P50
220138_at	HAND1	heart and neural crest derivatives expressed 1	0.446	1.554	0.287001	1	1	PP
209616_s_at	CES1 (includes EG:1066)	carboxylesterase 1 (monocyte/macrophage serine esterase 1)	0.447	1.553	0.28783	0	1	P50
244841_at	SEC24A*	SEC24 related gene family, member A (S. cerevisiae)	0.447	1.553	0.28783	1	1	PP
203021_at	SLPI	secretory leukocyte peptidase inhibitor	0.448	1.552	0.28866	1	1	PP
213296_at			0.448	1.552	0.28866	0	1	P50
227617_at			0.448	1.552	0.28866	0	1	P50
1554216_at	CCDC132*	coiled-coil domain containing 132	0.45	1.55	0.290323	0	1	P50
221621_at			0.45	1.55	0.290323	1	1	PP
205046_at	CENPE	centromere protein E, 312kDa	0.451	1.549	0.291156	0	1	P50
1555500_s_at	SLC2A4RG*	SLC2A4 regulator	0.453	1.547	0.292825	1	1	PP
212701_at	TLN2*	talin 2	0.453	1.547	0.292825	0	1	P50
207345_at	FST*	follistatin	0.454	1.546	0.293661	1	1	PP
209760_at	KIAA0922	KIAA0922	0.454	1.546	0.293661	1	1	PP
222301_at	C1ORF61*	chromosome 1 open reading frame 61	0.454	1.546	0.293661	1	1	PP
202665_s_at	WIPF1*	WAS/WASL interacting protein family, member 1	0.455	1.545	0.294498	0	1	P50
214232_at	ABCF2*	ATP-binding cassette, sub-family F (GCN20), member 2	0.455	1.545	0.294498	1	1	PP
227482_at	ADCK1	aarF domain containing kinase 1	0.455	1.545	0.294498	1	1	PP
206269_at	GCM1	glial cells missing homolog 1 (Drosophila)	0.457	1.543	0.296176	1	1	PP
238271_x_at	KIAA0182*	KIAA0182	0.458	1.542	0.297017	1	1	PP
225186_at	RAPH1*	Ras association (RalGDS/AF-6) and pleckstrin homology domains 1	0.459	1.541	0.297859	0	1	P50
232116_at	GRHL3	grainyhead-like 3 (Drosophila)	0.459	1.541	0.297859	1	1	PP
231810_at	BRI3BP	BRI3 binding protein	0.46	1.54	0.298701	0	1	P50
206987_x_at	FGF18*	fibroblast growth factor 18	0.461	1.539	0.299545	1	1	PP
208307_at	RBMY1A1	RNA binding motif protein, Y-linked, family 1, member A1	0.461	1.539	0.299545	1	1	PP
229210_at	RNASEH2B*	ribonuclease H2, subunit B	0.463	1.537	0.301236	0	1	P50
228542_at	MRS2L*	MRS2-like, magnesium homeostasis factor (S. cerevisiae)	0.464	1.536	0.302083	0	1	P50
201042_at	TGM2*	transglutaminase 2 (C polypeptide, protein-glutamine-gamma-glutamyltransferase)	0.465	1.535	0.302932	0	1	P50
202586_at	POLR2L*	polymerase (RNA) II (DNA directed) polypeptide L, 7.6kDa	0.465	1.535	0.302932	1	1	PP
203404_at	ARMCX2	armadillo repeat containing, X-linked 2	0.467	1.533	0.304631	0	1	P50
222673_x_at	TMEM57*	transmembrane protein 57	0.467	1.533	0.304631	1	1	PP
224932_at	C22ORF16	chromosome 22 open reading frame 16	0.467	1.533	0.304631	1	1	PP
228196_s_at			0.467	1.533	0.304631	1	1	PP
236075_s_at	ZNF232*	zinc finger protein 232	0.467	1.533	0.304631	1	1	PP
238545_at	BRD7*	bromodomain containing 7	0.467	1.533	0.304631	1	1	PP
203119_at	CCDC86	coiled-coil domain containing 86	0.468	1.532	0.305483	1	1	PP
225716_at			0.468	1.532	0.305483	1	1	PP
1554633_a_at	MYT1L	myelin transcription factor 1-like	0.469	1.531	0.306336	0	1	P50
219412_at	RAB38	RAB38, member RAS oncogene family	0.469	1.531	0.306336	1	1	PP
1555446_s_at	TMEM1*	transmembrane protein 1	0.47	1.53	0.30719	1	1	PP
205264_at	CD3EAP	CD3e molecule, epsilon associated protein	0.47	1.53	0.30719	1	1	PP
213964_x_at	C10ORF95*	chromosome 10 open reading frame 95	0.47	1.53	0.30719	1	1	PP
201700_at	CCND3	cyclin D3	0.471	1.529	0.308044	1	1	PP
203417_at	MFAP2	microfibrillar-associated protein 2	0.471	1.529	0.308044	1	1	PP
218424_s_at	STEAP3*	STEAP family member 3	0.471	1.529	0.308044	1	1	PP
230766_at			0.471	1.529	0.308044	1	1	PP
1553685_s_at	SP1*	Sp1 transcription factor	0.472	1.528	0.308901	1	1	PP
226490_at	NHSL1	NHS-like 1	0.472	1.528	0.308901	1	1	PP
237110_at			0.473	1.527	0.309758	0	1	P50
213002_at	MARCKS (includes EG:4082)*	myristoylated alanine-rich protein kinase C substrate	0.475	1.525	0.311475	1	1	PP
208012_x_at	SP110*	SP110 nuclear body protein	0.477	1.523	0.313198	1	1	PP
228967_at	EIF1 (includes EG:10209)*	eukaryotic translation initiation factor 1	0.477	1.523	0.313198	1	1	PP
235505_s_at			0.478	1.522	0.31406	1	1	PP
232446_at	MGC45800	hypothetical protein LOC90768	0.479	1.521	0.314924	1	1	PP
235497_at	LOC284591*	hypothetical protein LOC643837	0.48	1.52	0.315789	0	1	P50
209761_s_at	SP110*	SP110 nuclear body protein	0.481	1.519	0.316656	1	1	PP
33323_r_at	SFN*	stratifin	0.481	1.519	0.316656	1	1	PP
204497_at	ADCY9	adenylate cyclase 9	0.482	1.518	0.317523	1	1	PP
222444_at	ARMCX3*	armadillo repeat containing, X-linked 3	0.482	1.518	0.317523	0	1	P50
226360_at	ZNRF3	zinc and ring finger 3	0.483	1.517	0.318392	1	1	PP
222760_at	ZNF703	zinc finger protein 703	0.484	1.516	0.319261	0	1	P50
236219_at			0.484	1.516	0.319261	1	1	PP
219735_s_at	TFCP2L1*	transcription factor CP2-like 1	0.486	1.514	0.321004	1	1	PP
202800_at	SLC1A3*	solute carrier family 1 (glial high affinity glutamate transporter), member 3	0.487	1.513	0.321877	1	1	PP
227530_at	AKAP12*	A kinase (PRKA) anchor protein (gravin) 12	0.487	1.513	0.321877	1	1	PP
201601_x_at	IFITM1*	interferon induced transmembrane protein 1 (9-27)	0.489	1.511	0.323627	0	1	P50
202746_at	ITM2A	integral membrane protein 2A	0.49	1.51	0.324503	0	1	P50
235350_at	C4ORF19*	chromosome 4 open reading frame 19	0.49	1.51	0.324503	0	1	P50
237097_at	SPTBN5	spectrin, beta, non-erythrocytic 5	0.49	1.51	0.324503	0	1	P50
238425_at	PSMB2*	proteasome (prosome, macropain) subunit, beta type, 2	0.491	1.509	0.325381	1	1	PP
202075_s_at	PLTP	phospholipid transfer protein	0.492	1.508	0.32626	1	1	PP
203626_s_at	SKP2*	S-phase kinase-associated protein 2 (p45)	0.492	1.508	0.32626	0	1	P50
204944_at	PTPRG	protein tyrosine phosphatase, receptor type, G	0.492	1.508	0.32626	0	1	P50
218459_at	TOR3A*	torsin family 3, member A	0.492	1.508	0.32626	1	1	PP
204495_s_at	C15ORF39*	chromosome 15 open reading frame 39	0.493	1.507	0.32714	1	1	PP
218486_at	KLF11*	Kruppel-like factor 11	0.494	1.506	0.328021	1	1	PP
232667_at			0.494	1.506	0.328021	1	1	PP
225167_at	FRMD4A*	FERM domain containing 4A	0.495	1.505	0.328904	1	1	PP
229544_at			0.495	1.505	0.328904	1	1	PP
212295_s_at	SLC7A1*	solute carrier family 7 (cationic amino acid transporter, y+ system), member 1	0.496	1.504	0.329787	1	1	PP
229873_at	KCTD21	potassium channel tetramerisation domain containing 21	0.496	1.504	0.329787	0	1	P50
236675_at	RPA1*	replication protein A1, 70kDa	0.496	1.504	0.329787	0	1	P50
58780_s_at	FLJ10357*	hypothetical protein FLJ10357	0.497	1.503	0.330672	1	1	PP
212509_s_at	MXRA7*	matrix-remodelling associated 7	0.498	1.502	0.331558	1	1	PP
229511_at	SMARCE1*	SWI/SNF related, matrix associated, actin dependent regulator of chromatin, subfamily e, member 1	0.498	1.502	0.331558	1	1	PP
236609_at	PMS1*	PMS1 postmeiotic segregation increased 1 (S. cerevisiae)	0.499	1.501	0.332445	0	1	P50
236646_at	C12ORF59	chromosome 12 open reading frame 59	0.499	1.501	0.332445	0	1	P50
239288_at	TNIK*	TRAF2 and NCK interacting kinase	0.499	1.501	0.332445	0	1	P50
203578_s_at	SLC7A6*	solute carrier family 7 (cationic amino acid transporter, y+ system), member 6	0.5	1.5	0.333333	1	1	PP
217525_at	OLFML1	olfactomedin-like 1	0.5	1.5	0.333333	1	1	PP
1554328_at	STXBP4*	syntaxin binding protein 4	0.503	1.497	0.336005	1	1	PP
226759_at	IKZF4*	IKAROS family zinc finger 4 (Eos)	0.503	1.497	0.336005	1	1	PP
213379_at	COQ2*	coenzyme Q2 homolog, prenyltransferase (yeast)	0.504	1.496	0.336898	1	1	PP
229958_at	CLN8*	ceroid-lipofuscinosis, neuronal 8 (epilepsy, progressive with mental retardation)	0.504	1.496	0.336898	0	1	P50
213803_at	KPNB1*	karyopherin (importin) beta 1	0.505	1.495	0.337793	1	1	PP
210253_at	HTATIP2*	HIV-1 Tat interactive protein 2, 30kDa	0.508	1.492	0.340483	1	1	PP
228522_at			0.508	1.492	0.340483	1	1	PP
241935_at	SHROOM1*	shroom family member 1	0.508	1.492	0.340483	0	1	P50
213634_s_at	TRMU	tRNA 5-methylaminomethyl-2-thiouridylate methyltransferase	0.509	1.491	0.341382	1	1	PP
219258_at	TIPIN	TIMELESS interacting protein	0.509	1.491	0.341382	1	1	PP
1554152_a_at	OGDH*	oxoglutarate (alpha-ketoglutarate) dehydrogenase (lipoamide)	0.51	1.49	0.342282	1	1	PP
1555733_s_at	AP1S3*	adaptor-related protein complex 1, sigma 3 subunit	0.51	1.49	0.342282	0	1	P50
205448_s_at	MAP3K12	mitogen-activated protein kinase kinase kinase 12	0.51	1.49	0.342282	0	1	P50
222026_at	RBM3*	RNA binding motif (RNP1, RRM) protein 3	0.51	1.49	0.342282	0	1	P50
244559_at	VPS52*	vacuolar protein sorting 52 homolog (S. cerevisiae)	0.51	1.49	0.342282	0	1	P50
204178_s_at	RBM14*	RNA binding motif protein 14	0.511	1.489	0.343183	1	1	PP
206604_at	OVOL1*	ovo-like 1(Drosophila)	0.511	1.489	0.343183	1	1	PP
228754_at	SLC6A6*	solute carrier family 6 (neurotransmitter transporter, taurine), member 6	0.511	1.489	0.343183	1	1	PP
236501_at	SALL4*	sal-like 4 (Drosophila)	0.511	1.489	0.343183	1	1	PP
201669_s_at	MARCKS (includes EG:4082)*	myristoylated alanine-rich protein kinase C substrate	0.512	1.488	0.344086	1	1	PP
222262_s_at	ETNK1*	ethanolamine kinase 1	0.512	1.488	0.344086	1	1	PP
1555731_a_at	AP1S3*	adaptor-related protein complex 1, sigma 3 subunit	0.513	1.487	0.34499	1	1	PP
218939_at	LETM1*	leucine zipper-EF-hand containing transmembrane protein 1	0.513	1.487	0.34499	1	1	PP
229197_at	ING5*	inhibitor of growth family, member 5	0.513	1.487	0.34499	1	1	PP
235346_at	FUNDC1	FUN14 domain containing 1	0.513	1.487	0.34499	1	1	PP
221958_s_at	GPR177*	G protein-coupled receptor 177	0.514	1.486	0.345895	1	1	PP
231034_s_at			0.514	1.486	0.345895	1	1	PP
244519_at	ASXL1*	additional sex combs like 1 (Drosophila)	0.514	1.486	0.345895	1	1	PP
1554217_a_at	CCDC132*	coiled-coil domain containing 132	0.515	1.485	0.346801	1	1	PP
219202_at	RHBDF2	rhomboid 5 homolog 2 (Drosophila)	0.515	1.485	0.346801	0	1	P50
238177_at	SLC6A19*	solute carrier family 6 (neutral amino acid transporter), member 19	0.515	1.485	0.346801	1	1	PP
203280_at	SAFB2*	scaffold attachment factor B2	0.516	1.484	0.347709	0	1	P50
225615_at	LOC126917*	hypothetical protein LOC126917	0.516	1.484	0.347709	0	1	P50
225861_at	C16ORF14*	chromosome 16 open reading frame 14	0.517	1.483	0.348618	1	1	PP
235803_at	CRLF3*	cytokine receptor-like factor 3	0.517	1.483	0.348618	1	1	PP
238183_at	PRKAR1B	protein kinase, cAMP-dependent, regulatory, type I, beta	0.517	1.483	0.348618	0	1	P50
213758_at	COX4I1*	cytochrome c oxidase subunit IV isoform 1	0.518	1.482	0.349528	1	1	PP
219006_at	C6ORF66	chromosome 6 open reading frame 66	0.519	1.481	0.350439	1	1	PP
223553_s_at	DOK3	docking protein 3	0.491	1.399	0.350965	0	1	P50
201421_s_at	WDR77*	WD repeat domain 77	0.52	1.48	0.351351	1	1	PP
226905_at	FAM101B*	family with sequence similarity 101, member B	0.52	1.48	0.351351	1	1	PP
213181_s_at	MOCS1*	molybdenum cofactor synthesis 1	0.521	1.479	0.352265	1	1	PP
214794_at	PA2G4*	proliferation-associated 2G4, 38kDa	0.521	1.479	0.352265	1	1	PP
216457_s_at	SF3A1*	splicing factor 3a, subunit 1, 120kDa	0.521	1.479	0.352265	1	1	PP
236613_at	RBM25*	RNA binding motif protein 25	0.521	1.479	0.352265	0	1	P50
237464_at	IMAA	SLC7A5 pseudogene	0.521	1.479	0.352265	1	1	PP
201670_s_at	MARCKS (includes EG:4082)*	myristoylated alanine-rich protein kinase C substrate	0.522	1.478	0.35318	1	1	PP
208791_at	CLU*	clusterin	0.522	1.478	0.35318	1	1	PP
215011_at	SNHG3	small nucleolar RNA host gene (non-protein coding) 3	0.522	1.478	0.35318	1	1	PP
229811_at			0.523	1.477	0.354096	0	1	P50
1560803_at	DNAH3*	dynein, axonemal, heavy chain 3	0.525	1.475	0.355932	1	1	PP
209567_at	RRS1	RRS1 ribosome biogenesis regulator homolog (S. cerevisiae)	0.525	1.475	0.355932	1	1	PP
215389_s_at	TNNT2	troponin T type 2 (cardiac)	0.525	1.475	0.355932	0	1	P50
235056_at	ETV6*	ets variant gene 6 (TEL oncogene)	0.525	1.475	0.355932	1	1	PP
241574_s_at	IGF2BP1*	insulin-like growth factor 2 mRNA binding protein 1	0.525	1.475	0.355932	0	1	P50
241710_at			0.525	1.475	0.355932	0	1	P50
202951_at	STK38*	serine/threonine kinase 38	0.526	1.474	0.356852	1	1	PP
202587_s_at	AK1	adenylate kinase 1	0.527	1.473	0.357773	1	1	PP
203737_s_at	PPRC1	peroxisome proliferator-activated receptor gamma, coactivator-related 1	0.527	1.473	0.357773	1	1	PP
228902_at			0.527	1.473	0.357773	0	1	P50
243256_at	MKNK1*	MAP kinase interacting serine/threonine kinase 1	0.527	1.473	0.357773	1	1	PP
218770_s_at	TMEM39B	transmembrane protein 39B	0.528	1.472	0.358696	1	1	PP
1552287_s_at	AFG3L1*	AFG3 ATPase family gene 3-like 1 (S. cerevisiae)	0.529	1.471	0.359619	1	1	PP
212543_at	AIM1	absent in melanoma 1	0.529	1.471	0.359619	1	1	PP
218935_at	EHD3	EH-domain containing 3	0.529	1.471	0.359619	0	1	P50
223774_at	C1ORF79*	chromosome 1 open reading frame 79	0.529	1.471	0.359619	0	1	P50
204769_s_at	TAP2*	transporter 2, ATP-binding cassette, sub-family B (MDR/TAP)	0.53	1.47	0.360544	0	1	P50
223258_s_at	KIAA1333*	KIAA1333	0.53	1.47	0.360544	0	1	P50
226481_at	VPRBP*	Vpr (HIV-1) binding protein	0.53	1.47	0.360544	1	1	PP
208433_s_at	LRP8*	low density lipoprotein receptor-related protein 8, apolipoprotein e receptor	0.531	1.469	0.36147	1	1	PP
218597_s_at	ZCD1	zinc finger, CDGSH-type domain 1	0.531	1.469	0.36147	1	1	PP
225168_at	FRMD4A*	FERM domain containing 4A	0.531	1.469	0.36147	0	1	P50
205966_at	TAF13	TAF13 RNA polymerase II, TATA box binding protein (TBP)-associated factor, 18kDa	0.532	1.468	0.362398	1	1	PP
213877_x_at	TCEB2*	transcription elongation factor B (SIII), polypeptide 2 (18kDa, elongin B)	0.532	1.468	0.362398	0	1	P50
205034_at	CCNE2 (includes EG:9134)*	cyclin E2	0.533	1.467	0.363327	1	1	PP
206307_s_at	FOXD1	forkhead box D1	0.534	1.466	0.364256	0	1	P50
219398_at	CIDEC*	cell death-inducing DFFA-like effector c	0.534	1.466	0.364256	0	1	P50
226166_x_at	STK36*	serine/threonine kinase 36, fused homolog (Drosophila)	0.534	1.466	0.364256	1	1	PP
231021_at	SLC6A19*	solute carrier family 6 (neutral amino acid transporter), member 19	0.534	1.466	0.364256	1	1	PP
1554478_a_at	HEATR3*	HEAT repeat containing 3	0.535	1.465	0.365188	1	1	PP
1555916_at	RPUSD3*	RNA pseudouridylate synthase domain containing 3	0.535	1.465	0.365188	1	1	PP
204696_s_at	CDC25A*	cell division cycle 25 homolog A (S. pombe)	0.535	1.465	0.365188	1	1	PP
225664_at	COL12A1*	collagen, type XII, alpha 1	0.536	1.464	0.36612	1	1	PP
201289_at	CYR61*	cysteine-rich, angiogenic inducer, 61	0.537	1.463	0.367054	1	1	PP
202792_s_at	SAPS2*	SAPS domain family, member 2	0.537	1.463	0.367054	0	1	P50
204588_s_at	SLC7A7	solute carrier family 7 (cationic amino acid transporter, y+ system), member 7	0.537	1.463	0.367054	1	1	PP
219017_at	ETNK1*	ethanolamine kinase 1	0.537	1.463	0.367054	1	1	PP
229049_at	LCMT1*	leucine carboxyl methyltransferase 1	0.537	1.463	0.367054	1	1	PP
223295_s_at	LUC7L*	LUC7-like (S. cerevisiae)	0.538	1.462	0.367989	1	1	PP
235371_at			0.538	1.462	0.367989	0	1	P50
235689_at	MTFMT	mitochondrial methionyl-tRNA formyltransferase	0.538	1.462	0.367989	1	1	PP
202663_at	WIPF1*	WAS/WASL interacting protein family, member 1	0.539	1.461	0.368925	0	1	P50
204518_s_at	PPIC*	peptidylprolyl isomerase C (cyclophilin C)	0.539	1.461	0.368925	0	1	P50
218893_at	ISOC2	isochorismatase domain containing 2	0.539	1.461	0.368925	1	1	PP
223773_s_at	C1ORF79*	chromosome 1 open reading frame 79	0.539	1.461	0.368925	1	1	PP
207357_s_at	GALNT10*	UDP-N-acetyl-alpha-D-galactosamine:polypeptide N-acetylgalactosaminyltransferase 10 (GalNAc-T10)	0.54	1.46	0.369863	1	1	PP
226876_at	FAM101B*	family with sequence similarity 101, member B	0.54	1.46	0.369863	1	1	PP
228642_at	HOXA2*	homeobox A2	0.543	1.457	0.372684	1	1	PP
236985_at	EIF4B*	eukaryotic translation initiation factor 4B	0.543	1.457	0.372684	1	1	PP
239492_at	SEC14L4	SEC14-like 4 (S. cerevisiae)	0.543	1.457	0.372684	1	1	PP
204317_at	GTSE1*	G-2 and S-phase expressed 1	0.544	1.456	0.373626	1	1	PP
231110_at	FABP3	fatty acid binding protein 3, muscle and heart (mammary-derived growth inhibitor)	0.544	1.456	0.373626	0	1	P50
238273_at	SLC13A4*	solute carrier family 13 (sodium/sulfate symporters), member 4	0.544	1.456	0.373626	0	1	P50
205521_at	ENDOGL1*	endonuclease G-like 1	0.545	1.455	0.37457	1	1	PP
209591_s_at	BMP7	bone morphogenetic protein 7 (osteogenic protein 1)	0.545	1.455	0.37457	0	1	P50
213385_at	CHN2*	chimerin (chimaerin) 2	0.545	1.455	0.37457	1	1	PP
213574_s_at	KPNB1*	karyopherin (importin) beta 1	0.545	1.455	0.37457	1	1	PP
223150_s_at	PTPN23	protein tyrosine phosphatase, non-receptor type 23	0.545	1.455	0.37457	1	1	PP
231182_at	WIPF1*	WAS/WASL interacting protein family, member 1	0.545	1.455	0.37457	0	1	P50
232051_at	CCDC102A*	coiled-coil domain containing 102A	0.545	1.455	0.37457	0	1	P50
210764_s_at	CYR61*	cysteine-rich, angiogenic inducer, 61	0.546	1.454	0.375516	1	1	PP
212654_at	TPM2*	tropomyosin 2 (beta)	0.546	1.454	0.375516	1	1	PP
219093_at	PID1 (includes EG:55022)	phosphotyrosine interaction domain containing 1	0.546	1.454	0.375516	0	1	P50
220143_x_at	LUC7L*	LUC7-like (S. cerevisiae)	0.546	1.454	0.375516	0	1	P50
220265_at	GPR107*	G protein-coupled receptor 107	0.547	1.453	0.376462	1	1	PP
1553715_s_at	C16ORF14*	chromosome 16 open reading frame 14	0.549	1.451	0.37836	0	1	P50
210002_at	GATA6*	GATA binding protein 6	0.549	1.451	0.37836	1	1	PP
200889_s_at	SSR1*	signal sequence receptor, alpha (translocon-associated protein alpha)	0.55	1.45	0.37931	1	1	PP
205282_at	LRP8*	low density lipoprotein receptor-related protein 8, apolipoprotein e receptor	0.55	1.45	0.37931	1	1	PP
1556283_s_at	FGFR1OP2*	FGFR1 oncogene partner 2	0.551	1.449	0.380262	1	1	PP
203639_s_at	FGFR2*	fibroblast growth factor receptor 2 (bacteria-expressed kinase, keratinocyte growth factor receptor, craniofacial dysostosis 1, Crouzon syndrome, Pfeiffer syndrome, Jackson-Weiss syndrome)	0.551	1.449	0.380262	1	1	PP
213316_at	KIAA1462*	KIAA1462	0.551	1.449	0.380262	1	1	PP
214729_at	TWISTNB*	TWIST neighbor	0.551	1.449	0.380262	0	1	P50
218857_s_at	ASRGL1	asparaginase like 1	0.551	1.449	0.380262	0	1	P50
222109_at	GNL3L (includes EG:54552)*	guanine nucleotide binding protein-like 3 (nucleolar)-like	0.551	1.449	0.380262	1	1	PP
239973_at			0.551	1.449	0.380262	1	1	PP
217856_at	RBM8A*	RNA binding motif protein 8A	0.552	1.448	0.381215	1	1	PP
242260_at	MATR3*	matrin 3	0.552	1.448	0.381215	1	1	PP
1555953_at	COL18A1	collagen, type XVIII, alpha 1	0.553	1.447	0.38217	0	1	P50
224927_at	KIAA1949	KIAA1949	0.553	1.447	0.38217	0	1	P50
244669_at	SNHG5*	small nucleolar RNA host gene (non-protein coding) 5	0.553	1.447	0.38217	1	1	PP
202613_at	CTPS	CTP synthase	0.554	1.446	0.383126	1	1	PP
230376_at	GCNT3*	glucosaminyl (N-acetyl) transferase 3, mucin type	0.554	1.446	0.383126	1	1	PP
232079_s_at	PVRL2*	poliovirus receptor-related 2 (herpesvirus entry mediator B)	0.554	1.446	0.383126	1	1	PP
211297_s_at	CDK7	cyclin-dependent kinase 7 (MO15 homolog, Xenopus laevis, cdk-activating kinase)	0.556	1.444	0.385042	1	1	PP
212379_at	GART*	phosphoribosylglycinamide formyltransferase, phosphoribosylglycinamide synthetase, phosphoribosylaminoimidazole synthetase	0.556	1.444	0.385042	1	1	PP
228710_at			0.556	1.444	0.385042	1	1	PP
233028_at	C10ORF119*	chromosome 10 open reading frame 119	0.556	1.444	0.385042	0	1	P50
235551_at	WDR4*	WD repeat domain 4	0.556	1.444	0.385042	1	1	PP
1552712_a_at	NMNAT2*	nicotinamide nucleotide adenylyltransferase 2	0.557	1.443	0.386001	0	1	P50
223564_s_at	GNB1L*	guanine nucleotide binding protein (G protein), beta polypeptide 1-like	0.557	1.443	0.386001	1	1	PP
204279_at	PSMB9	proteasome (prosome, macropain) subunit, beta type, 9 (large multifunctional peptidase 2)	0.518	1.341	0.386279	0	1	P50
213213_at	DIDO1*	death inducer-obliterator 1	0.558	1.442	0.386963	1	1	PP
226570_at	ATP1B3*	ATPase, Na+/K+ transporting, beta 3 polypeptide	0.558	1.442	0.386963	0	1	P50
229418_at			0.558	1.442	0.386963	0	1	P50
38158_at	ESPL1*	extra spindle pole bodies homolog 1 (S. cerevisiae)	0.558	1.442	0.386963	1	1	PP
211401_s_at	FGFR2*	fibroblast growth factor receptor 2 (bacteria-expressed kinase, keratinocyte growth factor receptor, craniofacial dysostosis 1, Crouzon syndrome, Pfeiffer syndrome, Jackson-Weiss syndrome)	0.56	1.44	0.388889	1	1	PP
214696_at	MGC14376	hypothetical protein MGC14376	0.56	1.44	0.388889	1	1	PP
219933_at	GLRX2	glutaredoxin 2	0.56	1.44	0.388889	1	1	PP
227335_at	DIDO1*	death inducer-obliterator 1	0.56	1.44	0.388889	1	1	PP
234068_s_at	AP2A1*	adaptor-related protein complex 2, alpha 1 subunit	0.56	1.44	0.388889	1	1	PP
1554890_a_at	TIA1*	TIA1 cytotoxic granule-associated RNA binding protein	0.561	1.439	0.389854	0	1	P50
1556284_at	PPA2*	pyrophosphatase (inorganic) 2	0.561	1.439	0.389854	0	1	P50
200907_s_at	PALLD*	palladin, cytoskeletal associated protein	0.562	1.438	0.390821	1	1	PP
210381_s_at	CCKBR*	cholecystokinin B receptor	0.562	1.438	0.390821	1	1	PP
214022_s_at	IFITM1*	interferon induced transmembrane protein 1 (9-27)	0.562	1.438	0.390821	1	1	PP
220139_at	DNMT3L	DNA (cytosine-5-)-methyltransferase 3-like	0.562	1.438	0.390821	1	1	PP
229713_at	PIP5K2A*	phosphatidylinositol-4-phosphate 5-kinase, type II, alpha	0.562	1.438	0.390821	1	1	PP
1564413_at	FLJ36116	hypothetical locus LOC388666	0.563	1.437	0.391788	1	1	PP
207056_s_at	SLC4A8*	solute carrier family 4, sodium bicarbonate cotransporter, member 8	0.563	1.437	0.391788	1	1	PP
226912_at	ZDHHC23	zinc finger, DHHC-type containing 23	0.563	1.437	0.391788	0	1	P50
229666_s_at	CSTF3*	cleavage stimulation factor, 3' pre-RNA, subunit 3, 77kDa	0.563	1.437	0.391788	1	1	PP
203023_at	HSPC111*	hypothetical protein HSPC111	0.564	1.436	0.392758	1	1	PP
211419_s_at	CHN2*	chimerin (chimaerin) 2	0.564	1.436	0.392758	1	1	PP
216511_s_at	TCF7L2*	transcription factor 7-like 2 (T-cell specific, HMG-box)	0.564	1.436	0.392758	1	1	PP
221643_s_at	RERE*	arginine-glutamic acid dipeptide (RE) repeats	0.564	1.436	0.392758	0	1	P50
239711_at	ADAL	adenosine deaminase-like	0.564	1.436	0.392758	0	1	P50
208153_s_at	FAT2	FAT tumor suppressor homolog 2 (Drosophila)	0.565	1.435	0.393728	1	1	PP
212092_at	PEG10*	paternally expressed 10	0.565	1.435	0.393728	1	1	PP
213594_x_at	FUSIP1*	FUS interacting protein (serine/arginine-rich) 1	0.565	1.435	0.393728	1	1	PP
218127_at	NFYB*	nuclear transcription factor Y, beta	0.565	1.435	0.393728	1	1	PP
218866_s_at	POLR3K	polymerase (RNA) III (DNA directed) polypeptide K, 12.3 kDa	0.565	1.435	0.393728	1	1	PP
222877_at	NRP2*	neuropilin 2	0.565	1.435	0.393728	0	1	P50
231806_s_at	STK36*	serine/threonine kinase 36, fused homolog (Drosophila)	0.565	1.435	0.393728	1	1	PP
225806_at	JUB*	jub, ajuba homolog (Xenopus laevis)	0.566	1.434	0.3947	1	1	PP
202541_at	SCYE1*	small inducible cytokine subfamily E, member 1 (endothelial monocyte-activating)	0.567	1.433	0.395673	1	1	PP
210139_s_at	PMP22	peripheral myelin protein 22	0.567	1.433	0.395673	1	1	PP
219345_at	BOLA1	bolA homolog 1 (E. coli)	0.567	1.433	0.395673	0	1	P50
225373_at	C10ORF54	chromosome 10 open reading frame 54	0.567	1.433	0.395673	1	1	PP
1553691_at	B3GALNT2*	beta-1,3-N-acetylgalactosaminyltransferase 2	0.568	1.432	0.396648	0	1	P50
1559190_s_at	RDH13*	retinol dehydrogenase 13 (all-trans/9-cis)	0.569	1.431	0.397624	1	1	PP
1565717_s_at	FUS*	fusion (involved in t(12;16) in malignant liposarcoma)	0.569	1.431	0.397624	1	1	PP
216913_s_at	RRP12*	ribosomal RNA processing 12 homolog (S. cerevisiae)	0.569	1.431	0.397624	1	1	PP
212791_at	C1ORF216	chromosome 1 open reading frame 216	0.57	1.43	0.398601	1	1	PP
217208_s_at	DLG1*	discs, large homolog 1 (Drosophila)	0.57	1.43	0.398601	1	1	PP
226916_x_at	DPP9	dipeptidyl-peptidase 9	0.57	1.43	0.398601	0	1	P50
206302_s_at	NUDT4*	nudix (nucleoside diphosphate linked moiety X)-type motif 4	0.571	1.429	0.39958	1	1	PP
212786_at	CLEC16A	KIAA0350	0.571	1.429	0.39958	1	1	PP
218574_s_at	LMCD1	LIM and cysteine-rich domains 1	0.571	1.429	0.39958	0	1	P50
1557677_a_at	TRIML1	tripartite motif family-like 1	0.572	1.428	0.40056	1	1	PP
209691_s_at	DOK4*	docking protein 4	0.572	1.428	0.40056	1	1	PP
213326_at	VAMP1*	vesicle-associated membrane protein 1 (synaptobrevin 1)	0.572	1.428	0.40056	1	1	PP
221637_s_at	C11ORF48*	chromosome 11 open reading frame 48	0.572	1.428	0.40056	1	1	PP
230921_s_at			0.572	1.428	0.40056	1	1	PP
1553639_a_at	PPARGC1B	peroxisome proliferator-activated receptor gamma, coactivator 1 beta	0.573	1.427	0.401542	1	1	PP
201747_s_at	SAFB*	scaffold attachment factor B	0.573	1.427	0.401542	1	1	PP
202206_at	ARL4C*	ADP-ribosylation factor-like 4C	0.573	1.427	0.401542	1	1	PP
202693_s_at	STK17A*	serine/threonine kinase 17a	0.573	1.427	0.401542	1	1	PP
225467_s_at	RDH13*	retinol dehydrogenase 13 (all-trans/9-cis)	0.573	1.427	0.401542	1	1	PP
239888_at			0.573	1.427	0.401542	1	1	PP
243431_at	BTBD14A*	BTB (POZ) domain containing 14A	0.574	1.426	0.402525	1	1	PP
74694_s_at	RABEP2*	rabaptin, RAB GTPase binding effector protein 2	0.574	1.426	0.402525	1	1	PP
201516_at	SRM	spermidine synthase	0.575	1.425	0.403509	1	1	PP
208952_s_at	LARP5*	La ribonucleoprotein domain family, member 5	0.575	1.425	0.403509	1	1	PP
228746_s_at	CDV3*	CDV3 homolog (mouse)	0.575	1.425	0.403509	1	1	PP
1554016_a_at	C16ORF57*	chromosome 16 open reading frame 57	0.576	1.424	0.404494	1	1	PP
1555772_a_at	CDC25A*	cell division cycle 25 homolog A (S. pombe)	0.576	1.424	0.404494	1	1	PP
216035_x_at	TCF7L2*	transcription factor 7-like 2 (T-cell specific, HMG-box)	0.576	1.424	0.404494	1	1	PP
219037_at	RRP15*	ribosomal RNA processing 15 homolog (S. cerevisiae)	0.576	1.424	0.404494	1	1	PP
222513_s_at	SORBS1	sorbin and SH3 domain containing 1	0.576	1.424	0.404494	0	1	P50
224433_s_at	DDX54*	DEAD (Asp-Glu-Ala-Asp) box polypeptide 54	0.576	1.424	0.404494	0	1	P50
239435_x_at	SHROOM1*	shroom family member 1	0.576	1.424	0.404494	1	1	PP
226248_s_at	KIAA1324	KIAA1324	0.577	1.423	0.405481	0	1	P50
227455_at	C6ORF136*	chromosome 6 open reading frame 136	0.577	1.423	0.405481	1	1	PP
227456_s_at	C6ORF136*	chromosome 6 open reading frame 136	0.577	1.423	0.405481	1	1	PP
239058_at	FOXC2	forkhead box C2 (MFH-1, mesenchyme forkhead 1)	0.577	1.423	0.405481	0	1	P50
201235_s_at	BTG2*	BTG family, member 2	0.578	1.422	0.40647	0	1	P50
209176_at			0.578	1.422	0.40647	0	1	P50
217655_at	FXYD5*	FXYD domain containing ion transport regulator 5	0.578	1.422	0.40647	0	1	P50
224181_at	C18ORF2*	chromosome 18 open reading frame 2	0.578	1.422	0.40647	0	1	P50
240449_at	ZNF341	zinc finger protein 341	0.578	1.422	0.40647	1	1	PP
1555870_at	RNF207*	ring finger protein 207	0.579	1.421	0.40746	1	1	PP
220494_s_at			0.579	1.421	0.40746	1	1	PP
222343_at	BCL2L11*	BCL2-like 11 (apoptosis facilitator)	0.579	1.421	0.40746	1	1	PP
228359_at	STS-1*	Cbl-interacting protein Sts-1	0.58	1.42	0.408451	0	1	P50
212407_at	KIAA0859*	KIAA0859	0.581	1.419	0.409443	1	1	PP
221510_s_at	GLS*	glutaminase	0.581	1.419	0.409443	1	1	PP
228298_at	FAM113B	family with sequence similarity 113, member B	0.581	1.419	0.409443	0	1	P50
214251_s_at	NUMA1*	nuclear mitotic apparatus protein 1	0.582	1.418	0.410437	1	1	PP
223907_s_at	PINX1	PIN2-interacting protein 1	0.582	1.418	0.410437	1	1	PP
234653_at			0.582	1.418	0.410437	1	1	PP
236721_at	ALKBH1*	alkB, alkylation repair homolog 1 (E. coli)	0.582	1.418	0.410437	1	1	PP
1554776_at	ZFP42*	zinc finger protein 42 homolog (mouse)	0.583	1.417	0.411433	1	1	PP
206303_s_at	NUDT4*	nudix (nucleoside diphosphate linked moiety X)-type motif 4	0.583	1.417	0.411433	1	1	PP
210842_at	NRP2*	neuropilin 2	0.583	1.417	0.411433	1	1	PP
213986_s_at	C19ORF6*	chromosome 19 open reading frame 6	0.583	1.417	0.411433	0	1	P50
1566403_at	SNORA68*	small nucleolar RNA, H/ACA box 68	0.584	1.416	0.412429	1	1	PP
202385_s_at	TCOF1 (includes EG:6949)*	Treacher Collins-Franceschetti syndrome 1	0.584	1.416	0.412429	1	1	PP
212430_at	RBM38	RNA binding motif protein 38	0.584	1.416	0.412429	1	1	PP
1554329_x_at	STXBP4*	syntaxin binding protein 4	0.585	1.415	0.413428	0	1	P50
213069_at	HEG1	HEG homolog 1 (zebrafish)	0.585	1.415	0.413428	0	1	P50
226815_at	C3ORF31*	chromosome 3 open reading frame 31	0.585	1.415	0.413428	0	1	P50
227326_at	MXRA7*	matrix-remodelling associated 7	0.585	1.415	0.413428	1	1	PP
50221_at	TFEB*	transcription factor EB	0.585	1.415	0.413428	1	1	PP
203419_at	MLL4	myeloid/lymphoid or mixed-lineage leukemia 4	0.586	1.414	0.414427	0	1	P50
203925_at	GCLM	glutamate-cysteine ligase, modifier subunit	0.586	1.414	0.414427	1	1	PP
204817_at	ESPL1*	extra spindle pole bodies homolog 1 (S. cerevisiae)	0.586	1.414	0.414427	1	1	PP
213888_s_at	TRAF3IP3*	TRAF3 interacting protein 3	0.586	1.414	0.414427	0	1	P50
225954_s_at	MIDN	midnolin	0.586	1.414	0.414427	1	1	PP
213090_s_at	TAF4	TAF4 RNA polymerase II, TATA box binding protein (TBP)-associated factor, 135kDa	0.587	1.413	0.415428	1	1	PP
215705_at	PPP5C*	protein phosphatase 5, catalytic subunit	0.587	1.413	0.415428	0	1	P50
219924_s_at	ZMYM6*	zinc finger, MYM-type 6	0.587	1.413	0.415428	0	1	P50
225897_at			0.587	1.413	0.415428	0	1	P50
236023_at			0.587	1.413	0.415428	0	1	P50
204133_at	RRP9	RRP9, small subunit (SSU) processome component, homolog (yeast)	0.588	1.412	0.416431	1	1	PP
213536_s_at	UBE2I*	ubiquitin-conjugating enzyme E2I (UBC9 homolog, yeast)	0.588	1.412	0.416431	0	1	P50
223339_at	ATPIF1*	ATPase inhibitory factor 1	0.588	1.412	0.416431	1	1	PP
206129_s_at	ARSB*	arylsulfatase B	0.589	1.411	0.417434	1	1	PP
217859_s_at	SLC39A9*	solute carrier family 39 (zinc transporter), member 9	0.589	1.411	0.417434	1	1	PP
218103_at	FTSJ3	FtsJ homolog 3 (E. coli)	0.589	1.411	0.417434	1	1	PP
229883_at	GRIN2D	glutamate receptor, ionotropic, N-methyl D-aspartate 2D	0.589	1.411	0.417434	1	1	PP
232078_at	PVRL2*	poliovirus receptor-related 2 (herpesvirus entry mediator B)	0.589	1.411	0.417434	1	1	PP
232873_at	ZNF33A*	zinc finger protein 33A	0.589	1.411	0.417434	1	1	PP
32091_at	SLC25A44*	solute carrier family 25, member 44	0.589	1.411	0.417434	1	1	PP
1556579_s_at	IGSF10	immunoglobulin superfamily, member 10	0.59	1.41	0.41844	1	1	PP
212703_at	TLN2*	talin 2	0.59	1.41	0.41844	1	1	PP
1555734_x_at	AP1S3*	adaptor-related protein complex 1, sigma 3 subunit	0.591	1.409	0.419446	1	1	PP
218566_s_at	CHORDC1*	cysteine and histidine-rich domain (CHORD)-containing 1	0.591	1.409	0.419446	1	1	PP
219340_s_at	CLN8*	ceroid-lipofuscinosis, neuronal 8 (epilepsy, progressive with mental retardation)	0.591	1.409	0.419446	1	1	PP
227962_at	ACOX1*	acyl-Coenzyme A oxidase 1, palmitoyl	0.591	1.409	0.419446	1	1	PP
47560_at	LPHN1	latrophilin 1	0.591	1.409	0.419446	0	1	P50
213848_at			0.592	1.408	0.420455	1	1	PP
214277_at	COX11*	COX11 homolog, cytochrome c oxidase assembly protein (yeast)	0.592	1.408	0.420455	0	1	P50
215236_s_at	PICALM*	phosphatidylinositol binding clathrin assembly protein	0.592	1.408	0.420455	1	1	PP
217996_at	PHLDA1*	pleckstrin homology-like domain, family A, member 1	0.592	1.408	0.420455	1	1	PP
227466_at	LOC285550*	hypothetical protein LOC285550	0.592	1.408	0.420455	1	1	PP
229689_s_at	DLG5*	discs, large homolog 5 (Drosophila)	0.592	1.408	0.420455	1	1	PP
229748_x_at	LOC285458*	similar to hypothetical protein MGC27019	0.592	1.408	0.420455	1	1	PP
242140_at			0.592	1.408	0.420455	1	1	PP
200906_s_at	PALLD*	palladin, cytoskeletal associated protein	0.593	1.407	0.421464	1	1	PP
223225_s_at	SEH1L*	SEH1-like (S. cerevisiae)	0.593	1.407	0.421464	1	1	PP
200897_s_at	PALLD*	palladin, cytoskeletal associated protein	0.594	1.406	0.422475	1	1	PP
204363_at	F3	coagulation factor III (thromboplastin, tissue factor)	0.594	1.406	0.422475	1	1	PP
217907_at	MRPL18	mitochondrial ribosomal protein L18	0.594	1.406	0.422475	1	1	PP
218330_s_at	NAV2 (includes EG:89797)*	neuron navigator 2	0.594	1.406	0.422475	1	1	PP
208937_s_at	ID1	inhibitor of DNA binding 1, dominant negative helix-loop-helix protein	0.595	1.405	0.423488	1	1	PP
209762_x_at	SP110*	SP110 nuclear body protein	0.595	1.405	0.423488	1	1	PP
212203_x_at	IFITM3	interferon induced transmembrane protein 3 (1-8U)	0.595	1.405	0.423488	0	1	P50
238299_at	LASS5*	LAG1 homolog, ceramide synthase 5	0.595	1.405	0.423488	1	1	PP
200987_x_at	PSME3*	proteasome (prosome, macropain) activator subunit 3 (PA28 gamma; Ki)	0.596	1.404	0.424501	1	1	PP
212009_s_at	STIP1*	stress-induced-phosphoprotein 1 (Hsp70/Hsp90-organizing protein)	0.596	1.404	0.424501	1	1	PP
213927_at	MAP3K9*	mitogen-activated protein kinase kinase kinase 9	0.596	1.404	0.424501	1	1	PP
218692_at	FLJ20366	hypothetical protein FLJ20366	0.596	1.404	0.424501	0	1	P50
227481_at	CNKSR3	CNKSR family member 3	0.596	1.404	0.424501	1	1	PP
232164_s_at	EPPK1*	epiplakin 1	0.596	1.404	0.424501	1	1	PP
205710_at	LRP2	low density lipoprotein-related protein 2	0.597	1.403	0.425517	1	1	PP
208086_s_at	DMD*	dystrophin (muscular dystrophy, Duchenne and Becker types)	0.597	1.403	0.425517	0	1	P50
209713_s_at	SLC35D1*	solute carrier family 35 (UDP-glucuronic acid/UDP-N-acetylgalactosamine dual transporter), member D1	0.597	1.403	0.425517	1	1	PP
212083_at	TEX261*	testis expressed 261	0.597	1.403	0.425517	1	1	PP
222471_s_at	KCMF1*	potassium channel modulatory factor 1	0.597	1.403	0.425517	1	1	PP
202220_at	KIAA0907*	KIAA0907	0.598	1.402	0.426534	1	1	PP
203944_x_at	BTN2A1	butyrophilin, subfamily 2, member A1	0.598	1.402	0.426534	0	1	P50
204971_at	CSTA	cystatin A (stefin A)	0.598	1.402	0.426534	1	1	PP
236118_at			0.598	1.402	0.426534	1	1	PP
1553764_a_at	JUB*	jub, ajuba homolog (Xenopus laevis)	0.599	1.401	0.427552	1	1	PP
202275_at	G6PD	glucose-6-phosphate dehydrogenase	0.599	1.401	0.427552	1	1	PP
209180_at	RABGGTB*	Rab geranylgeranyltransferase, beta subunit	0.599	1.401	0.427552	1	1	PP
228287_at	ING5*	inhibitor of growth family, member 5	0.599	1.401	0.427552	1	1	PP
228990_at	C1ORF79*	chromosome 1 open reading frame 79	0.599	1.401	0.427552	1	1	PP
217811_at	SELT*	selenoprotein T	0.6	1.4	0.428571	1	1	PP
227270_at	LOC285550*	hypothetical protein LOC285550	0.6	1.4	0.428571	1	1	PP
229523_at			0.6	1.4	0.428571	1	1	PP
235333_at	B4GALT6*	UDP-Gal:betaGlcNAc beta 1,4- galactosyltransferase, polypeptide 6	0.6	1.4	0.428571	0	1	P50
200684_s_at	UBE2L3*	ubiquitin-conjugating enzyme E2L 3	0.601	1.399	0.429593	1	1	PP
205398_s_at	SMAD3*	SMAD family member 3	0.601	1.399	0.429593	0	1	P50
205829_at	HSD17B1*	hydroxysteroid (17-beta) dehydrogenase 1	0.601	1.399	0.429593	1	1	PP
208792_s_at	CLU*	clusterin	0.601	1.399	0.429593	1	1	PP
210978_s_at	TAGLN2*	transgelin 2	0.601	1.399	0.429593	1	1	PP
215464_s_at	TAX1BP3*	Tax1 (human T-cell leukemia virus type I) binding protein 3	0.601	1.399	0.429593	1	1	PP
201938_at	CDK2AP1	CDK2-associated protein 1	0.602	1.398	0.430615	1	1	PP
204529_s_at	TOX	thymocyte selection-associated high mobility group box	0.602	1.398	0.430615	1	1	PP
206357_at	OPA3*	optic atrophy 3 (autosomal recessive, with chorea and spastic paraplegia)	0.602	1.398	0.430615	1	1	PP
228613_at	RAB11FIP3*	RAB11 family interacting protein 3 (class II)	0.602	1.398	0.430615	1	1	PP
242417_at	LOC283278	hypothetical protein LOC283278	0.602	1.398	0.430615	1	1	PP
242753_x_at	C4ORF16*	chromosome 4 open reading frame 16	0.602	1.398	0.430615	0	1	P50
243529_at	mtrnas2	methionyl-tRNA synthetase 2, mitochondrial	0.602	1.398	0.430615	1	1	PP
204537_s_at	GABRE	gamma-aminobutyric acid (GABA) A receptor, epsilon	0.603	1.397	0.431639	0	1	P50
207233_s_at	MITF*	microphthalmia-associated transcription factor	0.603	1.397	0.431639	1	1	PP
207876_s_at	FLNC	filamin C, gamma (actin binding protein 280)	0.603	1.397	0.431639	0	1	P50
227330_x_at	LOC285458*	similar to hypothetical protein MGC27019	0.603	1.397	0.431639	1	1	PP
1561849_at	PKD1L2*	polycystic kidney disease 1-like 2	0.604	1.396	0.432665	1	1	PP
201490_s_at	PPIF*	peptidylprolyl isomerase F (cyclophilin F)	0.604	1.396	0.432665	1	1	PP
203394_s_at	HES1*	hairy and enhancer of split 1, (Drosophila)	0.604	1.396	0.432665	0	1	P50
223473_at	FKSG24	hypothetical protein MGC12972	0.604	1.396	0.432665	1	1	PP
223484_at	C15ORF48	chromosome 15 open reading frame 48	0.604	1.396	0.432665	1	1	PP
239208_s_at	C21ORF57*	chromosome 21 open reading frame 57	0.604	1.396	0.432665	1	1	PP
242427_at	WAC*	WW domain containing adaptor with coiled-coil	0.604	1.396	0.432665	1	1	PP
201206_s_at	RRBP1*	ribosome binding protein 1 homolog 180kDa (dog)	0.605	1.395	0.433692	1	1	PP
201908_at	DVL3*	dishevelled, dsh homolog 3 (Drosophila)	0.605	1.395	0.433692	1	1	PP
209193_at	PIM1	pim-1 oncogene	0.605	1.395	0.433692	1	1	PP
220601_at	C16ORF70*	chromosome 16 open reading frame 70	0.605	1.395	0.433692	0	1	P50
205691_at	SYNGR3	synaptogyrin 3	0.606	1.394	0.43472	1	1	PP
50376_at	ZNF444	zinc finger protein 444	0.606	1.394	0.43472	1	1	PP
209773_s_at	RRM2*	ribonucleotide reductase M2 polypeptide	0.607	1.393	0.43575	1	1	PP
210026_s_at	CARD10	caspase recruitment domain family, member 10	0.607	1.393	0.43575	1	1	PP
213534_s_at	PASK*	PAS domain containing serine/threonine kinase	0.607	1.393	0.43575	1	1	PP
229490_s_at			0.607	1.393	0.43575	1	1	PP
231777_at	CSNK2B*	casein kinase 2, beta polypeptide	0.607	1.393	0.43575	0	1	P50
242058_at			0.607	1.393	0.43575	0	1	P50
204165_at	WASF1	WAS protein family, member 1	0.608	1.392	0.436782	1	1	PP
204200_s_at	PDGFB*	platelet-derived growth factor beta polypeptide (simian sarcoma viral (v-sis) oncogene homolog)	0.608	1.392	0.436782	0	1	P50
227500_at			0.608	1.392	0.436782	0	1	P50
232165_at	EPPK1*	epiplakin 1	0.608	1.392	0.436782	1	1	PP
1552364_s_at	MSI2*	musashi homolog 2 (Drosophila)	0.609	1.391	0.437815	1	1	PP
1554659_at	NEK4*	NIMA (never in mitosis gene a)-related kinase 4	0.609	1.391	0.437815	0	1	P50
203506_s_at	MED12*	mediator of RNA polymerase II transcription, subunit 12 homolog (S. cerevisiae)	0.609	1.391	0.437815	1	1	PP
204484_at	PIK3C2B	phosphoinositide-3-kinase, class 2, beta polypeptide	0.609	1.391	0.437815	1	1	PP
209599_s_at	PRUNE*	prune homolog (Drosophila)	0.609	1.391	0.437815	0	1	P50
210503_at	MAGEA11	melanoma antigen family A, 11	0.609	1.391	0.437815	1	1	PP
211104_s_at	MYO7A*	myosin VIIA	0.609	1.391	0.437815	0	1	P50
213838_at	NOL7*	nucleolar protein 7, 27kDa	0.609	1.391	0.437815	1	1	PP
219246_s_at	OGFOD2*	2-oxoglutarate and iron-dependent oxygenase domain containing 2	0.609	1.391	0.437815	0	1	P50
203184_at	FBN2 (includes EG:2201)	fibrillin 2 (congenital contractural arachnodactyly)	0.61	1.39	0.438849	1	1	PP
212556_at	SCRIB	scribbled homolog (Drosophila)	0.61	1.39	0.438849	1	1	PP
218681_s_at	SDF2L1	stromal cell-derived factor 2-like 1	0.61	1.39	0.438849	1	1	PP
219281_at	MSRA	methionine sulfoxide reductase A	0.61	1.39	0.438849	1	1	PP
222531_s_at	C14ORF108*	chromosome 14 open reading frame 108	0.61	1.39	0.438849	1	1	PP
226082_s_at	SFRS15*	splicing factor, arginine/serine-rich 15	0.61	1.39	0.438849	1	1	PP
227160_s_at	C20ORF7*	chromosome 20 open reading frame 7	0.61	1.39	0.438849	1	1	PP
228834_at	TOB1*	transducer of ERBB2, 1	0.61	1.39	0.438849	1	1	PP
215223_s_at	SOD2*	superoxide dismutase 2, mitochondrial	0.611	1.389	0.439885	1	1	PP
225050_at	ZNF512	zinc finger protein 512	0.612	1.388	0.440922	1	1	PP
240721_at	KIAA1967*	KIAA1967	0.612	1.388	0.440922	0	1	P50
204364_s_at	REEP1*	receptor accessory protein 1	0.613	1.387	0.441961	1	1	PP
204575_s_at	MMP19	matrix metallopeptidase 19	0.613	1.387	0.441961	1	1	PP
206472_s_at	TLE3*	transducin-like enhancer of split 3 (E(sp1) homolog, Drosophila)	0.613	1.387	0.441961	1	1	PP
208476_s_at	FRMD4A*	FERM domain containing 4A	0.613	1.387	0.441961	0	1	P50
211573_x_at	TGM2*	transglutaminase 2 (C polypeptide, protein-glutamine-gamma-glutamyltransferase)	0.613	1.387	0.441961	1	1	PP
213286_at	ZFR*	zinc finger RNA binding protein	0.613	1.387	0.441961	0	1	P50
219990_at	E2F8	E2F transcription factor 8	0.613	1.387	0.441961	1	1	PP
228930_at	SCARNA15	small Cajal body-specific RNA 15	0.613	1.387	0.441961	1	1	PP
202645_s_at	MEN1	multiple endocrine neoplasia I	0.614	1.386	0.443001	1	1	PP
209853_s_at	PSME3*	proteasome (prosome, macropain) activator subunit 3 (PA28 gamma; Ki)	0.614	1.386	0.443001	1	1	PP
213757_at	EIF5A*	eukaryotic translation initiation factor 5A	0.614	1.386	0.443001	1	1	PP
214336_s_at	COPA*	coatomer protein complex, subunit alpha	0.614	1.386	0.443001	1	1	PP
216037_x_at	TCF7L2*	transcription factor 7-like 2 (T-cell specific, HMG-box)	0.614	1.386	0.443001	1	1	PP
218358_at	CRELD2	cysteine-rich with EGF-like domains 2	0.614	1.386	0.443001	1	1	PP
226076_s_at	MBD6*	methyl-CpG binding domain protein 6	0.614	1.386	0.443001	1	1	PP
227850_x_at	CDC42EP5	CDC42 effector protein (Rho GTPase binding) 5	0.614	1.386	0.443001	1	1	PP
1569552_at	PTPN18*	protein tyrosine phosphatase, non-receptor type 18 (brain-derived)	0.615	1.385	0.444043	1	1	PP
201315_x_at	IFITM2	interferon induced transmembrane protein 2 (1-8D)	0.615	1.385	0.444043	1	1	PP
210105_s_at	FYN	FYN oncogene related to SRC, FGR, YES	0.615	1.385	0.444043	1	1	PP
212987_at	FBXO9*	F-box protein 9	0.615	1.385	0.444043	1	1	PP
224870_at	KIAA0114	KIAA0114	0.615	1.385	0.444043	1	1	PP
226077_at	RNF145*	ring finger protein 145	0.615	1.385	0.444043	1	1	PP
226234_at			0.55	1.236	0.444984	0	1	P50
205555_s_at	MSX2*	msh homeobox 2	0.616	1.384	0.445087	1	1	PP
228559_at	CENPN (includes EG:55839)*	centromere protein N	0.616	1.384	0.445087	1	1	PP
201585_s_at	SFPQ*	splicing factor proline/glutamine-rich (polypyrimidine tract binding protein associated)	0.617	1.383	0.446132	1	1	PP
209427_at	SMTN*	smoothelin	0.617	1.383	0.446132	1	1	PP
224252_s_at	FXYD5*	FXYD domain containing ion transport regulator 5	0.617	1.383	0.446132	1	1	PP
1554049_s_at	WDR42A*	WD repeat domain 42A	0.618	1.382	0.447178	0	1	P50
201491_at	AHSA1	AHA1, activator of heat shock 90kDa protein ATPase homolog 1 (yeast)	0.618	1.382	0.447178	1	1	PP
215535_s_at	AGPAT1*	1-acylglycerol-3-phosphate O-acyltransferase 1 (lysophosphatidic acid acyltransferase, alpha)	0.618	1.382	0.447178	1	1	PP
221538_s_at	PLXNA1*	plexin A1	0.618	1.382	0.447178	1	1	PP
227516_at	SF3A1*	splicing factor 3a, subunit 1, 120kDa	0.618	1.382	0.447178	1	1	PP
231396_s_at	FAM126A*	family with sequence similarity 126, member A	0.498	1.113	0.447439	0	1	P50
1555943_at	PGAM5	phosphoglycerate mutase family member 5	0.619	1.381	0.448226	0	1	P50
205010_at	GNL3L (includes EG:54552)*	guanine nucleotide binding protein-like 3 (nucleolar)-like	0.619	1.381	0.448226	1	1	PP
209722_s_at	SERPINB9*	serpin peptidase inhibitor, clade B (ovalbumin), member 9	0.619	1.381	0.448226	1	1	PP
219129_s_at	SAP30L	SAP30-like	0.619	1.381	0.448226	1	1	PP
219341_at	CLN8*	ceroid-lipofuscinosis, neuronal 8 (epilepsy, progressive with mental retardation)	0.619	1.381	0.448226	0	1	P50
225298_at	PNKD*	paroxysmal nonkinesigenic dyskinesia	0.619	1.381	0.448226	1	1	PP
228175_at			0.619	1.381	0.448226	1	1	PP
228365_at	CPNE8	copine VIII	0.619	1.381	0.448226	0	1	P50
32099_at	SAFB2*	scaffold attachment factor B2	0.619	1.381	0.448226	1	1	PP
1561942_x_at			0.62	1.38	0.449275	0	1	P50
209365_s_at	ECM1	extracellular matrix protein 1	0.62	1.38	0.449275	1	1	PP
221730_at	COL5A2*	collagen, type V, alpha 2	0.62	1.38	0.449275	1	1	PP
222642_s_at	TMEM33*	transmembrane protein 33	0.62	1.38	0.449275	1	1	PP
224470_at	SEC22C*	SEC22 vesicle trafficking protein homolog C (S. cerevisiae)	0.62	1.38	0.449275	1	1	PP
224773_at	NAV1*	neuron navigator 1	0.62	1.38	0.449275	1	1	PP
227642_at	TFCP2L1*	transcription factor CP2-like 1	0.62	1.38	0.449275	1	1	PP
235559_at	FLJ22374*	hypothetical protein FLJ22374	0.62	1.38	0.449275	1	1	PP
1554026_a_at	MYO10*	myosin X	0.621	1.379	0.450326	1	1	PP
203110_at	PTK2B	PTK2B protein tyrosine kinase 2 beta	0.621	1.379	0.450326	0	1	P50
210202_s_at	BIN1*	bridging integrator 1	0.621	1.379	0.450326	1	1	PP
216841_s_at	SOD2*	superoxide dismutase 2, mitochondrial	0.621	1.379	0.450326	1	1	PP
222894_x_at	C20ORF7*	chromosome 20 open reading frame 7	0.621	1.379	0.450326	1	1	PP
226602_s_at	BCR*	breakpoint cluster region	0.621	1.379	0.450326	1	1	PP
205293_x_at	BAIAP2*	BAI1-associated protein 2	0.622	1.378	0.451379	0	1	P50
212070_at	GPR56*	G protein-coupled receptor 56	0.622	1.378	0.451379	1	1	PP
212497_at	C14ORF32*	chromosome 14 open reading frame 32	0.622	1.378	0.451379	1	1	PP
214011_s_at	HSPC111*	hypothetical protein HSPC111	0.622	1.378	0.451379	1	1	PP
220136_s_at	CRYBA2	crystallin, beta A2	0.622	1.378	0.451379	1	1	PP
225252_at	SRXN1	sulfiredoxin 1 homolog (S. cerevisiae)	0.622	1.378	0.451379	1	1	PP
225882_at	SLC35B4*	solute carrier family 35, member B4	0.622	1.378	0.451379	1	1	PP
229200_at			0.622	1.378	0.451379	1	1	PP
230960_at	PUNC*	putative neuronal cell adhesion molecule	0.622	1.378	0.451379	1	1	PP
204513_s_at	ELMO1	engulfment and cell motility 1	0.623	1.377	0.452433	1	1	PP
209044_x_at	SF3B4	splicing factor 3b, subunit 4, 49kDa	0.623	1.377	0.452433	1	1	PP
216945_x_at	PASK*	PAS domain containing serine/threonine kinase	0.623	1.377	0.452433	0	1	P50
219288_at	C3ORF14*	chromosome 3 open reading frame 14	0.623	1.377	0.452433	1	1	PP
1555974_a_at	FLJ39051*	hypothetical gene supported by AK096370	0.624	1.376	0.453488	1	1	PP
202793_at	MBOAT5*	membrane bound O-acyltransferase domain containing 5	0.624	1.376	0.453488	1	1	PP
203643_at	ERF	Ets2 repressor factor	0.624	1.376	0.453488	1	1	PP
221908_at	TMEM118*	transmembrane protein 118	0.624	1.376	0.453488	0	1	P50
227019_at			0.624	1.376	0.453488	0	1	P50
242683_at			0.624	1.376	0.453488	0	1	P50
201224_s_at	SRRM1*	serine/arginine repetitive matrix 1	0.625	1.375	0.454545	1	1	PP
202297_s_at	RER1*	RER1 retention in endoplasmic reticulum 1 homolog (S. cerevisiae)	0.625	1.375	0.454545	1	1	PP
212316_at	NUP210*	nucleoporin 210kDa	0.625	1.375	0.454545	1	1	PP
214964_at	KIAA1856*	KIAA1856 protein	0.625	1.375	0.454545	0	1	P50
219869_s_at	SLC39A8*	solute carrier family 39 (zinc transporter), member 8	0.625	1.375	0.454545	1	1	PP
221480_at	HNRPD*	heterogeneous nuclear ribonucleoprotein D (AU-rich element RNA binding protein 1, 37kDa)	0.625	1.375	0.454545	1	1	PP
226156_at			0.625	1.375	0.454545	1	1	PP
226245_at	KCTD1*	potassium channel tetramerisation domain containing 1	0.625	1.375	0.454545	1	1	PP
228443_s_at			0.625	1.375	0.454545	1	1	PP
1556029_s_at	NMNAT2*	nicotinamide nucleotide adenylyltransferase 2	0.626	1.374	0.455604	1	1	PP
1558794_at			0.626	1.374	0.455604	0	1	P50
204839_at	POP5	processing of precursor 5, ribonuclease P/MRP subunit (S. cerevisiae)	0.626	1.374	0.455604	1	1	PP
213707_s_at	DLX5	distal-less homeobox 5	0.626	1.374	0.455604	1	1	PP
227907_at	TP53BP1	tumor protein p53 binding protein, 1	0.626	1.374	0.455604	0	1	P50
229276_at	IGSF9	immunoglobulin superfamily, member 9	0.626	1.374	0.455604	0	1	P50
243579_at	MSI2*	musashi homolog 2 (Drosophila)	0.626	1.374	0.455604	1	1	PP
200699_at	KDELR2*	KDEL (Lys-Asp-Glu-Leu) endoplasmic reticulum protein retention receptor 2	0.627	1.373	0.456664	1	1	PP
204514_at	DPH2	DPH2 homolog (S. cerevisiae)	0.627	1.373	0.456664	1	1	PP
214975_s_at	MTMR1*	myotubularin related protein 1	0.627	1.373	0.456664	1	1	PP
229146_at	C7ORF31	chromosome 7 open reading frame 31	0.627	1.373	0.456664	1	1	PP
229371_at	SLC20A2	solute carrier family 20 (phosphate transporter), member 2	0.627	1.373	0.456664	0	1	P50
200644_at	MARCKSL1	MARCKS-like 1	0.628	1.372	0.457726	1	1	PP
200825_s_at	HYOU1	hypoxia up-regulated 1	0.628	1.372	0.457726	1	1	PP
209488_s_at	RBPMS*	RNA binding protein with multiple splicing	0.628	1.372	0.457726	1	1	PP
225973_at	TAP2*	transporter 2, ATP-binding cassette, sub-family B (MDR/TAP)	0.628	1.372	0.457726	1	1	PP
226477_at	VPRBP*	Vpr (HIV-1) binding protein	0.628	1.372	0.457726	0	1	P50
1556301_at			0.629	1.371	0.458789	0	1	P50
201680_x_at	ARS2*	ARS2 protein	0.629	1.371	0.458789	1	1	PP
202724_s_at	FOXO1	forkhead box O1	0.629	1.371	0.458789	1	1	PP
205347_s_at	TMSL8	thymosin-like 8	0.629	1.371	0.458789	1	1	PP
209457_at	DUSP5	dual specificity phosphatase 5	0.629	1.371	0.458789	1	1	PP
212563_at	BOP1*	block of proliferation 1	0.629	1.371	0.458789	1	1	PP
1553551_s_at			0.63	1.37	0.459854	1	1	PP
201196_s_at	AMD1*	adenosylmethionine decarboxylase 1	0.63	1.37	0.459854	1	1	PP
206949_s_at	RUSC1	RUN and SH3 domain containing 1	0.63	1.37	0.459854	1	1	PP
214157_at	GNAS*	GNAS complex locus	0.63	1.37	0.459854	1	1	PP
219868_s_at	ANKFY1*	ankyrin repeat and FYVE domain containing 1	0.63	1.37	0.459854	1	1	PP
209528_s_at	TELO2*	TEL2, telomere maintenance 2, homolog (S. cerevisiae)	0.631	1.369	0.46092	1	1	PP
212769_at	TLE3*	transducin-like enhancer of split 3 (E(sp1) homolog, Drosophila)	0.631	1.369	0.46092	1	1	PP
212787_at	YLPM1*	YLP motif containing 1	0.631	1.369	0.46092	1	1	PP
213573_at			0.631	1.369	0.46092	1	1	PP
218139_s_at	C14ORF108*	chromosome 14 open reading frame 108	0.631	1.369	0.46092	1	1	PP
221989_at	RPL10*	ribosomal protein L10	0.631	1.369	0.46092	1	1	PP
224185_at	TP53*	tumor protein p53 (Li-Fraumeni syndrome)	0.631	1.369	0.46092	1	1	PP
236507_at	ZDHHC3*	zinc finger, DHHC-type containing 3	0.631	1.369	0.46092	0	1	P50
235833_at	PPAT*	phosphoribosyl pyrophosphate amidotransferase	0.609	1.32	0.461364	1	1	PP
205084_at	BCAP29*	B-cell receptor-associated protein 29	0.632	1.368	0.461988	1	1	PP
209006_s_at	C1ORF63*	chromosome 1 open reading frame 63	0.632	1.368	0.461988	1	1	PP
1554095_at	RBM33*	RNA binding motif protein 33	0.633	1.367	0.463058	1	1	PP
1564121_at	ABR*	active BCR-related gene	0.633	1.367	0.463058	1	1	PP
202384_s_at	TCOF1 (includes EG:6949)*	Treacher Collins-Franceschetti syndrome 1	0.633	1.367	0.463058	1	1	PP
209706_at	NKX3-1	NK3 homeobox 1	0.633	1.367	0.463058	1	1	PP
225012_at	HDLBP*	high density lipoprotein binding protein (vigilin)	0.633	1.367	0.463058	1	1	PP
226895_at	NFIC	nuclear factor I/C (CCAAT-binding transcription factor)	0.633	1.367	0.463058	1	1	PP
227937_at	LOC339344	hypothetical protein LOC339344	0.633	1.367	0.463058	1	1	PP
229665_at	CSTF3*	cleavage stimulation factor, 3' pre-RNA, subunit 3, 77kDa	0.633	1.367	0.463058	1	1	PP
1554114_s_at	SSH2*	slingshot homolog 2 (Drosophila)	0.635	1.365	0.465201	1	1	PP
1559600_at	HIC2*	hypermethylated in cancer 2	0.635	1.365	0.465201	1	1	PP
203068_at	KLHL21	kelch-like 21 (Drosophila)	0.635	1.365	0.465201	1	1	PP
207524_at	ST7*	suppression of tumorigenicity 7	0.635	1.365	0.465201	1	1	PP
208744_x_at	HSPH1*	heat shock 105kDa/110kDa protein 1	0.635	1.365	0.465201	1	1	PP
219842_at	ARL15	ADP-ribosylation factor-like 15	0.635	1.365	0.465201	1	1	PP
225879_at	TSEN54*	tRNA splicing endonuclease 54 homolog (S. cerevisiae)	0.635	1.365	0.465201	1	1	PP
227964_at	FKSG44	FKSG44 gene	0.635	1.365	0.465201	1	1	PP
242131_at			0.635	1.365	0.465201	1	1	PP
1554096_a_at	RBM33*	RNA binding motif protein 33	0.636	1.364	0.466276	1	1	PP
201243_s_at	ATP1B1*	ATPase, Na+/K+ transporting, beta 1 polypeptide	0.636	1.364	0.466276	1	1	PP
205163_at	MYLPF	fast skeletal myosin light chain 2	0.636	1.364	0.466276	1	1	PP
219746_at	DPF3*	D4, zinc and double PHD fingers, family 3	0.636	1.364	0.466276	1	1	PP
244641_at	C7ORF30*	chromosome 7 open reading frame 30	0.636	1.364	0.466276	1	1	PP
1554743_x_at	PMS1*	PMS1 postmeiotic segregation increased 1 (S. cerevisiae)	0.637	1.363	0.467351	0	1	P50
200878_at	EPAS1*	endothelial PAS domain protein 1	0.637	1.363	0.467351	1	1	PP
202307_s_at	TAP1	transporter 1, ATP-binding cassette, sub-family B (MDR/TAP)	0.637	1.363	0.467351	1	1	PP
206140_at	LHX2 (includes EG:9355)	LIM homeobox 2	0.637	1.363	0.467351	1	1	PP
209016_s_at	KRT7*	keratin 7	0.637	1.363	0.467351	1	1	PP
212993_at			0.637	1.363	0.467351	1	1	PP
213492_at	COL2A1	collagen, type II, alpha 1 (primary osteoarthritis, spondyloepiphyseal dysplasia, congenital)	0.637	1.363	0.467351	1	1	PP
220289_s_at	AIM1L	absent in melanoma 1-like	0.637	1.363	0.467351	1	1	PP
223414_s_at	LYAR*	Ly1 antibody reactive homolog (mouse)	0.637	1.363	0.467351	1	1	PP
226224_at	WDR45L*	WDR45-like	0.637	1.363	0.467351	1	1	PP
226691_at	KIAA1856*	KIAA1856 protein	0.637	1.363	0.467351	1	1	PP
229661_at	SALL4*	sal-like 4 (Drosophila)	0.637	1.363	0.467351	1	1	PP
202715_at	CAD	carbamoyl-phosphate synthetase 2, aspartate transcarbamylase, and dihydroorotase	0.638	1.362	0.468429	1	1	PP
213606_s_at	ARHGDIA*	Rho GDP dissociation inhibitor (GDI) alpha	0.638	1.362	0.468429	1	1	PP
217853_at	TNS3*	tensin 3	0.638	1.362	0.468429	1	1	PP
226239_at	TMEM150	transmembrane protein 150	0.638	1.362	0.468429	1	1	PP
235707_at	LOC221710*	hypothetical protein LOC221710	0.638	1.362	0.468429	1	1	PP
241640_at	BCAP29*	B-cell receptor-associated protein 29	0.638	1.362	0.468429	0	1	P50
205037_at	RABL4	RAB, member of RAS oncogene family-like 4	0.639	1.361	0.469508	1	1	PP
206243_at	TIMP4	TIMP metallopeptidase inhibitor 4	0.639	1.361	0.469508	1	1	PP
207629_s_at	ARHGEF2*	rho/rac guanine nucleotide exchange factor (GEF) 2	0.639	1.361	0.469508	0	1	P50
213360_s_at	POM121*	POM121 membrane glycoprotein (rat)	0.639	1.361	0.469508	1	1	PP
223312_at	C2ORF7	chromosome 2 open reading frame 7	0.639	1.361	0.469508	1	1	PP
227896_at	BCCIP*	BRCA2 and CDKN1A interacting protein	0.639	1.361	0.469508	1	1	PP
228244_at			0.639	1.361	0.469508	1	1	PP
1558766_at	ARF3*	ADP-ribosylation factor 3	0.64	1.36	0.470588	0	1	P50
206038_s_at	NR2C2*	nuclear receptor subfamily 2, group C, member 2	0.64	1.36	0.470588	1	1	PP
208354_s_at	SLC12A3*	solute carrier family 12 (sodium/chloride transporters), member 3	0.64	1.36	0.470588	0	1	P50
216071_x_at	MED12*	mediator of RNA polymerase II transcription, subunit 12 homolog (S. cerevisiae)	0.64	1.36	0.470588	1	1	PP
217645_at	C14ORF112*	chromosome 14 open reading frame 112	0.64	1.36	0.470588	1	1	PP
218670_at	PUS1	pseudouridylate synthase 1	0.64	1.36	0.470588	1	1	PP
221436_s_at	CDCA3*	cell division cycle associated 3	0.64	1.36	0.470588	1	1	PP
234471_s_at	NCOA5*	nuclear receptor coactivator 5	0.64	1.36	0.470588	0	1	P50
235757_at	C10ORF18*	chromosome 10 open reading frame 18	0.64	1.36	0.470588	1	1	PP
237489_at			0.64	1.36	0.470588	1	1	PP
203893_at	TAF9*	TAF9 RNA polymerase II, TATA box binding protein (TBP)-associated factor, 32kDa	0.641	1.359	0.47167	1	1	PP
206801_at	NPPB	natriuretic peptide precursor B	0.641	1.359	0.47167	1	1	PP
219449_s_at	TMEM70*	transmembrane protein 70	0.641	1.359	0.47167	1	1	PP
220264_s_at	GPR107*	G protein-coupled receptor 107	0.641	1.359	0.47167	0	1	P50
222006_at	LETM1*	leucine zipper-EF-hand containing transmembrane protein 1	0.641	1.359	0.47167	1	1	PP
224376_s_at	C20ORF24*	chromosome 20 open reading frame 24	0.641	1.359	0.47167	1	1	PP
1556082_a_at			0.642	1.358	0.472754	1	1	PP
201850_at	CAPG	capping protein (actin filament), gelsolin-like	0.642	1.358	0.472754	0	1	P50
208953_at	LARP5*	La ribonucleoprotein domain family, member 5	0.642	1.358	0.472754	1	1	PP
215942_s_at	GTSE1*	G-2 and S-phase expressed 1	0.642	1.358	0.472754	1	1	PP
220797_at	METT10D*	methyltransferase 10 domain containing	0.642	1.358	0.472754	0	1	P50
224982_at	AKT1S1*	AKT1 substrate 1 (proline-rich)	0.642	1.358	0.472754	1	1	PP
243010_at	MSI2*	musashi homolog 2 (Drosophila)	0.642	1.358	0.472754	1	1	PP
244523_at	MMD*	monocyte to macrophage differentiation-associated	0.642	1.358	0.472754	1	1	PP
1552937_s_at	TREX1 (includes EG:11277)	three prime repair exonuclease 1	0.643	1.357	0.473839	1	1	PP
1557051_s_at	HOXA2*	homeobox A2	0.643	1.357	0.473839	1	1	PP
1558508_a_at	C1ORF53	chromosome 1 open reading frame 53	0.643	1.357	0.473839	1	1	PP
201742_x_at	SFRS1*	splicing factor, arginine/serine-rich 1 (splicing factor 2, alternate splicing factor)	0.643	1.357	0.473839	1	1	PP
207630_s_at	CREM*	cAMP responsive element modulator	0.643	1.357	0.473839	1	1	PP
213587_s_at	ATP6V0E2	ATPase, H+ transporting V0 subunit e2	0.643	1.357	0.473839	1	1	PP
214761_at	ZNF423	zinc finger protein 423	0.643	1.357	0.473839	1	1	PP
223223_at	ARV1	ARV1 homolog (S. cerevisiae)	0.643	1.357	0.473839	1	1	PP
224774_s_at	NAV1*	neuron navigator 1	0.643	1.357	0.473839	1	1	PP
228625_at	CITED4	Cbp/p300-interacting transactivator, with Glu/Asp-rich carboxy-terminal domain, 4	0.643	1.357	0.473839	1	1	PP
230906_at	GALNT10*	UDP-N-acetyl-alpha-D-galactosamine:polypeptide N-acetylgalactosaminyltransferase 10 (GalNAc-T10)	0.643	1.357	0.473839	1	1	PP
238495_at	SNAP23*	synaptosomal-associated protein, 23kDa	0.643	1.357	0.473839	0	1	P50
211485_s_at	FGF18*	fibroblast growth factor 18	0.644	1.356	0.474926	0	1	P50
224368_s_at	NDRG3*	NDRG family member 3	0.644	1.356	0.474926	1	1	PP
235099_at	CMTM8*	CKLF-like MARVEL transmembrane domain containing 8	0.644	1.356	0.474926	1	1	PP
238797_at	TRIM11*	tripartite motif-containing 11	0.644	1.356	0.474926	1	1	PP
241321_at	ANKRD23*	ankyrin repeat domain 23	0.644	1.356	0.474926	1	1	PP
1558211_s_at	SRC	v-src sarcoma (Schmidt-Ruppin A-2) viral oncogene homolog (avian)	0.645	1.355	0.476015	0	1	P50
1558775_s_at	NSMAF*	neutral sphingomyelinase (N-SMase) activation associated factor	0.645	1.355	0.476015	0	1	P50
209714_s_at	CDKN3*	cyclin-dependent kinase inhibitor 3 (CDK2-associated dual specificity phosphatase)	0.645	1.355	0.476015	1	1	PP
212235_at	PLXND1*	plexin D1	0.645	1.355	0.476015	0	1	P50
213272_s_at	TMEM159	transmembrane protein 159	0.645	1.355	0.476015	0	1	P50
219000_s_at	DCC1	defective in sister chromatid cohesion homolog 1 (S. cerevisiae)	0.645	1.355	0.476015	1	1	PP
221890_at	ZNF335*	zinc finger protein 335	0.645	1.355	0.476015	0	1	P50
226338_at	TMEM55A	transmembrane protein 55A	0.645	1.355	0.476015	0	1	P50
1553993_s_at	MED25	mediator of RNA polymerase II transcription, subunit 25 homolog (S. cerevisiae)	0.646	1.354	0.477105	1	1	PP
204367_at	SP2*	Sp2 transcription factor	0.646	1.354	0.477105	1	1	PP
205633_s_at	ALAS1	aminolevulinate, delta-, synthase 1	0.646	1.354	0.477105	1	1	PP
235783_at			0.646	1.354	0.477105	1	1	PP
201822_at	TIMM17A*	translocase of inner mitochondrial membrane 17 homolog A (yeast)	0.647	1.353	0.478197	0	1	P50
203061_s_at	MDC1*	mediator of DNA damage checkpoint 1	0.647	1.353	0.478197	1	1	PP
204594_s_at	SMCR7L*	Smith-Magenis syndrome chromosome region, candidate 7-like	0.647	1.353	0.478197	1	1	PP
209265_s_at	METTL3*	methyltransferase like 3	0.647	1.353	0.478197	1	1	PP
214439_x_at	BIN1*	bridging integrator 1	0.647	1.353	0.478197	1	1	PP
217025_s_at	DBN1*	drebrin 1	0.647	1.353	0.478197	1	1	PP
218477_at	TMEM14A	transmembrane protein 14A	0.647	1.353	0.478197	1	1	PP
221690_s_at	NLRP2	NLR family, pyrin domain containing 2	0.647	1.353	0.478197	1	1	PP
222703_s_at	YRDC*	yrdC domain containing (E. coli)	0.647	1.353	0.478197	1	1	PP
226032_at	CASP2*	caspase 2, apoptosis-related cysteine peptidase (neural precursor cell expressed, developmentally down-regulated 2)	0.647	1.353	0.478197	1	1	PP
227587_at	KRI1*	hypothetical protein FLJ12949	0.647	1.353	0.478197	1	1	PP
228395_at	GLT8D1*	glycosyltransferase 8 domain containing 1	0.647	1.353	0.478197	1	1	PP
1562966_at	KIAA1217*	KIAA1217	0.648	1.352	0.47929	1	1	PP
1570198_x_at	BST2	bone marrow stromal cell antigen 2	0.648	1.352	0.47929	0	1	P50
228022_at			0.585	1.22	0.479508	0	1	P50
1563796_s_at	EARS2*	glutamyl-tRNA synthetase 2, mitochondrial (putative)	0.649	1.351	0.480385	1	1	PP
201697_s_at	DNMT1*	DNA (cytosine-5-)-methyltransferase 1	0.649	1.351	0.480385	1	1	PP
212456_at	KIAA0664	KIAA0664	0.649	1.351	0.480385	1	1	PP
222047_s_at	ARS2*	ARS2 protein	0.649	1.351	0.480385	1	1	PP
201681_s_at	DLG5*	discs, large homolog 5 (Drosophila)	0.65	1.35	0.481481	1	1	PP
213852_at	RBM8A*	RNA binding motif protein 8A	0.65	1.35	0.481481	1	1	PP
214427_at	NOL1	nucleolar protein 1, 120kDa	0.65	1.35	0.481481	1	1	PP
215269_at	TMEM1*	transmembrane protein 1	0.65	1.35	0.481481	1	1	PP
225703_at	KIAA1545*	KIAA1545 protein	0.65	1.35	0.481481	1	1	PP
226485_at			0.65	1.35	0.481481	1	1	PP
228082_at	ASAM	adipocyte-specific adhesion molecule	0.65	1.35	0.481481	1	1	PP
228238_at	GAS5*	growth arrest-specific 5	0.65	1.35	0.481481	1	1	PP
239068_at	LOC285831*	hypothetical protein LOC285831	0.65	1.35	0.481481	1	1	PP
215728_s_at	ACOT7*	acyl-CoA thioesterase 7	0.651	1.349	0.48258	1	1	PP
218084_x_at	FXYD5*	FXYD domain containing ion transport regulator 5	0.651	1.349	0.48258	1	1	PP
229538_s_at	IQGAP3	IQ motif containing GTPase activating protein 3	0.651	1.349	0.48258	1	1	PP
231714_s_at	AP4B1	adaptor-related protein complex 4, beta 1 subunit	0.651	1.349	0.48258	1	1	PP
235542_at	HCG 40738	hypothetical protein MGC22014	0.651	1.349	0.48258	1	1	PP
32836_at	AGPAT1*	1-acylglycerol-3-phosphate O-acyltransferase 1 (lysophosphatidic acid acyltransferase, alpha)	0.651	1.349	0.48258	1	1	PP
204365_s_at	REEP1*	receptor accessory protein 1	0.652	1.348	0.48368	1	1	PP
205115_s_at	RBM19	RNA binding motif protein 19	0.652	1.348	0.48368	1	1	PP
209183_s_at	C10ORF10*	chromosome 10 open reading frame 10	0.652	1.348	0.48368	1	1	PP
219137_s_at	C2ORF33*	chromosome 2 open reading frame 33	0.652	1.348	0.48368	1	1	PP
222339_x_at	NFIX	nuclear factor I/X (CCAAT-binding transcription factor)	0.652	1.348	0.48368	0	1	P50
227207_x_at	ZNF213	zinc finger protein 213	0.652	1.348	0.48368	1	1	PP
227559_at			0.652	1.348	0.48368	1	1	PP
232781_at			0.652	1.348	0.48368	1	1	PP
1554696_s_at	TYMS*	thymidylate synthetase	0.653	1.347	0.484781	1	1	PP
201356_at	SF3A1*	splicing factor 3a, subunit 1, 120kDa	0.653	1.347	0.484781	1	1	PP
203163_at	KATNB1*	katanin p80 (WD repeat containing) subunit B 1	0.653	1.347	0.484781	1	1	PP
203252_at	CDK2AP2	CDK2-associated protein 2	0.653	1.347	0.484781	1	1	PP
204318_s_at	GTSE1*	G-2 and S-phase expressed 1	0.653	1.347	0.484781	1	1	PP
207008_at	IL8RB	interleukin 8 receptor, beta	0.653	1.347	0.484781	1	1	PP
210469_at	DLG5*	discs, large homolog 5 (Drosophila)	0.653	1.347	0.484781	1	1	PP
213333_at	MDH2*	malate dehydrogenase 2, NAD (mitochondrial)	0.653	1.347	0.484781	1	1	PP
214007_s_at	TWF1*	twinfilin, actin-binding protein, homolog 1 (Drosophila)	0.653	1.347	0.484781	1	1	PP
224991_at	CMIP*	c-Maf-inducing protein	0.653	1.347	0.484781	1	1	PP
227484_at			0.653	1.347	0.484781	0	1	P50
227806_at	C16ORF74*	chromosome 16 open reading frame 74	0.653	1.347	0.484781	0	1	P50
227921_at			0.653	1.347	0.484781	1	1	PP
238762_at	MTHFD2L*	methylenetetrahydrofolate dehydrogenase (NADP+ dependent) 2-like	0.653	1.347	0.484781	1	1	PP
241950_at	WWC1*	WW and C2 domain containing 1	0.653	1.347	0.484781	1	1	PP
1555225_at	C1ORF43*	chromosome 1 open reading frame 43	0.654	1.346	0.485884	1	1	PP
1558292_s_at	PIGW	phosphatidylinositol glycan anchor biosynthesis, class W	0.654	1.346	0.485884	1	1	PP
1568763_s_at	PDCD6*	programmed cell death 6	0.654	1.346	0.485884	1	1	PP
202474_s_at	HCFC1*	host cell factor C1 (VP16-accessory protein)	0.654	1.346	0.485884	1	1	PP
211804_s_at	CDK2*	cyclin-dependent kinase 2	0.654	1.346	0.485884	1	1	PP
212378_at	GART*	phosphoribosylglycinamide formyltransferase, phosphoribosylglycinamide synthetase, phosphoribosylaminoimidazole synthetase	0.654	1.346	0.485884	1	1	PP
226075_at	SPSB1*	splA/ryanodine receptor domain and SOCS box containing 1	0.654	1.346	0.485884	1	1	PP
226476_s_at	VPRBP*	Vpr (HIV-1) binding protein	0.654	1.346	0.485884	1	1	PP
228885_at	MAMDC2	MAM domain containing 2	0.654	1.346	0.485884	0	1	P50
231892_at	C9ORF100*	chromosome 9 open reading frame 100	0.654	1.346	0.485884	1	1	PP
235685_at			0.654	1.346	0.485884	1	1	PP
1554777_at	ZFP42*	zinc finger protein 42 homolog (mouse)	0.655	1.345	0.486989	1	1	PP
1566509_s_at	FBXO9*	F-box protein 9	0.655	1.345	0.486989	1	1	PP
200730_s_at	PTP4A1*	protein tyrosine phosphatase type IVA, member 1	0.655	1.345	0.486989	1	1	PP
202251_at	PRPF3	PRP3 pre-mRNA processing factor 3 homolog (S. cerevisiae)	0.655	1.345	0.486989	1	1	PP
203740_at	MPHOSPH6*	M-phase phosphoprotein 6	0.655	1.345	0.486989	1	1	PP
204883_s_at	HUS1*	HUS1 checkpoint homolog (S. pombe)	0.655	1.345	0.486989	0	1	P50
208712_at	CCND1*	cyclin D1	0.655	1.345	0.486989	1	1	PP
209182_s_at	C10ORF10*	chromosome 10 open reading frame 10	0.655	1.345	0.486989	1	1	PP
209487_at	RBPMS*	RNA binding protein with multiple splicing	0.655	1.345	0.486989	1	1	PP
212098_at	LOC151162	hypothetical protein LOC151162	0.655	1.345	0.486989	1	1	PP
216397_s_at	BOP1*	block of proliferation 1	0.655	1.345	0.486989	0	1	P50
238539_at	HPS3*	Hermansky-Pudlak syndrome 3	0.655	1.345	0.486989	1	1	PP
1554029_a_at	KIAA0372*	KIAA0372	0.655	1.342	0.488077	0	1	P50
205120_s_at	SGCB*	sarcoglycan, beta (43kDa dystrophin-associated glycoprotein)	0.656	1.344	0.488095	1	1	PP
207390_s_at	SMTN*	smoothelin	0.656	1.344	0.488095	1	1	PP
211966_at	COL4A2*	collagen, type IV, alpha 2	0.656	1.344	0.488095	1	1	PP
212178_s_at	POM121*	POM121 membrane glycoprotein (rat)	0.656	1.344	0.488095	1	1	PP
214086_s_at	PARP2*	poly (ADP-ribose) polymerase family, member 2	0.656	1.344	0.488095	1	1	PP
225189_s_at	RAPH1*	Ras association (RalGDS/AF-6) and pleckstrin homology domains 1	0.656	1.344	0.488095	1	1	PP
1552516_a_at	HIPK1*	homeodomain interacting protein kinase 1	0.657	1.343	0.489203	0	1	P50
1565254_s_at	MLL*	myeloid/lymphoid or mixed-lineage leukemia (trithorax homolog, Drosophila)	0.657	1.343	0.489203	0	1	P50
202446_s_at	PLSCR1*	phospholipid scramblase 1	0.657	1.343	0.489203	1	1	PP
206284_x_at	CLTB*	clathrin, light chain (Lcb)	0.657	1.343	0.489203	1	1	PP
215130_s_at	IQCK (includes EG:124152)*	IQ motif containing K	0.657	1.343	0.489203	0	1	P50
239085_at	JDP2*	jun dimerization protein 2	0.657	1.343	0.489203	1	1	PP
38671_at	PLXND1*	plexin D1	0.657	1.343	0.489203	1	1	PP
202675_at	SDHB	succinate dehydrogenase complex, subunit B, iron sulfur (Ip)	0.658	1.342	0.490313	1	1	PP
209142_s_at	UBE2G1*	ubiquitin-conjugating enzyme E2G 1 (UBC7 homolog, yeast)	0.658	1.342	0.490313	1	1	PP
209381_x_at	SF3A2*	splicing factor 3a, subunit 2, 66kDa	0.658	1.342	0.490313	0	1	P50
218219_s_at	LANCL2*	LanC lantibiotic synthetase component C-like 2 (bacterial)	0.658	1.342	0.490313	1	1	PP
225906_at			0.658	1.342	0.490313	0	1	P50
1555758_a_at	CDKN3*	cyclin-dependent kinase inhibitor 3 (CDK2-associated dual specificity phosphatase)	0.659	1.341	0.491424	1	1	PP
212290_at	SLC7A1*	solute carrier family 7 (cationic amino acid transporter, y+ system), member 1	0.659	1.341	0.491424	0	1	P50
213629_x_at	MT1F*	metallothionein 1F	0.659	1.341	0.491424	1	1	PP
219041_s_at	REPIN1	replication initiator 1	0.659	1.341	0.491424	1	1	PP
222500_at	PPIL1	peptidylprolyl isomerase (cyclophilin)-like 1	0.659	1.341	0.491424	1	1	PP
225418_at			0.659	1.341	0.491424	1	1	PP
227449_at	EPHA4*	EPH receptor A4	0.659	1.341	0.491424	1	1	PP
235113_at	PPIL5*	peptidylprolyl isomerase (cyclophilin)-like 5	0.659	1.341	0.491424	1	1	PP
239835_at	KBTBD8	kelch repeat and BTB (POZ) domain containing 8	0.659	1.341	0.491424	1	1	PP
1553991_s_at	FLJ20674*	hypothetical protein FLJ20674	0.66	1.34	0.492537	1	1	PP
209700_x_at	PDE4DIP*	phosphodiesterase 4D interacting protein (myomegalin)	0.66	1.34	0.492537	0	1	P50
217185_s_at	ZNF259*	zinc finger protein 259	0.66	1.34	0.492537	1	1	PP
219824_at	SLC13A4*	solute carrier family 13 (sodium/sulfate symporters), member 4	0.66	1.34	0.492537	0	1	P50
219956_at	GALNT6*	UDP-N-acetyl-alpha-D-galactosamine:polypeptide N-acetylgalactosaminyltransferase 6 (GalNAc-T6)	0.66	1.34	0.492537	1	1	PP
228753_at			0.66	1.34	0.492537	0	1	P50
230028_at	KIAA0907*	KIAA0907	0.66	1.34	0.492537	1	1	PP
237563_s_at			0.66	1.34	0.492537	0	1	P50
239023_at	CDC42SE1*	CDC42 small effector 1	0.66	1.34	0.492537	0	1	P50
243434_at	C1ORF75*	chromosome 1 open reading frame 75	0.66	1.34	0.492537	0	1	P50
243688_at	LOC285431	hypothetical protein LOC285431	0.66	1.34	0.492537	1	1	PP
244343_at			0.66	1.34	0.492537	0	1	P50
201836_s_at	SUPT7L*	suppressor of Ty 7 (S. cerevisiae)-like	0.661	1.339	0.493652	1	1	PP
202484_s_at	MBD2*	methyl-CpG binding domain protein 2	0.661	1.339	0.493652	1	1	PP
203584_at	TTC35	tetratricopeptide repeat domain 35	0.661	1.339	0.493652	1	1	PP
204149_s_at	GSTM4*	glutathione S-transferase M4	0.661	1.339	0.493652	1	1	PP
205503_at	PTPN14	protein tyrosine phosphatase, non-receptor type 14	0.661	1.339	0.493652	1	1	PP
211300_s_at	TP53*	tumor protein p53 (Li-Fraumeni syndrome)	0.661	1.339	0.493652	1	1	PP
212683_at	SLC25A44*	solute carrier family 25, member 44	0.661	1.339	0.493652	1	1	PP
217755_at	HN1*	hematological and neurological expressed 1	0.661	1.339	0.493652	1	1	PP
224869_s_at	MRPS25*	mitochondrial ribosomal protein S25	0.661	1.339	0.493652	1	1	PP
225380_at	LOC91461	hypothetical protein BC007901	0.661	1.339	0.493652	0	1	P50
226715_at	FOXK1	forkhead box K1	0.661	1.339	0.493652	1	1	PP
228882_at	TUB	tubby homolog (mouse)	0.661	1.339	0.493652	1	1	PP
236109_at	RPUSD4*	RNA pseudouridylate synthase domain containing 4	0.661	1.339	0.493652	1	1	PP
241344_at	GLB1*	galactosidase, beta 1	0.661	1.339	0.493652	1	1	PP
202865_at	DNAJB12*	DnaJ (Hsp40) homolog, subfamily B, member 12	0.662	1.338	0.494768	1	1	PP
204649_at	TROAP*	trophinin associated protein (tastin)	0.662	1.338	0.494768	1	1	PP
210517_s_at	AKAP12*	A kinase (PRKA) anchor protein (gravin) 12	0.662	1.338	0.494768	1	1	PP
218982_s_at	MRPS17	mitochondrial ribosomal protein S17	0.662	1.338	0.494768	1	1	PP
221866_at	TFEB*	transcription factor EB	0.662	1.338	0.494768	1	1	PP
228987_at			0.662	1.338	0.494768	1	1	PP
241908_at	C1ORF58*	chromosome 1 open reading frame 58	0.662	1.338	0.494768	1	1	PP
1554757_a_at	INPP5A*	inositol polyphosphate-5-phosphatase, 40kDa	0.663	1.337	0.495886	0	1	P50
1555437_at	EARS2*	glutamyl-tRNA synthetase 2, mitochondrial (putative)	0.663	1.337	0.495886	1	1	PP
201204_s_at	RRBP1*	ribosome binding protein 1 homolog 180kDa (dog)	0.663	1.337	0.495886	1	1	PP
207711_at	C20ORF117*	chromosome 20 open reading frame 117	0.663	1.337	0.495886	1	1	PP
209000_s_at	SEPT8*	septin 8	0.663	1.337	0.495886	1	1	PP
212762_s_at	TCF7L2*	transcription factor 7-like 2 (T-cell specific, HMG-box)	0.663	1.337	0.495886	1	1	PP
217835_x_at	C20ORF24*	chromosome 20 open reading frame 24	0.663	1.337	0.495886	1	1	PP
221492_s_at	ATG3*	ATG3 autophagy related 3 homolog (S. cerevisiae)	0.663	1.337	0.495886	1	1	PP
223641_at	MIA3*	melanoma inhibitory activity family, member 3	0.663	1.337	0.495886	0	1	P50
225594_at	CREBZF*	CREB/ATF bZIP transcription factor	0.663	1.337	0.495886	0	1	P50
226378_s_at	C19ORF25	chromosome 19 open reading frame 25	0.663	1.337	0.495886	1	1	PP
227099_s_at	LOC387763	hypothetical LOC387763	0.663	1.337	0.495886	1	1	PP
230461_s_at	MUM1*	melanoma associated antigen (mutated) 1	0.663	1.337	0.495886	1	1	PP
235058_at	ATPBD1B*	ATP binding domain 1 family, member B	0.663	1.337	0.495886	1	1	PP
238467_at			0.663	1.337	0.495886	1	1	PP
205103_at	C1ORF61*	chromosome 1 open reading frame 61	0.664	1.336	0.497006	1	1	PP
205352_at	SERPINI1	serpin peptidase inhibitor, clade I (neuroserpin), member 1	0.664	1.336	0.497006	0	1	P50
208903_at	RPS28 (includes EG:6234)*	ribosomal protein S28	0.664	1.336	0.497006	1	1	PP
209825_s_at	UCK2 (includes EG:7371)	uridine-cytidine kinase 2	0.664	1.336	0.497006	1	1	PP
216205_s_at	MFN2*	mitofusin 2	0.664	1.336	0.497006	1	1	PP
218754_at	NOL9*	nucleolar protein 9	0.664	1.336	0.497006	1	1	PP
223613_at	UQCR*	ubiquinol-cytochrome c reductase, 6.4kDa subunit	0.664	1.336	0.497006	1	1	PP
229074_at			0.664	1.336	0.497006	1	1	PP
1564651_at	LOC221710*	hypothetical protein LOC221710	0.665	1.335	0.498127	1	1	PP
202866_at	DNAJB12*	DnaJ (Hsp40) homolog, subfamily B, member 12	0.665	1.335	0.498127	1	1	PP
205677_s_at	DLEU1	deleted in lymphocytic leukemia, 1	0.665	1.335	0.498127	1	1	PP
205865_at	ARID3A	AT rich interactive domain 3A (BRIGHT-like)	0.665	1.335	0.498127	1	1	PP
212966_at	HIC2*	hypermethylated in cancer 2	0.665	1.335	0.498127	1	1	PP
218966_at	MYO5C	myosin VC	0.665	1.335	0.498127	1	1	PP
225231_at	CBL*	Cas-Br-M (murine) ecotropic retroviral transforming sequence	0.665	1.335	0.498127	1	1	PP
226558_at			0.665	1.335	0.498127	1	1	PP
1555821_a_at	AKT1S1*	AKT1 substrate 1 (proline-rich)	0.666	1.334	0.49925	1	1	PP
202925_s_at	PLAGL2*	pleiomorphic adenoma gene-like 2	0.666	1.334	0.49925	1	1	PP
203432_at	TMPO*	thymopoietin	0.666	1.334	0.49925	1	1	PP
208129_x_at	RUNX1*	runt-related transcription factor 1 (acute myeloid leukemia 1; aml1 oncogene)	0.666	1.334	0.49925	0	1	P50
208922_s_at	NXF1	nuclear RNA export factor 1	0.666	1.334	0.49925	1	1	PP
211964_at	COL4A2*	collagen, type IV, alpha 2	0.666	1.334	0.49925	1	1	PP
212313_at	CHMP7	CHMP family, member 7	0.666	1.334	0.49925	1	1	PP
219428_s_at	PXMP4	peroxisomal membrane protein 4, 24kDa	0.666	1.334	0.49925	1	1	PP
222691_at	SLC35B3*	solute carrier family 35, member B3	0.666	1.334	0.49925	1	1	PP
232060_at	ROR1 (includes EG:4919)*	receptor tyrosine kinase-like orphan receptor 1	0.666	1.334	0.49925	1	1	PP
235886_at	ADAM15*	ADAM metallopeptidase domain 15	0.666	1.334	0.49925	1	1	PP
236662_at	CRAMP1L*	Crm, cramped-like (Drosophila)	0.666	1.334	0.49925	1	1	PP
33322_i_at	SFN*	stratifin	0.666	1.334	0.49925	1	1	PP
201058_s_at	MYL9	myosin, light chain 9, regulatory	0.667	1.333	0.500375	0	1	P50
202207_at	ARL4C*	ADP-ribosylation factor-like 4C	0.667	1.333	0.500375	1	1	PP
213035_at	ANKRD28*	ankyrin repeat domain 28	0.667	1.333	0.500375	0	1	P50
220200_s_at	SETD8*	SET domain containing (lysine methyltransferase) 8	0.667	1.333	0.500375	1	1	PP
227543_at	RNASEH2C*	ribonuclease H2, subunit C	0.667	1.333	0.500375	0	1	P50
231065_at			0.667	1.333	0.500375	0	1	P50
233077_at	FLJ13439	hypothetical gene supported by AK023501	0.667	1.333	0.500375	0	1	P50
233851_s_at	TOR3A*	torsin family 3, member A	0.667	1.333	0.500375	0	1	P50
1554482_a_at	SAR1B*	SAR1 gene homolog B (S. cerevisiae)	0.668	1.332	0.501502	1	1	PP
201793_x_at	SMG7*	Smg-7 homolog, nonsense mediated mRNA decay factor (C. elegans)	0.668	1.332	0.501502	1	1	PP
204336_s_at	RGS19	regulator of G-protein signalling 19	0.668	1.332	0.501502	1	1	PP
205613_at	SYT17*	synaptotagmin XVII	0.668	1.332	0.501502	0	1	P50
215252_at	DNAJC7*	DnaJ (Hsp40) homolog, subfamily C, member 7	0.668	1.332	0.501502	0	1	P50
218661_at	FLJ14154*	hypothetical protein FLJ14154	0.668	1.332	0.501502	1	1	PP
219911_s_at	SLCO4A1	solute carrier organic anion transporter family, member 4A1	0.668	1.332	0.501502	1	1	PP
225696_at	COPS7B*	COP9 constitutive photomorphogenic homolog subunit 7B (Arabidopsis)	0.668	1.332	0.501502	1	1	PP
238704_at			0.668	1.332	0.501502	1	1	PP
243531_at	ORAOV1	oral cancer overexpressed 1	0.668	1.332	0.501502	0	1	P50
1556110_at			0.5	0.995	0.502513	0	1	P50
1567044_s_at	LSM14A*	LSM14A, SCD6 homolog A (S. cerevisiae)	0.669	1.331	0.50263	0	1	P50
222493_s_at	ZFAND3*	zinc finger, AN1-type domain 3	0.669	1.331	0.50263	1	1	PP
226036_x_at	CASP2*	caspase 2, apoptosis-related cysteine peptidase (neural precursor cell expressed, developmentally down-regulated 2)	0.669	1.331	0.50263	1	1	PP
228435_at	FEM1A*	fem-1 homolog a (C. elegans)	0.669	1.331	0.50263	1	1	PP
239012_at	IBRDC2*	IBR domain containing 2	0.669	1.331	0.50263	0	1	P50
242509_at	C16ORF74*	chromosome 16 open reading frame 74	0.669	1.331	0.50263	0	1	P50
203694_s_at	DHX16	DEAH (Asp-Glu-Ala-His) box polypeptide 16	0.67	1.33	0.503759	1	1	PP
204270_at			0.67	1.33	0.503759	1	1	PP
205287_s_at	TFAP2C*	transcription factor AP-2 gamma (activating enhancer binding protein 2 gamma)	0.67	1.33	0.503759	1	1	PP
208132_x_at	BAT2*	HLA-B associated transcript 2	0.67	1.33	0.503759	1	1	PP
210001_s_at	SOCS1	suppressor of cytokine signaling 1	0.67	1.33	0.503759	1	1	PP
214508_x_at	CREM*	cAMP responsive element modulator	0.67	1.33	0.503759	1	1	PP
222479_s_at	DYNC1LI1*	dynein, cytoplasmic 1, light intermediate chain 1	0.67	1.33	0.503759	1	1	PP
223264_at	MESDC1*	mesoderm development candidate 1	0.67	1.33	0.503759	1	1	PP
223655_at	CD163L1	CD163 molecule-like 1	0.67	1.33	0.503759	1	1	PP
228997_at	TRSPAP1*	tRNA selenocysteine associated protein 1	0.67	1.33	0.503759	0	1	P50
1560916_a_at	DPY19L1*	dpy-19-like 1 (C. elegans)	0.671	1.329	0.504891	1	1	PP
207388_s_at	PTGES*	prostaglandin E synthase	0.671	1.329	0.504891	1	1	PP
213670_x_at	NSUN5B*	NOL1/NOP2/Sun domain family, member 5B	0.671	1.329	0.504891	1	1	PP
218441_s_at	RPAP1	RNA polymerase II associated protein 1	0.671	1.329	0.504891	1	1	PP
225824_at	CCNK	cyclin K	0.671	1.329	0.504891	1	1	PP
227897_at	RAP2B*	RAP2B, member of RAS oncogene family	0.671	1.329	0.504891	1	1	PP
228487_s_at	RREB1*	ras responsive element binding protein 1	0.671	1.329	0.504891	1	1	PP
229396_at	OVOL1*	ovo-like 1(Drosophila)	0.671	1.329	0.504891	1	1	PP
209587_at	PITX1	paired-like homeodomain 1	0.672	1.328	0.506024	0	1	P50
212780_at	SOS1*	son of sevenless homolog 1 (Drosophila)	0.672	1.328	0.506024	1	1	PP
218526_s_at	RANGRF*	RAN guanine nucleotide release factor	0.672	1.328	0.506024	1	1	PP
219363_s_at	MTERFD1	MTERF domain containing 1	0.672	1.328	0.506024	1	1	PP
219450_at	C4ORF19*	chromosome 4 open reading frame 19	0.672	1.328	0.506024	1	1	PP
219745_at	TMEM180	transmembrane protein 180	0.672	1.328	0.506024	1	1	PP
221851_at	LOC90379*	hypothetical protein BC002926	0.672	1.328	0.506024	1	1	PP
223212_at	ZDHHC16	zinc finger, DHHC-type containing 16	0.672	1.328	0.506024	1	1	PP
225358_at	DNAJC19*	DnaJ (Hsp40) homolog, subfamily C, member 19	0.672	1.328	0.506024	1	1	PP
225887_at	C13ORF23*	chromosome 13 open reading frame 23	0.672	1.328	0.506024	1	1	PP
227556_at	NME7*	non-metastatic cells 7, protein expressed in (nucleoside-diphosphate kinase)	0.672	1.328	0.506024	1	1	PP
235882_at			0.672	1.328	0.506024	1	1	PP
1555270_a_at	WFS1*	Wolfram syndrome 1 (wolframin)	0.673	1.327	0.507159	1	1	PP
1560485_at	HIVEP1*	human immunodeficiency virus type I enhancer binding protein 1	0.673	1.327	0.507159	1	1	PP
1560662_s_at	WHDC1L1*	WAS protein homology region 2 domain containing 1-like 1	0.673	1.327	0.507159	0	1	P50
1560696_x_at	QTRTD1*	queuine tRNA-ribosyltransferase domain containing 1	0.673	1.327	0.507159	1	1	PP
218398_at	MRPS30	mitochondrial ribosomal protein S30	0.673	1.327	0.507159	1	1	PP
219320_at	MYOHD1*	myosin head domain containing 1	0.673	1.327	0.507159	1	1	PP
221840_at	PTPRE	protein tyrosine phosphatase, receptor type, E	0.673	1.327	0.507159	1	1	PP
223365_at	DHX37*	DEAH (Asp-Glu-Ala-His) box polypeptide 37	0.673	1.327	0.507159	0	1	P50
228093_at	ZNF599*	zinc finger protein 599	0.673	1.327	0.507159	1	1	PP
210008_s_at	MRPS12*	mitochondrial ribosomal protein S12	0.674	1.326	0.508296	1	1	PP
218300_at	C16ORF53	chromosome 16 open reading frame 53	0.674	1.326	0.508296	0	1	P50
225150_s_at	RTKN*	rhotekin	0.674	1.326	0.508296	1	1	PP
227686_at	OXNAD1	oxidoreductase NAD-binding domain containing 1	0.674	1.326	0.508296	1	1	PP
238508_at	DBF4B*	DBF4 homolog B (S. cerevisiae)	0.674	1.326	0.508296	1	1	PP
201420_s_at	WDR77*	WD repeat domain 77	0.675	1.325	0.509434	1	1	PP
204015_s_at	DUSP4	dual specificity phosphatase 4	0.675	1.325	0.509434	0	1	P50
204678_s_at	KCNK1*	potassium channel, subfamily K, member 1	0.675	1.325	0.509434	1	1	PP
205742_at	TNNI3	troponin I type 3 (cardiac)	0.675	1.325	0.509434	0	1	P50
208228_s_at	FGFR2*	fibroblast growth factor receptor 2 (bacteria-expressed kinase, keratinocyte growth factor receptor, craniofacial dysostosis 1, Crouzon syndrome, Pfeiffer syndrome, Jackson-Weiss syndrome)	0.675	1.325	0.509434	1	1	PP
213153_at	SETD1B	SET domain containing 1B	0.675	1.325	0.509434	1	1	PP
222916_s_at	HDLBP*	high density lipoprotein binding protein (vigilin)	0.675	1.325	0.509434	1	1	PP
225187_at	KIAA1967*	KIAA1967	0.675	1.325	0.509434	1	1	PP
228379_at	NUTF2*	nuclear transport factor 2	0.675	1.325	0.509434	1	1	PP
229053_at	SYT17*	synaptotagmin XVII	0.604	1.184	0.510135	0	1	P50
203782_s_at	POLRMT	polymerase (RNA) mitochondrial (DNA directed)	0.676	1.324	0.510574	1	1	PP
213734_at	WSB2*	WD repeat and SOCS box-containing 2	0.676	1.324	0.510574	1	1	PP
215274_at	SLC12A3*	solute carrier family 12 (sodium/chloride transporters), member 3	0.676	1.324	0.510574	1	1	PP
219117_s_at	FKBP11*	FK506 binding protein 11, 19 kDa	0.676	1.324	0.510574	1	1	PP
221216_s_at	SCMH1	sex comb on midleg homolog 1 (Drosophila)	0.676	1.324	0.510574	1	1	PP
222824_at	SEC61A2*	Sec61 alpha 2 subunit (S. cerevisiae)	0.676	1.324	0.510574	1	1	PP
226716_at	PRR12	proline rich 12	0.676	1.324	0.510574	0	1	P50
227514_at	LOC162073*	hypothetical protein LOC162073	0.676	1.324	0.510574	1	1	PP
228606_at	MGC33212	hypothetical protein MGC33212	0.676	1.324	0.510574	1	1	PP
239247_at			0.676	1.324	0.510574	1	1	PP
1558152_at	TSPAN4*	tetraspanin 4	0.677	1.323	0.511716	1	1	PP
204186_s_at	PPID*	peptidylprolyl isomerase D (cyclophilin D)	0.677	1.323	0.511716	1	1	PP
210552_s_at	RALGPS1*	Ral GEF with PH domain and SH3 binding motif 1	0.677	1.323	0.511716	1	1	PP
212761_at	TCF7L2*	transcription factor 7-like 2 (T-cell specific, HMG-box)	0.677	1.323	0.511716	1	1	PP
212770_at	TLE3*	transducin-like enhancer of split 3 (E(sp1) homolog, Drosophila)	0.677	1.323	0.511716	1	1	PP
213954_at	KIAA0888*	KIAA0888 protein	0.677	1.323	0.511716	1	1	PP
214711_at	15E1.2	hypothetical protein LOC283459	0.677	1.323	0.511716	1	1	PP
224484_s_at	BRMS1L*	breast cancer metastasis-suppressor 1-like	0.677	1.323	0.511716	1	1	PP
225454_at	CCDC124*	coiled-coil domain containing 124	0.677	1.323	0.511716	1	1	PP
225756_at	CSNK1E*	casein kinase 1, epsilon	0.677	1.323	0.511716	1	1	PP
226364_at	HIP1*	huntingtin interacting protein 1	0.677	1.323	0.511716	1	1	PP
229052_at	ANKRD23*	ankyrin repeat domain 23	0.677	1.323	0.511716	0	1	P50
231274_s_at			0.677	1.323	0.511716	1	1	PP
201280_s_at	DAB2*	disabled homolog 2, mitogen-responsive phosphoprotein (Drosophila)	0.678	1.322	0.512859	1	1	PP
201666_at	TIMP1	TIMP metallopeptidase inhibitor 1	0.678	1.322	0.512859	1	1	PP
209181_s_at	RABGGTB*	Rab geranylgeranyltransferase, beta subunit	0.678	1.322	0.512859	1	1	PP
212916_at	PHF8	PHD finger protein 8	0.678	1.322	0.512859	1	1	PP
213945_s_at	NUP210*	nucleoporin 210kDa	0.678	1.322	0.512859	0	1	P50
223307_at	CDCA3*	cell division cycle associated 3	0.678	1.322	0.512859	1	1	PP
223364_s_at	DHX37*	DEAH (Asp-Glu-Ala-His) box polypeptide 37	0.678	1.322	0.512859	1	1	PP
227583_at	POP4*	processing of precursor 4, ribonuclease P/MRP subunit (S. cerevisiae)	0.678	1.322	0.512859	1	1	PP
202274_at	ACTG2	actin, gamma 2, smooth muscle, enteric	0.679	1.321	0.514005	1	1	PP
202931_x_at	BIN1*	bridging integrator 1	0.679	1.321	0.514005	1	1	PP
205425_at	HIP1*	huntingtin interacting protein 1	0.679	1.321	0.514005	1	1	PP
209246_at	ABCF2*	ATP-binding cassette, sub-family F (GCN20), member 2	0.679	1.321	0.514005	1	1	PP
212056_at	KIAA0182*	KIAA0182	0.679	1.321	0.514005	1	1	PP
213246_at	C14ORF109	chromosome 14 open reading frame 109	0.679	1.321	0.514005	1	1	PP
218567_x_at	DPP3*	dipeptidyl-peptidase 3	0.679	1.321	0.514005	1	1	PP
225851_at	FNTB*	farnesyltransferase, CAAX box, beta	0.679	1.321	0.514005	1	1	PP
235085_at	DKFZP761P0423*	homolog of rat pragma of Rnd2	0.679	1.321	0.514005	1	1	PP
200799_at	HSPA1A*	heat shock 70kDa protein 1A	0.68	1.32	0.515152	1	1	PP
202504_at	TRIM29	tripartite motif-containing 29	0.68	1.32	0.515152	0	1	P50
210802_s_at	DIMT1L*	DIM1 dimethyladenosine transferase 1-like (S. cerevisiae)	0.68	1.32	0.515152	1	1	PP
223880_x_at	C20ORF24*	chromosome 20 open reading frame 24	0.68	1.32	0.515152	1	1	PP
229426_at	COX5A*	cytochrome c oxidase subunit Va	0.68	1.32	0.515152	1	1	PP
230364_at	CHPT1*	choline phosphotransferase 1	0.68	1.32	0.515152	1	1	PP
205656_at	PCDH17*	protocadherin 17	0.676	1.312	0.515244	0	1	P50
200703_at	DYNLL1	dynein, light chain, LC8-type 1	0.681	1.319	0.5163	1	1	PP
206499_s_at	RCC1 (includes EG:1104)*	regulator of chromosome condensation 1	0.681	1.319	0.5163	1	1	PP
213119_at	SLC36A1	solute carrier family 36 (proton/amino acid symporter), member 1	0.681	1.319	0.5163	1	1	PP
218850_s_at	LIMD1*	LIM domains containing 1	0.681	1.319	0.5163	1	1	PP
220521_s_at	ATG16L1*	ATG16 autophagy related 16-like 1 (S. cerevisiae)	0.681	1.319	0.5163	1	1	PP
223912_s_at	CLN8*	ceroid-lipofuscinosis, neuronal 8 (epilepsy, progressive with mental retardation)	0.681	1.319	0.5163	1	1	PP
AFFX-r2-Bs-dap-5_at			0.681	1.319	0.5163	1	1	PP
1556389_at	TNRC5*	trinucleotide repeat containing 5	0.682	1.318	0.517451	1	1	PP
201611_s_at	ICMT*	isoprenylcysteine carboxyl methyltransferase	0.682	1.318	0.517451	1	1	PP
201748_s_at	SAFB*	scaffold attachment factor B	0.682	1.318	0.517451	1	1	PP
208794_s_at	SMARCA4*	SWI/SNF related, matrix associated, actin dependent regulator of chromatin, subfamily a, member 4	0.682	1.318	0.517451	1	1	PP
209518_at	SMARCD1*	SWI/SNF related, matrix associated, actin dependent regulator of chromatin, subfamily d, member 1	0.682	1.318	0.517451	1	1	PP
211814_s_at	CCNE2 (includes EG:9134)*	cyclin E2	0.682	1.318	0.517451	0	1	P50
213633_at	SH3BP1	SH3-domain binding protein 1	0.682	1.318	0.517451	1	1	PP
219010_at	C1ORF106	chromosome 1 open reading frame 106	0.682	1.318	0.517451	1	1	PP
220987_s_at	NUAK2	NUAK family, SNF1-like kinase, 2	0.682	1.318	0.517451	1	1	PP
225567_at			0.682	1.318	0.517451	1	1	PP
225676_s_at	WDSOF1*	WD repeats and SOF1 domain containing	0.682	1.318	0.517451	1	1	PP
228142_at	UCRC*	ubiquinol-cytochrome c reductase complex (7.2 kD)	0.682	1.318	0.517451	1	1	PP
235117_at	CHAC2	ChaC, cation transport regulator homolog 2 (E. coli)	0.682	1.318	0.517451	0	1	P50
236907_at	PABPC1*	poly(A) binding protein, cytoplasmic 1	0.682	1.318	0.517451	1	1	PP
240240_at	UBE2J2*	ubiquitin-conjugating enzyme E2, J2 (UBC6 homolog, yeast)	0.682	1.318	0.517451	1	1	PP
201979_s_at	PPP5C*	protein phosphatase 5, catalytic subunit	0.683	1.317	0.518603	1	1	PP
214515_at	OR1E2	olfactory receptor, family 1, subfamily E, member 2	0.683	1.317	0.518603	1	1	PP
217612_at	TIMM50*	translocase of inner mitochondrial membrane 50 homolog (S. cerevisiae)	0.683	1.317	0.518603	1	1	PP
217834_s_at	SYNCRIP*	synaptotagmin binding, cytoplasmic RNA interacting protein	0.683	1.317	0.518603	1	1	PP
222155_s_at	GPR172A*	G protein-coupled receptor 172A	0.683	1.317	0.518603	1	1	PP
225933_at	CCDC137	coiled-coil domain containing 137	0.683	1.317	0.518603	1	1	PP
227169_at	DNAJC18*	DnaJ (Hsp40) homolog, subfamily C, member 18	0.683	1.317	0.518603	0	1	P50
230087_at	PRIMA1	proline rich membrane anchor 1	0.683	1.317	0.518603	0	1	P50
232755_at	UBE2G2*	ubiquitin-conjugating enzyme E2G 2 (UBC7 homolog, yeast)	0.683	1.317	0.518603	0	1	P50
1561908_a_at	HS3ST3B1	heparan sulfate (glucosamine) 3-O-sulfotransferase 3B1	0.684	1.316	0.519757	1	1	PP
200890_s_at	SSR1*	signal sequence receptor, alpha (translocon-associated protein alpha)	0.684	1.316	0.519757	1	1	PP
201435_s_at	EIF4E*	eukaryotic translation initiation factor 4E	0.684	1.316	0.519757	1	1	PP
204233_s_at	CHKA*	choline kinase alpha	0.684	1.316	0.519757	1	1	PP
204538_x_at	NPIP*	nuclear pore complex interacting protein	0.684	1.316	0.519757	0	1	P50
208141_s_at	DOHH	deoxyhypusine hydroxylase/monooxygenase	0.684	1.316	0.519757	1	1	PP
208361_s_at	POLR3D	polymerase (RNA) III (DNA directed) polypeptide D, 44kDa	0.684	1.316	0.519757	1	1	PP
208813_at	GOT1	glutamic-oxaloacetic transaminase 1, soluble (aspartate aminotransferase 1)	0.684	1.316	0.519757	1	1	PP
209087_x_at	MCAM*	melanoma cell adhesion molecule	0.684	1.316	0.519757	1	1	PP
211342_x_at	MED12*	mediator of RNA polymerase II transcription, subunit 12 homolog (S. cerevisiae)	0.684	1.316	0.519757	1	1	PP
212003_at	C1ORF144*	chromosome 1 open reading frame 144	0.684	1.316	0.519757	1	1	PP
212218_s_at	FASN	fatty acid synthase	0.684	1.316	0.519757	1	1	PP
219997_s_at	COPS7B*	COP9 constitutive photomorphogenic homolog subunit 7B (Arabidopsis)	0.684	1.316	0.519757	1	1	PP
232682_at	MREG*	melanoregulin	0.684	1.316	0.519757	1	1	PP
241852_at			0.684	1.316	0.519757	0	1	P50
1555461_at			0.685	1.315	0.520913	1	1	PP
202640_s_at	RANBP3*	RAN binding protein 3	0.685	1.315	0.520913	1	1	PP
209322_s_at	SH2B1*	SH2B adaptor protein 1	0.685	1.315	0.520913	0	1	P50
210162_s_at	NFATC1	nuclear factor of activated T-cells, cytoplasmic, calcineurin-dependent 1	0.685	1.315	0.520913	1	1	PP
212702_s_at	BICD2*	bicaudal D homolog 2 (Drosophila)	0.685	1.315	0.520913	1	1	PP
219289_at	HEATR3*	HEAT repeat containing 3	0.685	1.315	0.520913	1	1	PP
223425_at	RAVER1	ribonucleoprotein, PTB-binding 1	0.685	1.315	0.520913	0	1	P50
236946_at	GPR75	G protein-coupled receptor 75	0.685	1.315	0.520913	0	1	P50
40149_at	SH2B1*	SH2B adaptor protein 1	0.685	1.315	0.520913	1	1	PP
1569629_x_at			0.686	1.314	0.52207	1	1	PP
200628_s_at	WARS*	tryptophanyl-tRNA synthetase	0.686	1.314	0.52207	0	1	P50
210801_at	DIMT1L*	DIM1 dimethyladenosine transferase 1-like (S. cerevisiae)	0.686	1.314	0.52207	1	1	PP
211980_at	COL4A1*	collagen, type IV, alpha 1	0.686	1.314	0.52207	1	1	PP
212528_at			0.686	1.314	0.52207	1	1	PP
218420_s_at	C13ORF23*	chromosome 13 open reading frame 23	0.686	1.314	0.52207	1	1	PP
223546_x_at	LUC7L*	LUC7-like (S. cerevisiae)	0.686	1.314	0.52207	0	1	P50
47083_at	C7ORF26	chromosome 7 open reading frame 26	0.686	1.314	0.52207	1	1	PP
201167_x_at	ARHGDIA*	Rho GDP dissociation inhibitor (GDI) alpha	0.687	1.313	0.523229	1	1	PP
201616_s_at	CALD1*	caldesmon 1	0.687	1.313	0.523229	1	1	PP
203861_s_at	ACTN2	actinin, alpha 2	0.687	1.313	0.523229	0	1	P50
205172_x_at	CLTB*	clathrin, light chain (Lcb)	0.687	1.313	0.523229	1	1	PP
209967_s_at	CREM*	cAMP responsive element modulator	0.687	1.313	0.523229	1	1	PP
215357_s_at	POLDIP3*	polymerase (DNA-directed), delta interacting protein 3	0.687	1.313	0.523229	1	1	PP
228380_at			0.687	1.313	0.523229	1	1	PP
228388_at	NFKBIB	nuclear factor of kappa light polypeptide gene enhancer in B-cells inhibitor, beta	0.687	1.313	0.523229	0	1	P50
206993_at	ATP5S*	ATP synthase, H+ transporting, mitochondrial F0 complex, subunit s (factor B)	0.688	1.312	0.52439	1	1	PP
218641_at	MGC3032	hypothetical protein MGC3032	0.688	1.312	0.52439	1	1	PP
225453_x_at	CCDC124*	coiled-coil domain containing 124	0.688	1.312	0.52439	0	1	P50
225723_at	C6ORF129	chromosome 6 open reading frame 129	0.688	1.312	0.52439	1	1	PP
227700_x_at	ATAD3A*	ATPase family, AAA domain containing 3A	0.688	1.312	0.52439	1	1	PP
1556555_at			0.689	1.311	0.525553	0	1	P50
203804_s_at	CROP*	cisplatin resistance-associated overexpressed protein	0.689	1.311	0.525553	1	1	PP
210338_s_at	HSPA8*	heat shock 70kDa protein 8	0.689	1.311	0.525553	1	1	PP
222231_s_at	LRRC59	leucine rich repeat containing 59	0.689	1.311	0.525553	1	1	PP
222527_s_at	RBM22*	RNA binding motif protein 22	0.689	1.311	0.525553	1	1	PP
223651_x_at	CDC23 (includes EG:8697)*	cell division cycle 23 homolog (S. cerevisiae)	0.689	1.311	0.525553	1	1	PP
1555419_a_at	ASAH1*	N-acylsphingosine amidohydrolase (acid ceramidase) 1	0.69	1.31	0.526718	0	1	P50
200708_at	GOT2	glutamic-oxaloacetic transaminase 2, mitochondrial (aspartate aminotransferase 2)	0.69	1.31	0.526718	1	1	PP
202230_s_at	CHERP*	calcium homeostasis endoplasmic reticulum protein	0.69	1.31	0.526718	1	1	PP
208836_at	ATP1B3*	ATPase, Na+/K+ transporting, beta 3 polypeptide	0.69	1.31	0.526718	1	1	PP
218076_s_at	ARHGAP17	Rho GTPase activating protein 17	0.69	1.31	0.526718	1	1	PP
224993_at	MLLT1	myeloid/lymphoid or mixed-lineage leukemia (trithorax homolog, Drosophila); translocated to, 1	0.69	1.31	0.526718	1	1	PP
225156_at	ELOF1	elongation factor 1 homolog (S. cerevisiae)	0.69	1.31	0.526718	1	1	PP
227474_at	PAX8*	paired box 8	0.69	1.31	0.526718	1	1	PP
228452_at	C17ORF39*	chromosome 17 open reading frame 39	0.69	1.31	0.526718	1	1	PP
200940_s_at	RERE*	arginine-glutamic acid dipeptide (RE) repeats	0.691	1.309	0.527884	1	1	PP
201714_at	TUBG1	tubulin, gamma 1	0.691	1.309	0.527884	1	1	PP
204091_at	PDE6D*	phosphodiesterase 6D, cGMP-specific, rod, delta	0.691	1.309	0.527884	1	1	PP
204433_s_at	SPATA2*	spermatogenesis associated 2	0.691	1.309	0.527884	0	1	P50
207431_s_at	DEGS1*	degenerative spermatocyte homolog 1, lipid desaturase (Drosophila)	0.691	1.309	0.527884	1	1	PP
209007_s_at	C1ORF63*	chromosome 1 open reading frame 63	0.691	1.309	0.527884	1	1	PP
218254_s_at	SAR1B*	SAR1 gene homolog B (S. cerevisiae)	0.691	1.309	0.527884	1	1	PP
219648_at	MREG*	melanoregulin	0.691	1.309	0.527884	1	1	PP
225400_at	C1ORF19*	chromosome 1 open reading frame 19	0.691	1.309	0.527884	1	1	PP
229010_at	CBL*	Cas-Br-M (murine) ecotropic retroviral transforming sequence	0.691	1.309	0.527884	1	1	PP
232201_at	NKD2	naked cuticle homolog 2 (Drosophila)	0.691	1.309	0.527884	0	1	P50
238628_s_at	TRAPPC2L*	trafficking protein particle complex 2-like	0.691	1.309	0.527884	1	1	PP
1555347_at	PDXDC1*	pyridoxal-dependent decarboxylase domain containing 1	0.692	1.308	0.529052	0	1	P50
202345_s_at	FABP5	fatty acid binding protein 5 (psoriasis-associated)	0.692	1.308	0.529052	1	1	PP
203291_at	CNOT4*	CCR4-NOT transcription complex, subunit 4	0.692	1.308	0.529052	1	1	PP
204695_at	CDC25A*	cell division cycle 25 homolog A (S. pombe)	0.692	1.308	0.529052	1	1	PP
206292_s_at	SULT2A1 (includes EG:6822)	sulfotransferase family, cytosolic, 2A, dehydroepiandrosterone (DHEA)-preferring, member 1	0.692	1.308	0.529052	0	1	P50
209244_s_at	KIF1C	kinesin family member 1C	0.692	1.308	0.529052	1	1	PP
209336_at	PWP2	PWP2 periodic tryptophan protein homolog (yeast)	0.692	1.308	0.529052	1	1	PP
211797_s_at	NFYC*	nuclear transcription factor Y, gamma	0.692	1.308	0.529052	1	1	PP
213323_s_at	ZC3H7B*	zinc finger CCCH-type containing 7B	0.692	1.308	0.529052	1	1	PP
214091_s_at	GPX3*	glutathione peroxidase 3 (plasma)	0.692	1.308	0.529052	1	1	PP
217165_x_at	MT1F*	metallothionein 1F	0.692	1.308	0.529052	1	1	PP
218129_s_at	NFYB*	nuclear transcription factor Y, beta	0.692	1.308	0.529052	1	1	PP
218739_at	ABHD5*	abhydrolase domain containing 5	0.692	1.308	0.529052	1	1	PP
224517_at	MGC13098*	polymerase (RNA) II (DNA directed) polypeptide J, 13.3kDa pseudogene	0.692	1.308	0.529052	1	1	PP
225847_at	AADACL1	arylacetamide deacetylase-like 1	0.692	1.308	0.529052	1	1	PP
226320_at	THOC4*	THO complex 4	0.692	1.308	0.529052	1	1	PP
227790_at	C6ORF157*	chromosome 6 open reading frame 157	0.692	1.308	0.529052	1	1	PP
228277_at	FBXL19	F-box and leucine-rich repeat protein 19	0.692	1.308	0.529052	0	1	P50
235579_at			0.692	1.308	0.529052	0	1	P50
202621_at	IRF3	interferon regulatory factor 3	0.693	1.307	0.530222	1	1	PP
203370_s_at	PDLIM7*	PDZ and LIM domain 7 (enigma)	0.693	1.307	0.530222	0	1	P50
204679_at	KCNK1*	potassium channel, subfamily K, member 1	0.693	1.307	0.530222	1	1	PP
204807_at	TMEM5*	transmembrane protein 5	0.693	1.307	0.530222	1	1	PP
208905_at	CYCS*	cytochrome c, somatic	0.693	1.307	0.530222	1	1	PP
209384_at	PROSC*	proline synthetase co-transcribed homolog (bacterial)	0.693	1.307	0.530222	1	1	PP
215175_at	PCNX*	pecanex homolog (Drosophila)	0.693	1.307	0.530222	1	1	PP
218351_at	COMMD8	COMM domain containing 8	0.693	1.307	0.530222	1	1	PP
218530_at	FHOD1	formin homology 2 domain containing 1	0.693	1.307	0.530222	1	1	PP
222705_s_at	SLC25A15*	solute carrier family 25 (mitochondrial carrier; ornithine transporter) member 15	0.693	1.307	0.530222	1	1	PP
224819_at	TCEAL8	transcription elongation factor A (SII)-like 8	0.693	1.307	0.530222	1	1	PP
227266_s_at	FYB*	FYN binding protein (FYB-120/130)	0.693	1.307	0.530222	1	1	PP
1555292_at	FAM40B*	family with sequence similarity 40, member B	0.694	1.306	0.531394	1	1	PP
1558143_a_at	BCL2L11*	BCL2-like 11 (apoptosis facilitator)	0.694	1.306	0.531394	1	1	PP
204157_s_at	KIAA0999*	KIAA0999 protein	0.694	1.306	0.531394	1	1	PP
204326_x_at	MT1X*	metallothionein 1X	0.694	1.306	0.531394	1	1	PP
210150_s_at	LAMA5	laminin, alpha 5	0.694	1.306	0.531394	1	1	PP
210457_x_at	HMGA1*	high mobility group AT-hook 1	0.694	1.306	0.531394	1	1	PP
213810_s_at	C6ORF166*	chromosome 6 open reading frame 166	0.694	1.306	0.531394	1	1	PP
219023_at	C4ORF16*	chromosome 4 open reading frame 16	0.694	1.306	0.531394	1	1	PP
219118_at	FKBP11*	FK506 binding protein 11, 19 kDa	0.694	1.306	0.531394	0	1	P50
221335_x_at	C19ORF61*	chromosome 19 open reading frame 61	0.694	1.306	0.531394	1	1	PP
222236_s_at	DDEFL1*	development and differentiation enhancing factor-like 1	0.694	1.306	0.531394	1	1	PP
225650_at	SAMD1	sterile alpha motif domain containing 1	0.694	1.306	0.531394	1	1	PP
226319_s_at	THOC4*	THO complex 4	0.694	1.306	0.531394	1	1	PP
233374_at	HIC2*	hypermethylated in cancer 2	0.694	1.306	0.531394	1	1	PP
238417_at	PGM2L1*	phosphoglucomutase 2-like 1	0.694	1.306	0.531394	0	1	P50
238917_s_at	MGC24039	hypothetical protein MGC24039	0.694	1.306	0.531394	0	1	P50
201907_x_at	DVL3*	dishevelled, dsh homolog 3 (Drosophila)	0.695	1.305	0.532567	0	1	P50
210201_x_at	BIN1*	bridging integrator 1	0.695	1.305	0.532567	1	1	PP
211981_at	COL4A1*	collagen, type IV, alpha 1	0.695	1.305	0.532567	1	1	PP
212336_at	EPB41L1	erythrocyte membrane protein band 4.1-like 1	0.695	1.305	0.532567	1	1	PP
222458_s_at	C1ORF108*	chromosome 1 open reading frame 108	0.695	1.305	0.532567	1	1	PP
222599_s_at	NAV2 (includes EG:89797)*	neuron navigator 2	0.695	1.305	0.532567	0	1	P50
224068_x_at	RBM22*	RNA binding motif protein 22	0.695	1.305	0.532567	1	1	PP
225509_at	LOC56757	hypothetical protein LOC56757	0.695	1.305	0.532567	1	1	PP
227093_at	USP36*	ubiquitin specific peptidase 36	0.695	1.305	0.532567	1	1	PP
227473_at	CTTN*	cortactin	0.695	1.305	0.532567	1	1	PP
1563357_at			0.696	1.304	0.533742	1	1	PP
201797_s_at	VARS	valyl-tRNA synthetase	0.696	1.304	0.533742	1	1	PP
208159_x_at	DDX11*	DEAD/H (Asp-Glu-Ala-Asp/His) box polypeptide 11 (CHL1-like helicase homolog, S. cerevisiae)	0.696	1.304	0.533742	0	1	P50
212655_at	ZCCHC14	zinc finger, CCHC domain containing 14	0.696	1.304	0.533742	1	1	PP
217935_s_at	UQCC*	chromosome 20 open reading frame 44	0.696	1.304	0.533742	1	1	PP
222396_at	HN1*	hematological and neurological expressed 1	0.696	1.304	0.533742	1	1	PP
223617_x_at	ATAD3B*	ATPase family, AAA domain containing 3B	0.696	1.304	0.533742	1	1	PP
225119_at	CHMP4B*	chromatin modifying protein 4B	0.696	1.304	0.533742	1	1	PP
240282_at	WDR1*	WD repeat domain 1	0.696	1.304	0.533742	0	1	P50
33767_at	NEFH	neurofilament, heavy polypeptide 200kDa	0.696	1.304	0.533742	0	1	P50
AFFX-ThrX-5_at			0.696	1.304	0.533742	1	1	PP
1565269_s_at	ATF1*	activating transcription factor 1	0.697	1.303	0.534919	1	1	PP
218719_s_at	GINS3*	GINS complex subunit 3 (Psf3 homolog)	0.697	1.303	0.534919	1	1	PP
225104_at	ZNF598	zinc finger protein 598	0.697	1.303	0.534919	1	1	PP
225959_s_at	ZNRF1*	zinc and ring finger 1	0.697	1.303	0.534919	1	1	PP
238190_at	TUFM*	Tu translation elongation factor, mitochondrial	0.697	1.303	0.534919	1	1	PP
1553354_a_at	FLJ31958*	hypothetical protein FLJ31958	0.68	1.271	0.535012	1	1	PP
1553224_at	LUZP1*	leucine zipper protein 1	0.698	1.302	0.536098	1	1	PP
201123_s_at	EIF5A*	eukaryotic translation initiation factor 5A	0.698	1.302	0.536098	1	1	PP
202008_s_at	NID1*	nidogen 1	0.698	1.302	0.536098	1	1	PP
202326_at	EHMT2	euchromatic histone-lysine N-methyltransferase 2	0.698	1.302	0.536098	1	1	PP
202369_s_at	TRAM2*	translocation associated membrane protein 2	0.698	1.302	0.536098	1	1	PP
203286_at	RNF44	ring finger protein 44	0.698	1.302	0.536098	1	1	PP
203702_s_at	TTLL4*	tubulin tyrosine ligase-like family, member 4	0.698	1.302	0.536098	1	1	PP
208938_at	PRCC	papillary renal cell carcinoma (translocation-associated)	0.698	1.302	0.536098	1	1	PP
210892_s_at	GTF2I*	general transcription factor II, i	0.698	1.302	0.536098	0	1	P50
212520_s_at	SMARCA4*	SWI/SNF related, matrix associated, actin dependent regulator of chromatin, subfamily a, member 4	0.698	1.302	0.536098	1	1	PP
221745_at	WDR68*	WD repeat domain 68	0.698	1.302	0.536098	1	1	PP
224232_s_at	PRELID1*	PRELI domain containing 1	0.698	1.302	0.536098	1	1	PP
225441_x_at	LSMD1*	LSM domain containing 1	0.698	1.302	0.536098	1	1	PP
227744_s_at	HNRPD*	heterogeneous nuclear ribonucleoprotein D (AU-rich element RNA binding protein 1, 37kDa)	0.698	1.302	0.536098	0	1	P50
230055_at	C6ORF148*	chromosome 6 open reading frame 148	0.698	1.302	0.536098	1	1	PP
231843_at	DDX55	DEAD (Asp-Glu-Ala-Asp) box polypeptide 55	0.698	1.302	0.536098	1	1	PP
1553947_at	EXOSC6*	exosome component 6	0.699	1.301	0.537279	1	1	PP
201895_at	ARAF*	v-raf murine sarcoma 3611 viral oncogene homolog	0.699	1.301	0.537279	1	1	PP
202580_x_at	FOXM1	forkhead box M1	0.699	1.301	0.537279	1	1	PP
203276_at	LMNB1	lamin B1	0.699	1.301	0.537279	1	1	PP
208660_at	CS	citrate synthase	0.699	1.301	0.537279	1	1	PP
210638_s_at	FBXO9*	F-box protein 9	0.699	1.301	0.537279	1	1	PP
212118_at	TRIM27*	tripartite motif-containing 27	0.699	1.301	0.537279	1	1	PP
223445_at	DTNBP1 (includes EG:84062)*	dystrobrevin binding protein 1	0.699	1.301	0.537279	1	1	PP
224570_s_at	IRF2BP2*	interferon regulatory factor 2 binding protein 2	0.699	1.301	0.537279	1	1	PP
225260_s_at	MRPL32	mitochondrial ribosomal protein L32	0.699	1.301	0.537279	1	1	PP
225514_at			0.699	1.301	0.537279	1	1	PP
227237_x_at	ATAD3B*	ATPase family, AAA domain containing 3B	0.699	1.301	0.537279	1	1	PP
229579_s_at	DISP2	dispatched homolog 2 (Drosophila)	0.699	1.301	0.537279	0	1	P50
201225_s_at	SRRM1*	serine/arginine repetitive matrix 1	0.7	1.3	0.538462	1	1	PP
202908_at	WFS1*	Wolfram syndrome 1 (wolframin)	0.7	1.3	0.538462	1	1	PP
209971_x_at	JTV1*	JTV1 gene	0.7	1.3	0.538462	1	1	PP
210242_x_at	MTHFS*	5,10-methenyltetrahydrofolate synthetase (5-formyltetrahydrofolate cyclo-ligase)	0.7	1.3	0.538462	1	1	PP
213747_at			0.7	1.3	0.538462	1	1	PP
217979_at	TSPAN13	tetraspanin 13	0.7	1.3	0.538462	1	1	PP
220668_s_at	DNMT3B	DNA (cytosine-5-)-methyltransferase 3 beta	0.7	1.3	0.538462	1	1	PP
223455_at	TCHP	trichoplein, keratin filament binding	0.7	1.3	0.538462	1	1	PP
226206_at	MAFK	v-maf musculoaponeurotic fibrosarcoma oncogene homolog K (avian)	0.7	1.3	0.538462	1	1	PP
229892_at	EP400NL	EP400 N-terminal like	0.7	1.3	0.538462	1	1	PP
240928_at			0.7	1.3	0.538462	1	1	PP
AFFX-DapX-5_at			0.7	1.3	0.538462	1	1	PP
200875_s_at	NOL5A*	nucleolar protein 5A (56kDa with KKE/D repeat)	0.701	1.299	0.539646	1	1	PP
204016_at	LARS2*	leucyl-tRNA synthetase 2, mitochondrial	0.701	1.299	0.539646	1	1	PP
211200_s_at	EFCAB2*	EF-hand calcium binding domain 2	0.701	1.299	0.539646	1	1	PP
211730_s_at	POLR2L*	polymerase (RNA) II (DNA directed) polypeptide L, 7.6kDa	0.701	1.299	0.539646	1	1	PP
213427_at	RPP40	ribonuclease P/MRP 40kDa subunit	0.701	1.299	0.539646	1	1	PP
219021_at	RNF121	ring finger protein 121	0.701	1.299	0.539646	0	1	P50
219098_at	MYBBP1A	MYB binding protein (P160) 1a	0.701	1.299	0.539646	1	1	PP
219832_s_at	HOXC13	homeobox C13	0.701	1.299	0.539646	1	1	PP
221999_at	VRK3*	vaccinia related kinase 3	0.701	1.299	0.539646	1	1	PP
223785_at	FANCI*	Fanconi anemia, complementation group I	0.701	1.299	0.539646	1	1	PP
1567014_s_at	NFE2L2*	nuclear factor (erythroid-derived 2)-like 2	0.702	1.298	0.540832	0	1	P50
201018_at	EIF1AX*	eukaryotic translation initiation factor 1A, X-linked	0.702	1.298	0.540832	1	1	PP
209188_x_at	DR1*	down-regulator of transcription 1, TBP-binding (negative cofactor 2)	0.702	1.298	0.540832	1	1	PP
209803_s_at	PHLDA2*	pleckstrin homology-like domain, family A, member 2	0.702	1.298	0.540832	1	1	PP
210463_x_at	TRMT1*	TRM1 tRNA methyltransferase 1 homolog (S. cerevisiae)	0.702	1.298	0.540832	1	1	PP
211043_s_at	CLTB*	clathrin, light chain (Lcb)	0.702	1.298	0.540832	1	1	PP
215482_s_at	EIF2B4*	eukaryotic translation initiation factor 2B, subunit 4 delta, 67kDa	0.702	1.298	0.540832	1	1	PP
218128_at	NFYB*	nuclear transcription factor Y, beta	0.702	1.298	0.540832	1	1	PP
220643_s_at	FAIM	Fas apoptotic inhibitory molecule	0.702	1.298	0.540832	1	1	PP
222704_at	POLR1A	polymerase (RNA) I polypeptide A, 194kDa	0.702	1.298	0.540832	1	1	PP
231018_at			0.702	1.298	0.540832	1	1	PP
244822_at	GART*	phosphoribosylglycinamide formyltransferase, phosphoribosylglycinamide synthetase, phosphoribosylaminoimidazole synthetase	0.702	1.298	0.540832	1	1	PP
1552362_a_at	LEAP-2	liver expressed antimicrobial peptide 2	0.703	1.297	0.54202	0	1	P50
1558345_a_at			0.703	1.297	0.54202	1	1	PP
200776_s_at	BZW1*	basic leucine zipper and W2 domains 1	0.703	1.297	0.54202	1	1	PP
201489_at	PPIF*	peptidylprolyl isomerase F (cyclophilin F)	0.703	1.297	0.54202	1	1	PP
205093_at	PLEKHA6*	pleckstrin homology domain containing, family A member 6	0.703	1.297	0.54202	0	1	P50
208614_s_at	FLNB*	filamin B, beta (actin binding protein 278)	0.703	1.297	0.54202	1	1	PP
217992_s_at	EFHD2*	EF-hand domain family, member D2	0.703	1.297	0.54202	1	1	PP
219056_at	RNASEH2B*	ribonuclease H2, subunit B	0.703	1.297	0.54202	1	1	PP
219324_at	NOL12	nucleolar protein 12	0.703	1.297	0.54202	1	1	PP
223408_s_at	FOXK2*	forkhead box K2	0.703	1.297	0.54202	0	1	P50
224467_s_at	PDCD2L	programmed cell death 2-like	0.703	1.297	0.54202	1	1	PP
224791_at	DDEF1*	development and differentiation enhancing factor 1	0.703	1.297	0.54202	1	1	PP
235223_at			0.703	1.297	0.54202	1	1	PP
238065_at			0.703	1.297	0.54202	1	1	PP
AFFX-r2-Bs-thr-5_s_at			0.703	1.297	0.54202	1	1	PP
202223_at	STT3A	STT3, subunit of the oligosaccharyltransferase complex, homolog A (S. cerevisiae)	0.704	1.296	0.54321	1	1	PP
209136_s_at	USP10*	ubiquitin specific peptidase 10	0.704	1.296	0.54321	1	1	PP
209203_s_at	BICD2*	bicaudal D homolog 2 (Drosophila)	0.704	1.296	0.54321	1	1	PP
214668_at	C13ORF1*	chromosome 13 open reading frame 1	0.704	1.296	0.54321	1	1	PP
215068_s_at	FBXL18	F-box and leucine-rich repeat protein 18	0.704	1.296	0.54321	1	1	PP
219646_at	FLJ20186*	hypothetical protein FLJ20186	0.704	1.296	0.54321	1	1	PP
228671_at			0.704	1.296	0.54321	0	1	P50
229835_s_at			0.704	1.296	0.54321	1	1	PP
1553162_x_at	C19ORF55*	chromosome 19 open reading frame 55	0.705	1.295	0.544402	0	1	P50
202027_at	TMEM184B	transmembrane protein 184B	0.705	1.295	0.544402	1	1	PP
205805_s_at	ROR1 (includes EG:4919)*	receptor tyrosine kinase-like orphan receptor 1	0.705	1.295	0.544402	1	1	PP
208478_s_at	BAX*	BCL2-associated X protein	0.705	1.295	0.544402	1	1	PP
210206_s_at	DDX11*	DEAD/H (Asp-Glu-Ala-Asp/His) box polypeptide 11 (CHL1-like helicase homolog, S. cerevisiae)	0.705	1.295	0.544402	1	1	PP
214100_x_at	NSUN5B*	NOL1/NOP2/Sun domain family, member 5B	0.705	1.295	0.544402	1	1	PP
219146_at	C17ORF42*	chromosome 17 open reading frame 42	0.705	1.295	0.544402	1	1	PP
219219_at	TMEM160	transmembrane protein 160	0.705	1.295	0.544402	1	1	PP
200641_s_at	YWHAZ*	tyrosine 3-monooxygenase/tryptophan 5-monooxygenase activation protein, zeta polypeptide	0.706	1.294	0.545595	1	1	PP
201278_at	DAB2*	disabled homolog 2, mitogen-responsive phosphoprotein (Drosophila)	0.706	1.294	0.545595	1	1	PP
202622_s_at	ATXN2*	ataxin 2	0.706	1.294	0.545595	1	1	PP
203622_s_at	PNO1*	partner of NOB1 homolog (S. cerevisiae)	0.706	1.294	0.545595	1	1	PP
207667_s_at	MAP2K3*	mitogen-activated protein kinase kinase 3	0.706	1.294	0.545595	1	1	PP
212142_at	MCM4*	minichromosome maintenance complex component 4	0.706	1.294	0.545595	1	1	PP
214965_at	SPATA2L	spermatogenesis associated 2-like	0.706	1.294	0.545595	1	1	PP
218917_s_at	ARID1A*	AT rich interactive domain 1A (SWI-like)	0.706	1.294	0.545595	1	1	PP
222113_s_at	EPS15L1*	epidermal growth factor receptor pathway substrate 15-like 1	0.706	1.294	0.545595	1	1	PP
222280_at	GAPDHS*	glyceraldehyde-3-phosphate dehydrogenase, spermatogenic	0.706	1.294	0.545595	0	1	P50
230350_at			0.706	1.294	0.545595	1	1	PP
1554082_a_at	NOL9*	nucleolar protein 9	0.707	1.293	0.54679	1	1	PP
1569253_at	INTS4*	integrator complex subunit 4	0.707	1.293	0.54679	1	1	PP
202070_s_at	IDH3A*	isocitrate dehydrogenase 3 (NAD+) alpha	0.707	1.293	0.54679	1	1	PP
204983_s_at	GPC4*	glypican 4	0.707	1.293	0.54679	1	1	PP
208637_x_at	ACTN1*	actinin, alpha 1	0.707	1.293	0.54679	1	1	PP
209141_at	UBE2G1*	ubiquitin-conjugating enzyme E2G 1 (UBC7 homolog, yeast)	0.707	1.293	0.54679	1	1	PP
209350_s_at	GPS2	G protein pathway suppressor 2	0.707	1.293	0.54679	1	1	PP
212848_s_at	C9ORF3*	chromosome 9 open reading frame 3	0.707	1.293	0.54679	1	1	PP
215285_s_at	PHTF1	putative homeodomain transcription factor 1	0.707	1.293	0.54679	1	1	PP
218126_at	FAM82C	family with sequence similarity 82, member C	0.707	1.293	0.54679	1	1	PP
228153_at	IBRDC2*	IBR domain containing 2	0.707	1.293	0.54679	1	1	PP
203062_s_at	MDC1*	mediator of DNA damage checkpoint 1	0.708	1.292	0.547988	1	1	PP
205570_at	PIP5K2A*	phosphatidylinositol-4-phosphate 5-kinase, type II, alpha	0.708	1.292	0.547988	1	1	PP
213919_at	DNAJC4*	DnaJ (Hsp40) homolog, subfamily C, member 4	0.708	1.292	0.547988	1	1	PP
218374_s_at	C12ORF4*	chromosome 12 open reading frame 4	0.708	1.292	0.547988	1	1	PP
221871_s_at	TFG*	TRK-fused gene	0.708	1.292	0.547988	1	1	PP
222532_at	SRPRB*	signal recognition particle receptor, B subunit	0.708	1.292	0.547988	1	1	PP
223143_s_at	C6ORF166*	chromosome 6 open reading frame 166	0.708	1.292	0.547988	1	1	PP
226617_at	ARL5A*	ADP-ribosylation factor-like 5A	0.708	1.292	0.547988	1	1	PP
238053_at	DHRSX*	dehydrogenase/reductase (SDR family) X-linked	0.708	1.292	0.547988	1	1	PP
243011_at	FAM55C*	family with sequence similarity 55, member C	0.708	1.292	0.547988	0	1	P50
1564166_s_at	PMS2L3*	postmeiotic segregation increased 2-like 3	0.709	1.291	0.549187	1	1	PP
200916_at	TAGLN2*	transgelin 2	0.709	1.291	0.549187	1	1	PP
203557_s_at	PCBD1	pterin-4 alpha-carbinolamine dehydratase/dimerization cofactor of hepatocyte nuclear factor 1 alpha (TCF1)	0.709	1.291	0.549187	0	1	P50
208636_at	ACTN1*	actinin, alpha 1	0.709	1.291	0.549187	1	1	PP
210987_x_at	TPM1*	tropomyosin 1 (alpha)	0.709	1.291	0.549187	1	1	PP
211672_s_at	ARPC4*	actin related protein 2/3 complex, subunit 4, 20kDa	0.709	1.291	0.549187	1	1	PP
214892_x_at	C19ORF29*	chromosome 19 open reading frame 29	0.709	1.291	0.549187	0	1	P50
221549_at	GRWD1	glutamate-rich WD repeat containing 1	0.709	1.291	0.549187	1	1	PP
226066_at	MITF*	microphthalmia-associated transcription factor	0.709	1.291	0.549187	0	1	P50
226612_at			0.709	1.291	0.549187	1	1	PP
228879_at			0.709	1.291	0.549187	1	1	PP
236217_at	SLC31A1*	solute carrier family 31 (copper transporters), member 1	0.709	1.291	0.549187	1	1	PP
1554321_a_at	NFS1*	NFS1 nitrogen fixation 1 homolog (S. cerevisiae)	0.71	1.29	0.550388	1	1	PP
1556931_at	CDC42*	cell division cycle 42 (GTP binding protein, 25kDa)	0.71	1.29	0.550388	1	1	PP
201872_s_at	ABCE1*	ATP-binding cassette, sub-family E (OABP), member 1	0.71	1.29	0.550388	1	1	PP
204478_s_at	RABIF*	RAB interacting factor	0.71	1.29	0.550388	1	1	PP
207469_s_at	PIR	pirin (iron-binding nuclear protein)	0.71	1.29	0.550388	1	1	PP
208315_x_at	TRAF3*	TNF receptor-associated factor 3	0.71	1.29	0.550388	0	1	P50
213302_at	PFAS	phosphoribosylformylglycinamidine synthase (FGAR amidotransferase)	0.71	1.29	0.550388	1	1	PP
214017_s_at	DHX34	DEAH (Asp-Glu-Ala-His) box polypeptide 34	0.71	1.29	0.550388	0	1	P50
214331_at	TSFM*	Ts translation elongation factor, mitochondrial	0.71	1.29	0.550388	1	1	PP
221276_s_at	SYNC1*	syncoilin, intermediate filament 1	0.71	1.29	0.550388	0	1	P50
221988_at	C19ORF42*	chromosome 19 open reading frame 42	0.71	1.29	0.550388	1	1	PP
227174_at	WDR72	WD repeat domain 72	0.71	1.29	0.550388	1	1	PP
227328_at	CAMTA1*	calmodulin binding transcription activator 1	0.71	1.29	0.550388	1	1	PP
227366_at	RILP	Rab interacting lysosomal protein	0.71	1.29	0.550388	0	1	P50
1569190_at	SCLT1*	sodium channel and clathrin linker 1	0.711	1.289	0.55159	1	1	PP
201966_at	NDUFS2	NADH dehydrogenase (ubiquinone) Fe-S protein 2, 49kDa (NADH-coenzyme Q reductase)	0.711	1.289	0.55159	1	1	PP
202160_at	CREBBP*	CREB binding protein (Rubinstein-Taybi syndrome)	0.711	1.289	0.55159	1	1	PP
202453_s_at	GTF2H1*	general transcription factor IIH, polypeptide 1, 62kDa	0.711	1.289	0.55159	1	1	PP
203579_s_at	SLC7A6*	solute carrier family 7 (cationic amino acid transporter, y+ system), member 6	0.711	1.289	0.55159	1	1	PP
206275_s_at	MICAL2*	microtubule associated monoxygenase, calponin and LIM domain containing 2	0.711	1.289	0.55159	0	1	P50
212574_x_at	C19ORF6*	chromosome 19 open reading frame 6	0.711	1.289	0.55159	0	1	P50
217972_at	CHCHD3	coiled-coil-helix-coiled-coil-helix domain containing 3	0.711	1.289	0.55159	1	1	PP
227882_at	FKRP	fukutin related protein	0.711	1.289	0.55159	0	1	P50
1552612_at	CDC42SE2*	CDC42 small effector 2	0.712	1.288	0.552795	1	1	PP
202941_at	NDUFV2*	NADH dehydrogenase (ubiquinone) flavoprotein 2, 24kDa	0.712	1.288	0.552795	1	1	PP
207435_s_at	SRRM2*	serine/arginine repetitive matrix 2	0.712	1.288	0.552795	1	1	PP
213144_at	GOSR2*	golgi SNAP receptor complex member 2	0.712	1.288	0.552795	0	1	P50
214639_s_at	HOXA1	homeobox A1	0.712	1.288	0.552795	1	1	PP
217790_s_at	SSR3*	signal sequence receptor, gamma (translocon-associated protein gamma)	0.712	1.288	0.552795	0	1	P50
220044_x_at	CROP*	cisplatin resistance-associated overexpressed protein	0.712	1.288	0.552795	1	1	PP
226194_at	C13ORF8	chromosome 13 open reading frame 8	0.712	1.288	0.552795	1	1	PP
227680_at	ZNF326*	zinc finger protein 326	0.712	1.288	0.552795	1	1	PP
228381_at	ATF7IP2*	activating transcription factor 7 interacting protein 2	0.712	1.288	0.552795	1	1	PP
228535_at	RAD1*	RAD1 homolog (S. pombe)	0.712	1.288	0.552795	1	1	PP
229949_at	DKFZP434A0131*	DKFZp434A0131 protein	0.712	1.288	0.552795	1	1	PP
231508_s_at			0.712	1.288	0.552795	1	1	PP
231534_at	CDC2*	cell division cycle 2, G1 to S and G2 to M	0.712	1.288	0.552795	1	1	PP
232510_s_at	DPP3*	dipeptidyl-peptidase 3	0.712	1.288	0.552795	1	1	PP
236250_at	AFG3L1*	AFG3 ATPase family gene 3-like 1 (S. cerevisiae)	0.712	1.288	0.552795	1	1	PP
242887_at			0.712	1.288	0.552795	1	1	PP
201929_s_at	PKP4*	plakophilin 4	0.713	1.287	0.554002	1	1	PP
203762_s_at	DYNC2LI1*	dynein, cytoplasmic 2, light intermediate chain 1	0.713	1.287	0.554002	1	1	PP
213043_s_at	MED24	thyroid hormone receptor associated protein 4	0.713	1.287	0.554002	1	1	PP
222723_at	VWA1*	von Willebrand factor A domain containing 1	0.713	1.287	0.554002	1	1	PP
37950_at	PREP*	prolyl endopeptidase	0.713	1.287	0.554002	1	1	PP
1559530_at			0.714	1.286	0.55521	0	1	P50
202288_at	FRAP1	FK506 binding protein 12-rapamycin associated protein 1	0.714	1.286	0.55521	1	1	PP
202572_s_at	DLGAP4*	discs, large (Drosophila) homolog-associated protein 4	0.714	1.286	0.55521	1	1	PP
208955_at	DUT (includes EG:1854)*	dUTP pyrophosphatase	0.714	1.286	0.55521	1	1	PP
211795_s_at	FYB*	FYN binding protein (FYB-120/130)	0.714	1.286	0.55521	1	1	PP
216074_x_at	WWC1*	WW and C2 domain containing 1	0.714	1.286	0.55521	0	1	P50
225185_at	MRAS*	muscle RAS oncogene homolog	0.714	1.286	0.55521	1	1	PP
225234_at	CBL*	Cas-Br-M (murine) ecotropic retroviral transforming sequence	0.714	1.286	0.55521	1	1	PP
226947_at	GUSBL2*	glucuronidase, beta-like 2	0.714	1.286	0.55521	1	1	PP
228914_at			0.714	1.286	0.55521	1	1	PP
230013_s_at	ARHGAP23*	Rho GTPase activating protein 23	0.714	1.286	0.55521	0	1	P50
45633_at	GINS3*	GINS complex subunit 3 (Psf3 homolog)	0.714	1.286	0.55521	1	1	PP
200683_s_at	UBE2L3*	ubiquitin-conjugating enzyme E2L 3	0.715	1.285	0.55642	1	1	PP
201357_s_at	SF3A1*	splicing factor 3a, subunit 1, 120kDa	0.715	1.285	0.55642	1	1	PP
201912_s_at	GSPT1*	G1 to S phase transition 1	0.715	1.285	0.55642	1	1	PP
207253_s_at	UBN1*	ubinuclein 1	0.715	1.285	0.55642	0	1	P50
209453_at	SLC9A1	solute carrier family 9 (sodium/hydrogen exchanger), member 1 (antiporter, Na+/H+, amiloride sensitive)	0.715	1.285	0.55642	1	1	PP
216985_s_at	STX3*	syntaxin 3	0.715	1.285	0.55642	1	1	PP
224209_s_at	GDA	guanine deaminase	0.715	1.285	0.55642	1	1	PP
225145_at	NCOA5*	nuclear receptor coactivator 5	0.715	1.285	0.55642	1	1	PP
225866_at	BXDC1	brix domain containing 1	0.715	1.285	0.55642	1	1	PP
231841_s_at	KIAA1462*	KIAA1462	0.715	1.285	0.55642	0	1	P50
234665_x_at	HHLA3*	HERV-H LTR-associating 3	0.715	1.285	0.55642	1	1	PP
238010_at	C1ORF174*	chromosome 1 open reading frame 174	0.715	1.285	0.55642	1	1	PP
238612_at			0.715	1.285	0.55642	0	1	P50
1559007_s_at			0.716	1.284	0.557632	1	1	PP
1570249_x_at	GNB1*	guanine nucleotide binding protein (G protein), beta polypeptide 1	0.716	1.284	0.557632	1	1	PP
200051_at	SART1	squamous cell carcinoma antigen recognized by T cells	0.716	1.284	0.557632	1	1	PP
202138_x_at	JTV1*	JTV1 gene	0.716	1.284	0.557632	1	1	PP
202545_at	PRKCD	protein kinase C, delta	0.716	1.284	0.557632	1	1	PP
204735_at	PDE4A	phosphodiesterase 4A, cAMP-specific (phosphodiesterase E2 dunce homolog, Drosophila)	0.716	1.284	0.557632	1	1	PP
210531_at	NR2C1 (includes EG:7181)*	nuclear receptor subfamily 2, group C, member 1	0.716	1.284	0.557632	1	1	PP
213875_x_at	C6ORF62*	chromosome 6 open reading frame 62	0.716	1.284	0.557632	1	1	PP
221675_s_at	CHPT1*	choline phosphotransferase 1	0.716	1.284	0.557632	1	1	PP
229751_s_at	PUS7L	pseudouridylate synthase 7 homolog (S. cerevisiae)-like	0.716	1.284	0.557632	1	1	PP
231568_at	RP6-166C19.11	cancer/testis CT47 family, member 11	0.716	1.284	0.557632	0	1	P50
236242_at			0.716	1.284	0.557632	1	1	PP
36564_at	IBRDC3*	IBR domain containing 3	0.716	1.284	0.557632	1	1	PP
1554433_a_at	ZNF146*	zinc finger protein 146	0.717	1.283	0.558846	1	1	PP
1560695_at	QTRTD1*	queuine tRNA-ribosyltransferase domain containing 1	0.717	1.283	0.558846	1	1	PP
200787_s_at	PEA15*	phosphoprotein enriched in astrocytes 15	0.717	1.283	0.558846	1	1	PP
204005_s_at	PAWR*	PRKC, apoptosis, WT1, regulator	0.717	1.283	0.558846	1	1	PP
206416_at	ZNF205	zinc finger protein 205	0.717	1.283	0.558846	0	1	P50
209154_at	TAX1BP3*	Tax1 (human T-cell leukemia virus type I) binding protein 3	0.717	1.283	0.558846	1	1	PP
212424_at	PDCD11*	programmed cell death 11	0.717	1.283	0.558846	0	1	P50
228722_at	PRMT2*	protein arginine methyltransferase 2	0.717	1.283	0.558846	1	1	PP
34764_at	LARS2*	leucyl-tRNA synthetase 2, mitochondrial	0.717	1.283	0.558846	1	1	PP
1570038_at	ZNF595*	zinc finger protein 595	0.718	1.282	0.560062	1	1	PP
201279_s_at	DAB2*	disabled homolog 2, mitogen-responsive phosphoprotein (Drosophila)	0.718	1.282	0.560062	1	1	PP
202256_at	CD2BP2*	CD2 (cytoplasmic tail) binding protein 2	0.718	1.282	0.560062	1	1	PP
202725_at	POLR2A	polymerase (RNA) II (DNA directed) polypeptide A, 220kDa	0.718	1.282	0.560062	1	1	PP
208711_s_at	CCND1*	cyclin D1	0.718	1.282	0.560062	1	1	PP
209165_at	AATF	apoptosis antagonizing transcription factor	0.718	1.282	0.560062	1	1	PP
217427_s_at	HIRA*	HIR histone cell cycle regulation defective homolog A (S. cerevisiae)	0.718	1.282	0.560062	1	1	PP
218060_s_at	C16ORF57*	chromosome 16 open reading frame 57	0.718	1.282	0.560062	1	1	PP
219952_s_at	MCOLN1	mucolipin 1	0.718	1.282	0.560062	0	1	P50
223020_at	CLPTM1L*	CLPTM1-like	0.718	1.282	0.560062	1	1	PP
225083_at	GTF3C6	chromosome 6 open reading frame 51	0.718	1.282	0.560062	1	1	PP
235572_at	SPC24	SPC24, NDC80 kinetochore complex component, homolog (S. cerevisiae)	0.718	1.282	0.560062	1	1	PP
201853_s_at	CDC25B	cell division cycle 25 homolog B (S. pombe)	0.719	1.281	0.56128	1	1	PP
203032_s_at	FH*	fumarate hydratase	0.719	1.281	0.56128	1	1	PP
211037_s_at	LENG4*	leukocyte receptor cluster (LRC) member 4	0.719	1.281	0.56128	0	1	P50
220578_at	ADAMTSL4*	ADAMTS-like 4	0.719	1.281	0.56128	1	1	PP
223446_s_at	DTNBP1 (includes EG:84062)*	dystrobrevin binding protein 1	0.719	1.281	0.56128	1	1	PP
201760_s_at	WSB2*	WD repeat and SOCS box-containing 2	0.72	1.28	0.5625	1	1	PP
203633_at	CPT1A*	carnitine palmitoyltransferase 1A (liver)	0.72	1.28	0.5625	1	1	PP
213263_s_at	PCBP2*	poly(rC) binding protein 2	0.72	1.28	0.5625	1	1	PP
223403_s_at	POLR1B*	polymerase (RNA) I polypeptide B, 128kDa	0.72	1.28	0.5625	1	1	PP
229830_at			0.72	1.28	0.5625	1	1	PP
229952_at	SPTB	spectrin, beta, erythrocytic (includes spherocytosis, clinical type I)	0.72	1.28	0.5625	1	1	PP
202782_s_at	SKIP (includes EG:51763)*	skeletal muscle and kidney enriched inositol phosphatase	0.721	1.279	0.563722	1	1	PP
205251_at	PER2	period homolog 2 (Drosophila)	0.721	1.279	0.563722	1	1	PP
207627_s_at	TFCP2*	transcription factor CP2	0.721	1.279	0.563722	1	1	PP
210530_s_at	NR2C1 (includes EG:7181)*	nuclear receptor subfamily 2, group C, member 1	0.721	1.279	0.563722	1	1	PP
212886_at	CCDC69*	coiled-coil domain containing 69	0.721	1.279	0.563722	1	1	PP
219235_s_at	PHACTR4*	phosphatase and actin regulator 4	0.721	1.279	0.563722	1	1	PP
225148_at	RPS19BP1	ribosomal protein S19 binding protein 1	0.721	1.279	0.563722	1	1	PP
227170_at			0.721	1.279	0.563722	1	1	PP
228204_at	PSMB4*	proteasome (prosome, macropain) subunit, beta type, 4	0.721	1.279	0.563722	1	1	PP
238627_at	TRAPPC2L*	trafficking protein particle complex 2-like	0.721	1.279	0.563722	1	1	PP
239469_at	FNBP4*	formin binding protein 4	0.721	1.279	0.563722	1	1	PP
204967_at	SHROOM2	shroom family member 2	0.722	1.278	0.564945	1	1	PP
205284_at	KIAA0133	KIAA0133	0.722	1.278	0.564945	1	1	PP
218196_at	OSTM1 (includes EG:28962)*	osteopetrosis associated transmembrane protein 1	0.722	1.278	0.564945	1	1	PP
219103_at	DDEFL1*	development and differentiation enhancing factor-like 1	0.722	1.278	0.564945	1	1	PP
219260_s_at	C17ORF81*	chromosome 17 open reading frame 81	0.722	1.278	0.564945	1	1	PP
219480_at	SNAI1	snail homolog 1 (Drosophila)	0.722	1.278	0.564945	1	1	PP
226307_at	CRTC2	CREB regulated transcription coactivator 2	0.722	1.278	0.564945	0	1	P50
229961_x_at	FLJ44968	FLJ44968 protein	0.722	1.278	0.564945	0	1	P50
241298_x_at			0.722	1.278	0.564945	1	1	PP
201348_at	GPX3*	glutathione peroxidase 3 (plasma)	0.723	1.277	0.566171	1	1	PP
202796_at	SYNPO*	synaptopodin	0.723	1.277	0.566171	1	1	PP
203802_x_at	NSUN5*	NOL1/NOP2/Sun domain family, member 5	0.723	1.277	0.566171	1	1	PP
209595_at	GTF2F2	general transcription factor IIF, polypeptide 2, 30kDa	0.723	1.277	0.566171	1	1	PP
213209_at	TAF6L*	TAF6-like RNA polymerase II, p300/CBP-associated factor (PCAF)-associated factor, 65kDa	0.723	1.277	0.566171	1	1	PP
217832_at	SYNCRIP*	synaptotagmin binding, cytoplasmic RNA interacting protein	0.723	1.277	0.566171	1	1	PP
222274_at	FLJ31568	FLJ31568 protein	0.723	1.277	0.566171	0	1	P50
202208_s_at	ARL4C*	ADP-ribosylation factor-like 4C	0.724	1.276	0.567398	1	1	PP
209261_s_at	NR2F6*	nuclear receptor subfamily 2, group F, member 6	0.724	1.276	0.567398	1	1	PP
209772_s_at	CD24*	CD24 molecule	0.724	1.276	0.567398	1	1	PP
213600_at	SIPA1L3 (includes EG:23094)*	signal-induced proliferation-associated 1 like 3	0.724	1.276	0.567398	0	1	P50
220967_s_at	ZNF696	zinc finger protein 696	0.724	1.276	0.567398	0	1	P50
221697_at	MAP1LC3C	microtubule-associated protein 1 light chain 3 gamma	0.724	1.276	0.567398	1	1	PP
228017_s_at	C20ORF58*	chromosome 20 open reading frame 58	0.724	1.276	0.567398	1	1	PP
228596_at			0.724	1.276	0.567398	1	1	PP
1552641_s_at	ATAD3B*	ATPase family, AAA domain containing 3B	0.725	1.275	0.568627	1	1	PP
200629_at	WARS*	tryptophanyl-tRNA synthetase	0.725	1.275	0.568627	1	1	PP
201726_at	ELAVL1*	ELAV (embryonic lethal, abnormal vision, Drosophila)-like 1 (Hu antigen R)	0.725	1.275	0.568627	1	1	PP
202218_s_at	FADS2	fatty acid desaturase 2	0.725	1.275	0.568627	1	1	PP
205777_at	DUSP9	dual specificity phosphatase 9	0.725	1.275	0.568627	0	1	P50
205968_at	KCNS3	potassium voltage-gated channel, delayed-rectifier, subfamily S, member 3	0.725	1.275	0.568627	1	1	PP
206650_at	IQCC	IQ motif containing C	0.725	1.275	0.568627	0	1	P50
206902_s_at	ENDOGL1*	endonuclease G-like 1	0.725	1.275	0.568627	0	1	P50
209429_x_at	EIF2B4*	eukaryotic translation initiation factor 2B, subunit 4 delta, 67kDa	0.725	1.275	0.568627	1	1	PP
211074_at	FOLR1*	folate receptor 1 (adult)	0.725	1.275	0.568627	1	1	PP
211251_x_at	NFYC*	nuclear transcription factor Y, gamma	0.725	1.275	0.568627	1	1	PP
215066_at	PTPRF*	protein tyrosine phosphatase, receptor type, F	0.725	1.275	0.568627	1	1	PP
216620_s_at	ARHGEF10	Rho guanine nucleotide exchange factor (GEF) 10	0.725	1.275	0.568627	1	1	PP
220094_s_at	CCDC90A*	coiled-coil domain containing 90A	0.725	1.275	0.568627	1	1	PP
221208_s_at	C11ORF61*	chromosome 11 open reading frame 61	0.725	1.275	0.568627	1	1	PP
223290_at	PDXP (includes EG:57026)	pyridoxal (pyridoxine, vitamin B6) phosphatase	0.725	1.275	0.568627	1	1	PP
223314_at	TSPAN14*	tetraspanin 14	0.725	1.275	0.568627	1	1	PP
224513_s_at	UBQLN4*	ubiquilin 4	0.725	1.275	0.568627	1	1	PP
227668_at	C17ORF56*	chromosome 17 open reading frame 56	0.725	1.275	0.568627	1	1	PP
234584_s_at	ATE1*	arginyltransferase 1	0.725	1.275	0.568627	0	1	P50
201448_at	TIA1*	TIA1 cytotoxic granule-associated RNA binding protein	0.726	1.274	0.569859	1	1	PP
203162_s_at	KATNB1*	katanin p80 (WD repeat containing) subunit B 1	0.726	1.274	0.569859	1	1	PP
203428_s_at	ASF1A*	ASF1 anti-silencing function 1 homolog A (S. cerevisiae)	0.726	1.274	0.569859	1	1	PP
214441_at	STX6*	syntaxin 6	0.726	1.274	0.569859	1	1	PP
214849_at	KCTD20*	potassium channel tetramerisation domain containing 20	0.726	1.274	0.569859	1	1	PP
218648_at	CRTC3*	CREB regulated transcription coactivator 3	0.726	1.274	0.569859	1	1	PP
218787_x_at	CWF19L1*	CWF19-like 1, cell cycle control (S. pombe)	0.726	1.274	0.569859	0	1	P50
221222_s_at	C1ORF56*	chromosome 1 open reading frame 56	0.726	1.274	0.569859	1	1	PP
222641_s_at	C17ORF63	chromosome 17 open reading frame 63	0.726	1.274	0.569859	1	1	PP
223299_at	SEC11C*	SEC11 homolog C (S. cerevisiae)	0.726	1.274	0.569859	1	1	PP
223427_s_at	EPB41L4B*	erythrocyte membrane protein band 4.1 like 4B	0.726	1.274	0.569859	1	1	PP
224572_s_at	IRF2BP2*	interferon regulatory factor 2 binding protein 2	0.726	1.274	0.569859	1	1	PP
224885_s_at	KRTCAP2	keratinocyte associated protein 2	0.726	1.274	0.569859	1	1	PP
235309_at			0.726	1.274	0.569859	1	1	PP
242272_at	ZNF785	zinc finger protein 785	0.66	1.158	0.569948	0	1	P50
1560286_s_at			0.727	1.273	0.571092	1	1	PP
200054_at	ZNF259*	zinc finger protein 259	0.727	1.273	0.571092	1	1	PP
202103_at	BRD4*	bromodomain containing 4	0.727	1.273	0.571092	1	1	PP
203239_s_at	CNOT3*	CCR4-NOT transcription complex, subunit 3	0.727	1.273	0.571092	1	1	PP
203422_at	POLD1	polymerase (DNA directed), delta 1, catalytic subunit 125kDa	0.727	1.273	0.571092	1	1	PP
204185_x_at	PPID*	peptidylprolyl isomerase D (cyclophilin D)	0.727	1.273	0.571092	1	1	PP
204998_s_at	ATF5*	activating transcription factor 5	0.727	1.273	0.571092	1	1	PP
205909_at	POLE2	polymerase (DNA directed), epsilon 2 (p59 subunit)	0.727	1.273	0.571092	1	1	PP
212881_at	PIAS4	protein inhibitor of activated STAT, 4	0.727	1.273	0.571092	1	1	PP
220434_at	ADCK4*	aarF domain containing kinase 4	0.727	1.273	0.571092	0	1	P50
228013_at	PPP2R2A*	protein phosphatase 2 (formerly 2A), regulatory subunit B, alpha isoform	0.727	1.273	0.571092	1	1	PP
239633_at	ATP6V0D1*	ATPase, H+ transporting, lysosomal 38kDa, V0 subunit d1	0.727	1.273	0.571092	0	1	P50
1569448_at	PGM2L1*	phosphoglucomutase 2-like 1	0.728	1.272	0.572327	0	1	P50
201121_s_at	PGRMC1*	progesterone receptor membrane component 1	0.728	1.272	0.572327	1	1	PP
211340_s_at	MCAM*	melanoma cell adhesion molecule	0.728	1.272	0.572327	1	1	PP
221758_at	ARMC6 (includes EG:93436)	armadillo repeat containing 6	0.728	1.272	0.572327	1	1	PP
224771_at	NAV1*	neuron navigator 1	0.728	1.272	0.572327	1	1	PP
226935_s_at	CLPTM1L*	CLPTM1-like	0.728	1.272	0.572327	1	1	PP
227165_at	C13ORF3	chromosome 13 open reading frame 3	0.728	1.272	0.572327	1	1	PP
230618_s_at			0.728	1.272	0.572327	1	1	PP
1557910_at	HSP90AB1*	heat shock protein 90kDa alpha (cytosolic), class B member 1	0.729	1.271	0.573564	1	1	PP
1569254_s_at	INTS4*	integrator complex subunit 4	0.729	1.271	0.573564	1	1	PP
201321_s_at	SMARCC2*	SWI/SNF related, matrix associated, actin dependent regulator of chromatin, subfamily c, member 2	0.729	1.271	0.573564	1	1	PP
202181_at	KIAA0247	KIAA0247	0.729	1.271	0.573564	1	1	PP
202516_s_at	DLG1*	discs, large homolog 1 (Drosophila)	0.729	1.271	0.573564	1	1	PP
202924_s_at	PLAGL2*	pleiomorphic adenoma gene-like 2	0.729	1.271	0.573564	1	1	PP
203624_at	SFRS17A	splicing factor, arginine/serine-rich 17A	0.729	1.271	0.573564	1	1	PP
203890_s_at	DAPK3*	death-associated protein kinase 3	0.729	1.271	0.573564	0	1	P50
212322_at	SGPL1*	sphingosine-1-phosphate lyase 1	0.729	1.271	0.573564	1	1	PP
212748_at	MKL1	megakaryoblastic leukemia (translocation) 1	0.729	1.271	0.573564	1	1	PP
213154_s_at	BICD2*	bicaudal D homolog 2 (Drosophila)	0.729	1.271	0.573564	1	1	PP
217445_s_at	GART*	phosphoribosylglycinamide formyltransferase, phosphoribosylglycinamide synthetase, phosphoribosylaminoimidazole synthetase	0.729	1.271	0.573564	1	1	PP
223116_at	BCAR1*	breast cancer anti-estrogen resistance 1	0.729	1.271	0.573564	1	1	PP
227278_at			0.729	1.271	0.573564	1	1	PP
228181_at	SLC30A1*	solute carrier family 30 (zinc transporter), member 1	0.729	1.271	0.573564	1	1	PP
241720_at	ZNF326*	zinc finger protein 326	0.729	1.271	0.573564	0	1	P50
200800_s_at	HSPA1A*	heat shock 70kDa protein 1A	0.73	1.27	0.574803	1	1	PP
201120_s_at	PGRMC1*	progesterone receptor membrane component 1	0.73	1.27	0.574803	1	1	PP
202007_at	NID1*	nidogen 1	0.73	1.27	0.574803	1	1	PP
205449_at	SAC3D1	SAC3 domain containing 1	0.73	1.27	0.574803	1	1	PP
208456_s_at	RRAS2*	related RAS viral (r-ras) oncogene homolog 2	0.73	1.27	0.574803	1	1	PP
213056_at	FRMD4B	FERM domain containing 4B	0.73	1.27	0.574803	1	1	PP
213691_at			0.73	1.27	0.574803	0	1	P50
218255_s_at	FBRS*	fibrosin	0.73	1.27	0.574803	1	1	PP
225217_s_at	BRPF3	bromodomain and PHD finger containing, 3	0.73	1.27	0.574803	1	1	PP
238610_s_at	HNRPM*	heterogeneous nuclear ribonucleoprotein M	0.73	1.27	0.574803	1	1	PP
242627_at	PNO1*	partner of NOB1 homolog (S. cerevisiae)	0.73	1.27	0.574803	1	1	PP
1561998_at			0.731	1.269	0.576044	1	1	PP
201368_at	ZFP36L2	zinc finger protein 36, C3H type-like 2	0.731	1.269	0.576044	1	1	PP
203035_s_at	PIAS3	protein inhibitor of activated STAT, 3	0.731	1.269	0.576044	1	1	PP
203612_at	BYSL	bystin-like	0.731	1.269	0.576044	1	1	PP
204786_s_at	IFNAR2	interferon (alpha, beta and omega) receptor 2	0.731	1.269	0.576044	1	1	PP
212016_s_at	PTBP1*	polypyrimidine tract binding protein 1	0.731	1.269	0.576044	1	1	PP
212225_at	EIF1 (includes EG:10209)*	eukaryotic translation initiation factor 1	0.731	1.269	0.576044	0	1	P50
213460_x_at	NSUN5C*	NOL1/NOP2/Sun domain family, member 5C	0.731	1.269	0.576044	1	1	PP
213720_s_at	SMARCA4*	SWI/SNF related, matrix associated, actin dependent regulator of chromatin, subfamily a, member 4	0.731	1.269	0.576044	1	1	PP
215171_s_at	TIMM17A*	translocase of inner mitochondrial membrane 17 homolog A (yeast)	0.731	1.269	0.576044	1	1	PP
215631_s_at	BRMS1	breast cancer metastasis suppressor 1	0.731	1.269	0.576044	1	1	PP
220399_at	FLJ22639	hypothetical protein FLJ22639	0.731	1.269	0.576044	1	1	PP
221552_at	ABHD6*	abhydrolase domain containing 6	0.731	1.269	0.576044	0	1	P50
222039_at	LOC146909	hypothetical protein LOC146909	0.731	1.269	0.576044	1	1	PP
222251_s_at	GMEB2*	glucocorticoid modulatory element binding protein 2	0.731	1.269	0.576044	1	1	PP
223433_at	C7ORF36	chromosome 7 open reading frame 36	0.731	1.269	0.576044	1	1	PP
225560_at	POMT2	protein-O-mannosyltransferase 2	0.731	1.269	0.576044	1	1	PP
230738_at			0.731	1.269	0.576044	0	1	P50
235651_at			0.454	0.788	0.576142	0	1	P50
1555860_x_at			0.634	1.1	0.576364	1	1	PP
1554084_a_at	NOL9*	nucleolar protein 9	0.732	1.268	0.577287	0	1	P50
201586_s_at	SFPQ*	splicing factor proline/glutamine-rich (polypyrimidine tract binding protein associated)	0.732	1.268	0.577287	1	1	PP
201920_at	SLC20A1	solute carrier family 20 (phosphate transporter), member 1	0.732	1.268	0.577287	1	1	PP
209811_at	CASP2*	caspase 2, apoptosis-related cysteine peptidase (neural precursor cell expressed, developmentally down-regulated 2)	0.732	1.268	0.577287	0	1	P50
213136_at	PTPN2*	protein tyrosine phosphatase, non-receptor type 2	0.732	1.268	0.577287	1	1	PP
218138_at	MKKS*	McKusick-Kaufman syndrome	0.732	1.268	0.577287	1	1	PP
221082_s_at	NDRG3*	NDRG family member 3	0.732	1.268	0.577287	1	1	PP
221227_x_at	COQ3*	coenzyme Q3 homolog, methyltransferase (S. cerevisiae)	0.732	1.268	0.577287	1	0	P50
223057_s_at	XPO5*	exportin 5	0.732	1.268	0.577287	1	1	PP
226053_at	MAP2K7*	mitogen-activated protein kinase kinase 7	0.732	1.268	0.577287	1	1	PP
227784_s_at	COG1	component of oligomeric golgi complex 1	0.732	1.268	0.577287	1	1	PP
228252_at	PIF1 (includes EG:80119)	PIF1 5'-to-3' DNA helicase homolog (S. cerevisiae)	0.732	1.268	0.577287	1	1	PP
229742_at			0.732	1.268	0.577287	1	1	PP
1555360_a_at	DNAJC11*	DnaJ (Hsp40) homolog, subfamily C, member 11	0.733	1.267	0.578532	1	1	PP
1559528_at			0.733	1.267	0.578532	0	1	P50
202240_at	PLK1	polo-like kinase 1 (Drosophila)	0.733	1.267	0.578532	1	1	PP
202825_at	SLC25A4	solute carrier family 25 (mitochondrial carrier; adenine nucleotide translocator), member 4	0.733	1.267	0.578532	1	1	PP
209346_s_at	PI4K2A*	phosphatidylinositol 4-kinase type II	0.733	1.267	0.578532	0	1	P50
212723_at	JMJD6*	jumonji domain containing 6	0.733	1.267	0.578532	1	1	PP
212996_s_at	URB1	URB1 ribosome biogenesis 1 homolog (S. cerevisiae)	0.733	1.267	0.578532	1	1	PP
214009_at	MSL3L1*	male-specific lethal 3-like 1 (Drosophila)	0.733	1.267	0.578532	1	1	PP
215706_x_at	ZYX*	zyxin	0.733	1.267	0.578532	1	1	PP
215891_s_at	GM2A*	GM2 ganglioside activator	0.733	1.267	0.578532	1	1	PP
217124_at	IQCE*	IQ motif containing E	0.733	1.267	0.578532	1	1	PP
217861_s_at	PREB	prolactin regulatory element binding	0.733	1.267	0.578532	1	1	PP
221882_s_at	TMEM8	transmembrane protein 8 (five membrane-spanning domains)	0.733	1.267	0.578532	1	1	PP
224372_at			0.733	1.267	0.578532	1	1	PP
224724_at	SULF2*	sulfatase 2	0.733	1.267	0.578532	1	1	PP
225237_s_at	MSI2*	musashi homolog 2 (Drosophila)	0.733	1.267	0.578532	1	1	PP
225470_at	NUP35	nucleoporin 35kDa	0.733	1.267	0.578532	1	1	PP
228705_at	CAPN12	calpain 12	0.733	1.267	0.578532	1	1	PP
234405_s_at	RNUXA*	RNA U, small nuclear RNA export adaptor (phosphorylation regulated)	0.733	1.267	0.578532	1	1	PP
1557094_at			0.734	1.266	0.579779	1	1	PP
1568954_s_at	C16ORF72*	chromosome 16 open reading frame 72	0.734	1.266	0.579779	1	1	PP
201821_s_at	TIMM17A*	translocase of inner mitochondrial membrane 17 homolog A (yeast)	0.734	1.266	0.579779	1	1	PP
203960_s_at	C1ORF41*	chromosome 1 open reading frame 41	0.734	1.266	0.579779	1	1	PP
204025_s_at	PDCD2*	programmed cell death 2	0.734	1.266	0.579779	1	1	PP
208149_x_at	DDX11*	DEAD/H (Asp-Glu-Ala-Asp/His) box polypeptide 11 (CHL1-like helicase homolog, S. cerevisiae)	0.734	1.266	0.579779	1	1	PP
212422_at	PDCD11*	programmed cell death 11	0.734	1.266	0.579779	1	1	PP
213178_s_at	MAPK8IP3	mitogen-activated protein kinase 8 interacting protein 3	0.734	1.266	0.579779	1	1	PP
221190_s_at	C18ORF8	chromosome 18 open reading frame 8	0.734	1.266	0.579779	1	1	PP
222141_at	KLHL22*	kelch-like 22 (Drosophila)	0.734	1.266	0.579779	0	1	P50
235508_at	PML	promyelocytic leukemia	0.734	1.266	0.579779	1	1	PP
58308_at	TRIM62*	tripartite motif-containing 62	0.734	1.266	0.579779	0	1	P50
200894_s_at	FKBP4*	FK506 binding protein 4, 59kDa	0.735	1.265	0.581028	1	1	PP
201806_s_at	ATXN2L	ataxin 2-like	0.735	1.265	0.581028	0	1	P50
202496_at	EDC4	enhancer of mRNA decapping 4	0.735	1.265	0.581028	1	1	PP
204275_at	SOLH	small optic lobes homolog (Drosophila)	0.735	1.265	0.581028	1	1	PP
208581_x_at	MT1X*	metallothionein 1X	0.735	1.265	0.581028	1	1	PP
211136_s_at	CLPTM1*	cleft lip and palate associated transmembrane protein 1	0.735	1.265	0.581028	1	1	PP
212057_at	KIAA0182*	KIAA0182	0.735	1.265	0.581028	1	1	PP
214201_x_at	BAT2*	HLA-B associated transcript 2	0.735	1.265	0.581028	1	1	PP
218434_s_at	AACS	acetoacetyl-CoA synthetase	0.735	1.265	0.581028	1	1	PP
218755_at	KIF20A	kinesin family member 20A	0.735	1.265	0.581028	1	1	PP
219974_x_at	ECHDC1*	enoyl Coenzyme A hydratase domain containing 1	0.735	1.265	0.581028	1	1	PP
233750_s_at	C1ORF25*	chromosome 1 open reading frame 25	0.735	1.265	0.581028	0	1	P50
241716_at	HSPD1*	heat shock 60kDa protein 1 (chaperonin)	0.735	1.265	0.581028	1	1	PP
1558914_at	C1ORF121*	chromosome 1 open reading frame 121	0.736	1.264	0.582278	1	1	PP
204248_at	GNA11*	guanine nucleotide binding protein (G protein), alpha 11 (Gq class)	0.736	1.264	0.582278	1	1	PP
210649_s_at	ARID1A*	AT rich interactive domain 1A (SWI-like)	0.736	1.264	0.582278	1	1	PP
217693_x_at	LOC388335*	similar to RIKEN cDNA A730055C05 gene	0.736	1.264	0.582278	0	1	P50
218193_s_at	GOLT1B*	golgi transport 1 homolog B (S. cerevisiae)	0.736	1.264	0.582278	1	1	PP
218612_s_at	TSSC4	tumor suppressing subtransferable candidate 4	0.736	1.264	0.582278	1	1	PP
218933_at	SPATA5L1*	spermatogenesis associated 5-like 1	0.736	1.264	0.582278	1	1	PP
224302_s_at	MRPS36*	mitochondrial ribosomal protein S36	0.736	1.264	0.582278	1	1	PP
225422_at	CDC26	cell division cycle 26 homolog (S. cerevisiae)	0.736	1.264	0.582278	1	1	PP
225451_at	GRIPAP1*	GRIP1 associated protein 1	0.736	1.264	0.582278	1	1	PP
226108_at	LOC124245	conserved nuclear protein NHN1	0.736	1.264	0.582278	1	1	PP
226834_at			0.736	1.264	0.582278	1	1	PP
228340_at	TLE3*	transducin-like enhancer of split 3 (E(sp1) homolog, Drosophila)	0.736	1.264	0.582278	1	1	PP
242349_at	HECTD1*	HECT domain containing 1	0.736	1.264	0.582278	1	1	PP
243521_at			0.736	1.264	0.582278	1	1	PP
59705_at	SCLY	selenocysteine lyase	0.736	1.264	0.582278	1	1	PP
237842_at	MAP7D3*	MAP7 domain containing 3	0.631	1.082	0.583179	0	1	P50
205048_s_at	PSPH*	phosphoserine phosphatase	0.737	1.263	0.583531	1	1	PP
205135_s_at	NUFIP1*	nuclear fragile X mental retardation protein interacting protein 1	0.737	1.263	0.583531	1	1	PP
205621_at	ALKBH1*	alkB, alkylation repair homolog 1 (E. coli)	0.737	1.263	0.583531	1	1	PP
205761_s_at	DUS4L*	dihydrouridine synthase 4-like (S. cerevisiae)	0.737	1.263	0.583531	1	1	PP
206675_s_at	SKIL*	SKI-like oncogene	0.737	1.263	0.583531	0	1	P50
212907_at	SLC30A1*	solute carrier family 30 (zinc transporter), member 1	0.737	1.263	0.583531	1	1	PP
218151_x_at	GPR172A*	G protein-coupled receptor 172A	0.737	1.263	0.583531	1	1	PP
218798_at	KRI1*	hypothetical protein FLJ12949	0.737	1.263	0.583531	1	1	PP
221489_s_at	SPRY4	sprouty homolog 4 (Drosophila)	0.737	1.263	0.583531	0	1	P50
222305_at	HK2*	hexokinase 2	0.737	1.263	0.583531	1	1	PP
223689_at	IGF2BP1*	insulin-like growth factor 2 mRNA binding protein 1	0.737	1.263	0.583531	1	1	PP
224233_s_at	MSTO1*	misato homolog 1 (Drosophila)	0.737	1.263	0.583531	1	1	PP
224790_at	DDEF1*	development and differentiation enhancing factor 1	0.737	1.263	0.583531	1	1	PP
225033_at	LOC286167*	hypothetical protein LOC286167	0.737	1.263	0.583531	1	1	PP
225464_at	FRMD6*	FERM domain containing 6	0.737	1.263	0.583531	1	1	PP
226955_at	AFAP1L1*	actin filament associated protein 1-like 1	0.737	1.263	0.583531	1	1	PP
227467_at	RDH10*	retinol dehydrogenase 10 (all-trans)	0.737	1.263	0.583531	1	1	PP
228975_at	SP6	Sp6 transcription factor	0.737	1.263	0.583531	1	1	PP
231505_s_at	SFXN4*	sideroflexin 4	0.737	1.263	0.583531	1	1	PP
236114_at	RUNX1*	runt-related transcription factor 1 (acute myeloid leukemia 1; aml1 oncogene)	0.737	1.263	0.583531	0	1	P50
237299_at			0.737	1.263	0.583531	0	1	P50
217310_s_at	FOXJ3*	forkhead box J3	0.535	0.915	0.584699	1	1	PP
201998_at	ST6GAL1	ST6 beta-galactosamide alpha-2,6-sialyltranferase 1	0.738	1.262	0.584786	1	1	PP
202116_at	DPF2	D4, zinc and double PHD fingers family 2	0.738	1.262	0.584786	1	1	PP
202923_s_at	GCLC*	glutamate-cysteine ligase, catalytic subunit	0.738	1.262	0.584786	1	1	PP
203725_at	GADD45A	growth arrest and DNA-damage-inducible, alpha	0.738	1.262	0.584786	1	1	PP
209185_s_at	IRS2*	insulin receptor substrate 2	0.738	1.262	0.584786	1	1	PP
209196_at	WDR46	WD repeat domain 46	0.738	1.262	0.584786	1	1	PP
212809_at	NFATC2IP*	nuclear factor of activated T-cells, cytoplasmic, calcineurin-dependent 2 interacting protein	0.738	1.262	0.584786	1	1	PP
213126_at	MED8*	mediator of RNA polymerase II transcription, subunit 8 homolog (S. cerevisiae)	0.738	1.262	0.584786	1	1	PP
213264_at	PCBP2*	poly(rC) binding protein 2	0.738	1.262	0.584786	1	1	PP
213836_s_at	WIPI1*	WD repeat domain, phosphoinositide interacting 1	0.738	1.262	0.584786	1	1	PP
213885_at	TRIM3	tripartite motif-containing 3	0.738	1.262	0.584786	0	1	P50
217670_at	TSPAN4*	tetraspanin 4	0.738	1.262	0.584786	1	1	PP
218460_at	HEATR2*	HEAT repeat containing 2	0.738	1.262	0.584786	1	1	PP
223743_s_at	MRPL4*	mitochondrial ribosomal protein L4	0.738	1.262	0.584786	1	1	PP
224673_at	LENG8	leukocyte receptor cluster (LRC) member 8	0.738	1.262	0.584786	1	1	PP
224765_at	LOC339287*	male-specific lethal-1 homolog	0.738	1.262	0.584786	1	1	PP
225402_at	TP53RK*	TP53 regulating kinase	0.738	1.262	0.584786	1	1	PP
227291_s_at	BOLA3	bolA homolog 3 (E. coli)	0.738	1.262	0.584786	1	1	PP
228496_s_at	CRIM1*	cysteine rich transmembrane BMP regulator 1 (chordin-like)	0.738	1.262	0.584786	1	1	PP
228523_at	NANOS1	nanos homolog 1 (Drosophila)	0.738	1.262	0.584786	1	1	PP
230703_at	C14ORF32*	chromosome 14 open reading frame 32	0.738	1.262	0.584786	1	1	PP
243487_at	AFF4*	AF4/FMR2 family, member 4	0.623	1.064	0.585526	0	1	P50
1554089_s_at	SBDS*	Shwachman-Bodian-Diamond syndrome	0.739	1.261	0.586043	1	1	PP
1560720_at	MKNK1*	MAP kinase interacting serine/threonine kinase 1	0.739	1.261	0.586043	1	1	PP
202773_s_at	SFRS8*	splicing factor, arginine/serine-rich 8 (suppressor-of-white-apricot homolog, Drosophila)	0.739	1.261	0.586043	1	1	PP
207654_x_at	DR1*	down-regulator of transcription 1, TBP-binding (negative cofactor 2)	0.739	1.261	0.586043	1	1	PP
210524_x_at	MT1F*	metallothionein 1F	0.739	1.261	0.586043	1	1	PP
218653_at	SLC25A15*	solute carrier family 25 (mitochondrial carrier; ornithine transporter) member 15	0.739	1.261	0.586043	1	1	PP
222126_at	HRBL	HIV-1 Rev binding protein-like	0.739	1.261	0.586043	1	1	PP
225309_at	PHF5A	PHD finger protein 5A	0.739	1.261	0.586043	1	1	PP
225850_at	SFT2D1*	SFT2 domain containing 1	0.739	1.261	0.586043	1	1	PP
226054_at	BRD4*	bromodomain containing 4	0.739	1.261	0.586043	1	1	PP
229644_at	PREP*	prolyl endopeptidase	0.739	1.261	0.586043	1	1	PP
238623_at			0.739	1.261	0.586043	1	1	PP
239121_at	PTK2*	PTK2 protein tyrosine kinase 2	0.739	1.261	0.586043	0	1	P50
239546_at	PQLC2*	PQ loop repeat containing 2	0.739	1.261	0.586043	0	1	P50
235133_at			0.546	0.93	0.587097	0	1	P50
1566303_s_at	PPP1R11*	protein phosphatase 1, regulatory (inhibitor) subunit 11	0.74	1.26	0.587302	1	1	PP
201695_s_at	NP	nucleoside phosphorylase	0.74	1.26	0.587302	1	1	PP
202180_s_at	MVP*	major vault protein	0.74	1.26	0.587302	1	1	PP
203150_at	RABEPK*	Rab9 effector protein with kelch motifs	0.74	1.26	0.587302	1	1	PP
203598_s_at	WBP4*	WW domain binding protein 4 (formin binding protein 21)	0.74	1.26	0.587302	1	1	PP
204168_at	MGST2	microsomal glutathione S-transferase 2	0.74	1.26	0.587302	0	1	P50
207180_s_at	HTATIP2*	HIV-1 Tat interactive protein 2, 30kDa	0.74	1.26	0.587302	1	1	PP
207724_s_at	SPAST*	spastin	0.74	1.26	0.587302	1	1	PP
210092_at	MAGOH*	mago-nashi homolog, proliferation-associated (Drosophila)	0.74	1.26	0.587302	1	1	PP
212964_at	HIC2*	hypermethylated in cancer 2	0.74	1.26	0.587302	1	1	PP
213461_at	NUDT21*	nudix (nucleoside diphosphate linked moiety X)-type motif 21	0.74	1.26	0.587302	1	1	PP
215744_at	FUS*	fusion (involved in t(12;16) in malignant liposarcoma)	0.74	1.26	0.587302	1	1	PP
218188_s_at	TIMM13	translocase of inner mitochondrial membrane 13 homolog (yeast)	0.74	1.26	0.587302	1	1	PP
220789_s_at	TBRG4	transforming growth factor beta regulator 4	0.74	1.26	0.587302	1	1	PP
222043_at	CLU*	clusterin	0.74	1.26	0.587302	0	1	P50
222163_s_at	SPATA5L1*	spermatogenesis associated 5-like 1	0.74	1.26	0.587302	1	1	PP
222555_s_at	MRPL44*	mitochondrial ribosomal protein L44	0.74	1.26	0.587302	1	1	PP
226649_at	PANK1*	pantothenate kinase 1	0.74	1.26	0.587302	1	1	PP
227032_at	PLXNA2*	plexin A2	0.74	1.26	0.587302	1	1	PP
232915_at	DDX49*	DEAD (Asp-Glu-Ala-Asp) box polypeptide 49	0.74	1.26	0.587302	1	0	P50
239670_at			0.74	1.26	0.587302	0	1	P50
241008_at			0.74	1.26	0.587302	0	1	P50
61297_at	CASKIN2	CASK interacting protein 2	0.74	1.26	0.587302	1	1	PP
1554637_a_at	CBFA2T2*	core-binding factor, runt domain, alpha subunit 2; translocated to, 2	0.426	0.725	0.587586	0	1	P50
1553117_a_at	STK38*	serine/threonine kinase 38	0.741	1.259	0.588562	0	1	P50
202678_at	GTF2A2*	general transcription factor IIA, 2, 12kDa	0.741	1.259	0.588562	1	1	PP
208906_at	BSCL2	Bernardinelli-Seip congenital lipodystrophy 2 (seipin)	0.741	1.259	0.588562	1	1	PP
210986_s_at	TPM1*	tropomyosin 1 (alpha)	0.741	1.259	0.588562	1	1	PP
213582_at	ATP11A*	ATPase, Class VI, type 11A	0.741	1.259	0.588562	1	1	PP
219581_at	TSEN2	tRNA splicing endonuclease 2 homolog (S. cerevisiae)	0.741	1.259	0.588562	1	1	PP
220762_s_at	GNB1L*	guanine nucleotide binding protein (G protein), beta polypeptide 1-like	0.741	1.259	0.588562	0	1	P50
222000_at	C1ORF174*	chromosome 1 open reading frame 174	0.741	1.259	0.588562	1	1	PP
222470_s_at	UQCC*	chromosome 20 open reading frame 44	0.741	1.259	0.588562	1	1	PP
222765_x_at	ESF1*	ESF1, nucleolar pre-rRNA processing protein, homolog (S. cerevisiae)	0.741	1.259	0.588562	1	1	PP
227054_at	N6AMT2	N-6 adenine-specific DNA methyltransferase 2 (putative)	0.741	1.259	0.588562	1	1	PP
230863_at			0.741	1.259	0.588562	1	1	PP
236718_at			0.741	1.259	0.588562	0	1	P50
202556_s_at	MCRS1	microspherule protein 1	0.742	1.258	0.589825	1	1	PP
203827_at	WIPI1*	WD repeat domain, phosphoinositide interacting 1	0.742	1.258	0.589825	1	1	PP
205512_s_at	AIFM1	apoptosis-inducing factor, mitochondrion-associated, 1	0.742	1.258	0.589825	1	1	PP
208972_s_at	ATP5G1	ATP synthase, H+ transporting, mitochondrial F0 complex, subunit C1 (subunit 9)	0.742	1.258	0.589825	1	1	PP
209015_s_at	DNAJB6*	DnaJ (Hsp40) homolog, subfamily B, member 6	0.742	1.258	0.589825	1	1	PP
209075_s_at	ISCU	iron-sulfur cluster scaffold homolog (E. coli)	0.742	1.258	0.589825	1	1	PP
214721_x_at	CDC42EP4*	CDC42 effector protein (Rho GTPase binding) 4	0.742	1.258	0.589825	1	1	PP
218024_at	BRP44L	brain protein 44-like	0.742	1.258	0.589825	1	1	PP
218235_s_at	UTP11L	UTP11-like, U3 small nucleolar ribonucleoprotein, (yeast)	0.742	1.258	0.589825	1	1	PP
219068_x_at	ATAD3A*	ATPase family, AAA domain containing 3A	0.742	1.258	0.589825	1	1	PP
225177_at	RAB11FIP1*	RAB11 family interacting protein 1 (class I)	0.742	1.258	0.589825	1	1	PP
229250_at	TPCN2*	two pore segment channel 2	0.742	1.258	0.589825	1	1	PP
230337_at	SOS1*	son of sevenless homolog 1 (Drosophila)	0.742	1.258	0.589825	0	1	P50
78495_at	ZNF783*	zinc finger protein 783	0.742	1.258	0.589825	0	1	P50
1564373_a_at	LOC283887	hypothetical protein LOC283887	0.743	1.257	0.59109	1	1	PP
201259_s_at	SYPL1*	synaptophysin-like 1	0.743	1.257	0.59109	1	1	PP
203463_s_at	EPN2*	epsin 2	0.743	1.257	0.59109	0	1	P50
204113_at	CUGBP1*	CUG triplet repeat, RNA binding protein 1	0.743	1.257	0.59109	1	1	PP
204984_at	GPC4*	glypican 4	0.743	1.257	0.59109	1	1	PP
208624_s_at	EIF4G1*	eukaryotic translation initiation factor 4 gamma, 1	0.743	1.257	0.59109	1	1	PP
209267_s_at	SLC39A8*	solute carrier family 39 (zinc transporter), member 8	0.743	1.257	0.59109	1	1	PP
211572_s_at	SLC23A2*	solute carrier family 23 (nucleobase transporters), member 2	0.743	1.257	0.59109	1	1	PP
215037_s_at	BCL2L1*	BCL2-like 1	0.743	1.257	0.59109	1	1	PP
219110_at	NOLA1	nucleolar protein family A, member 1 (H/ACA small nucleolar RNPs)	0.743	1.257	0.59109	1	1	PP
222597_at	SNAP29*	synaptosomal-associated protein, 29kDa	0.743	1.257	0.59109	1	1	PP
226781_at	C7ORF55*	chromosome 7 open reading frame 55	0.743	1.257	0.59109	1	1	PP
228925_at	TMEM116*	transmembrane protein 116	0.743	1.257	0.59109	0	1	P50
229318_at			0.743	1.257	0.59109	1	1	PP
231999_at	ANKRD11*	ankyrin repeat domain 11	0.743	1.257	0.59109	0	1	P50
234294_x_at	GATAD2A*	GATA zinc finger domain containing 2A	0.743	1.257	0.59109	1	1	PP
236529_at	SRCRB4D	scavenger receptor cysteine rich domain containing, group B (4 domains)	0.743	1.257	0.59109	0	1	P50
201545_s_at	PABPN1*	poly(A) binding protein, nuclear 1	0.744	1.256	0.592357	1	1	PP
202042_at	HARS	histidyl-tRNA synthetase	0.744	1.256	0.592357	1	1	PP
202084_s_at	SEC14L1*	SEC14-like 1 (S. cerevisiae)	0.744	1.256	0.592357	0	1	P50
203379_at	RPS6KA1	ribosomal protein S6 kinase, 90kDa, polypeptide 1	0.744	1.256	0.592357	1	1	PP
204371_s_at	KHSRP*	KH-type splicing regulatory protein (FUSE binding protein 2)	0.744	1.256	0.592357	1	1	PP
205078_at	PIGF*	phosphatidylinositol glycan anchor biosynthesis, class F	0.744	1.256	0.592357	1	1	PP
206335_at	GALNS	galactosamine (N-acetyl)-6-sulfate sulfatase (Morquio syndrome, mucopolysaccharidosis type IVA)	0.744	1.256	0.592357	1	1	PP
208819_at	RAB8A	RAB8A, member RAS oncogene family	0.744	1.256	0.592357	1	1	PP
209301_at	CA2	carbonic anhydrase II	0.744	1.256	0.592357	1	1	PP
209338_at	TFCP2*	transcription factor CP2	0.744	1.256	0.592357	1	1	PP
210757_x_at	DAB2*	disabled homolog 2, mitogen-responsive phosphoprotein (Drosophila)	0.744	1.256	0.592357	1	1	PP
212949_at	NCAPH	non-SMC condensin I complex, subunit H	0.744	1.256	0.592357	1	1	PP
214695_at	UBAP2L*	ubiquitin associated protein 2-like	0.744	1.256	0.592357	1	1	PP
221056_x_at	EPS15L1*	epidermal growth factor receptor pathway substrate 15-like 1	0.744	1.256	0.592357	1	1	PP
221692_s_at	MRPL34	mitochondrial ribosomal protein L34	0.744	1.256	0.592357	1	1	PP
222454_s_at	PARVA*	parvin, alpha	0.744	1.256	0.592357	1	1	PP
229865_at	FNDC3B*	fibronectin type III domain containing 3B	0.744	1.256	0.592357	1	1	PP
233496_s_at	CFL2*	cofilin 2 (muscle)	0.744	1.256	0.592357	1	1	PP
242354_at			0.744	1.256	0.592357	1	1	PP
208460_at	GJA7*	gap junction protein, alpha 7, 45kDa	0.373	0.629	0.593005	0	1	P50
1554279_a_at	CXORF34*	chromosome X open reading frame 34	0.745	1.255	0.593625	0	1	P50
201195_s_at	SLC7A5	solute carrier family 7 (cationic amino acid transporter, y+ system), member 5	0.745	1.255	0.593625	1	1	PP
202216_x_at	NFYC*	nuclear transcription factor Y, gamma	0.745	1.255	0.593625	1	1	PP
202779_s_at	UBE2S	ubiquitin-conjugating enzyme E2S	0.745	1.255	0.593625	1	1	PP
202806_at	DBN1*	drebrin 1	0.745	1.255	0.593625	1	1	PP
203160_s_at	RNF8	ring finger protein 8	0.745	1.255	0.593625	1	1	PP
209776_s_at	SLC19A1*	solute carrier family 19 (folate transporter), member 1	0.745	1.255	0.593625	1	1	PP
210337_s_at	ACLY*	ATP citrate lyase	0.745	1.255	0.593625	1	1	PP
214252_s_at	CLN5*	ceroid-lipofuscinosis, neuronal 5	0.745	1.255	0.593625	1	1	PP
219846_at	GON4L*	gon-4-like (C. elegans)	0.745	1.255	0.593625	1	1	PP
235607_at			0.745	1.255	0.593625	1	1	PP
202221_s_at	EP300*	E1A binding protein p300	0.746	1.254	0.594896	1	1	PP
202248_at	E2F4	E2F transcription factor 4, p107/p130-binding	0.746	1.254	0.594896	0	1	P50
210415_s_at	ODF2*	outer dense fiber of sperm tails 2	0.746	1.254	0.594896	0	1	P50
243165_at	BTF3*	basic transcription factor 3	0.72	1.21	0.595041	0	1	P50
221435_x_at	HYI*	hydroxypyruvate isomerase homolog (E. coli)	0.635	1.066	0.595685	0	1	P50
1555351_s_at	PPHLN1*	periphilin 1	0.747	1.253	0.596169	1	1	PP
1556787_s_at	PDE5A*	phosphodiesterase 5A, cGMP-specific	0.747	1.253	0.596169	0	1	P50
202086_at	MX1	myxovirus (influenza virus) resistance 1, interferon-inducible protein p78 (mouse)	0.747	1.253	0.596169	1	1	PP
202301_s_at	RSRC2*	arginine/serine-rich coiled-coil 2	0.747	1.253	0.596169	1	1	PP
202416_at	DNAJC7*	DnaJ (Hsp40) homolog, subfamily C, member 7	0.747	1.253	0.596169	1	1	PP
202776_at	DNTTIP2	deoxynucleotidyltransferase, terminal, interacting protein 2	0.747	1.253	0.596169	1	1	PP
203848_at	AKAP8*	A kinase (PRKA) anchor protein 8	0.747	1.253	0.596169	1	1	PP
207428_x_at	CDC2L1 (includes EG:984)*	cell division cycle 2-like 1 (PITSLRE proteins)	0.747	1.253	0.596169	0	1	P50
212983_at	HRAS	v-Ha-ras Harvey rat sarcoma viral oncogene homolog	0.747	1.253	0.596169	1	1	PP
217419_x_at	AGRN*	agrin	0.747	1.253	0.596169	1	1	PP
218741_at	CENPM	centromere protein M	0.747	1.253	0.596169	1	1	PP
220020_at	XPNPEP3*	X-prolyl aminopeptidase (aminopeptidase P) 3, putative	0.747	1.253	0.596169	0	1	P50
223203_at			0.747	1.253	0.596169	1	1	PP
235376_at	USP4*	ubiquitin specific peptidase 4 (proto-oncogene)	0.747	1.253	0.596169	1	1	PP
238507_at			0.747	1.253	0.596169	1	1	PP
239232_at	MSI2*	musashi homolog 2 (Drosophila)	0.747	1.253	0.596169	1	1	PP
64408_s_at	CALML4*	calmodulin-like 4	0.747	1.253	0.596169	1	1	PP
202906_s_at	NBN*	nibrin	0.748	1.252	0.597444	1	1	PP
203580_s_at	SLC7A6*	solute carrier family 7 (cationic amino acid transporter, y+ system), member 6	0.748	1.252	0.597444	1	1	PP
203638_s_at	FGFR2*	fibroblast growth factor receptor 2 (bacteria-expressed kinase, keratinocyte growth factor receptor, craniofacial dysostosis 1, Crouzon syndrome, Pfeiffer syndrome, Jackson-Weiss syndrome)	0.748	1.252	0.597444	1	1	PP
204224_s_at	GCH1	GTP cyclohydrolase 1 (dopa-responsive dystonia)	0.748	1.252	0.597444	1	1	PP
204459_at	CSTF2*	cleavage stimulation factor, 3' pre-RNA, subunit 2, 64kDa	0.748	1.252	0.597444	1	1	PP
207286_at	CEP135*	centrosomal protein 135kDa	0.748	1.252	0.597444	0	1	P50
216863_s_at	MORC2*	MORC family CW-type zinc finger 2	0.748	1.252	0.597444	1	1	PP
216976_s_at	RYK*	RYK receptor-like tyrosine kinase	0.748	1.252	0.597444	0	1	P50
217937_s_at	HDAC7A	histone deacetylase 7A	0.748	1.252	0.597444	0	1	P50
219979_s_at	C11ORF73*	chromosome 11 open reading frame 73	0.748	1.252	0.597444	1	1	PP
222526_at	GATAD2A*	GATA zinc finger domain containing 2A	0.748	1.252	0.597444	1	1	PP
228521_s_at	RAB4B	RAB4B, member RAS oncogene family	0.748	1.252	0.597444	1	1	PP
231092_s_at	ZNRF1*	zinc and ring finger 1	0.748	1.252	0.597444	0	1	P50
239069_s_at			0.748	1.252	0.597444	1	1	PP
243470_at	ITFG1*	integrin alpha FG-GAP repeat containing 1	0.748	1.252	0.597444	0	1	P50
1568999_at	PSG4	pregnancy specific beta-1-glycoprotein 4	0.749	1.251	0.598721	0	1	P50
202870_s_at	CDC20	cell division cycle 20 homolog (S. cerevisiae)	0.749	1.251	0.598721	1	1	PP
205403_at	IL1R2	interleukin 1 receptor, type II	0.749	1.251	0.598721	1	1	PP
205895_s_at	NOLC1*	nucleolar and coiled-body phosphoprotein 1	0.749	1.251	0.598721	1	1	PP
208002_s_at	ACOT7*	acyl-CoA thioesterase 7	0.749	1.251	0.598721	1	1	PP
213457_at	MFHAS1	malignant fibrous histiocytoma amplified sequence 1	0.749	1.251	0.598721	1	1	PP
217919_s_at	MRPL42 (includes EG:28977)*	mitochondrial ribosomal protein L42	0.749	1.251	0.598721	1	1	PP
218907_s_at	LRRC61	leucine rich repeat containing 61	0.749	1.251	0.598721	1	1	PP
220685_at	FAM120C	family with sequence similarity 120C	0.749	1.251	0.598721	1	1	PP
222528_s_at	SLC25A37*	solute carrier family 25, member 37	0.749	1.251	0.598721	1	1	PP
224865_at	MLSTD2*	male sterility domain containing 2	0.749	1.251	0.598721	0	1	P50
228378_at	C12ORF29*	chromosome 12 open reading frame 29	0.749	1.251	0.598721	1	1	PP
233021_at			0.749	1.251	0.598721	1	1	PP
235534_at			0.749	1.251	0.598721	1	1	PP
239177_at			0.749	1.251	0.598721	0	1	P50
242116_x_at	ANKRD17*	ankyrin repeat domain 17	0.749	1.251	0.598721	1	1	PP
242486_at	KIAA0101*	KIAA0101	0.749	1.251	0.598721	1	1	PP
242568_s_at			0.749	1.251	0.598721	1	1	PP
1556684_at	RPPH1 (includes EG:85495)	ribonuclease P RNA component H1	0.75	1.25	0.6	0	1	P50
[truncated: 20,981 more rows]
